# Supplementary material for: Computer-Assisted Dental Implant Placement Following Free Flap Reconstruction: Virtual Planning, CAD/CAM Templates, Dynamic Navigation and Augmented Reality
Source: PubMed Central journal article supplement (PMC8833256; doi:10.3389/fonc.2021.754943), 2022-01-28

ION0001 - INF

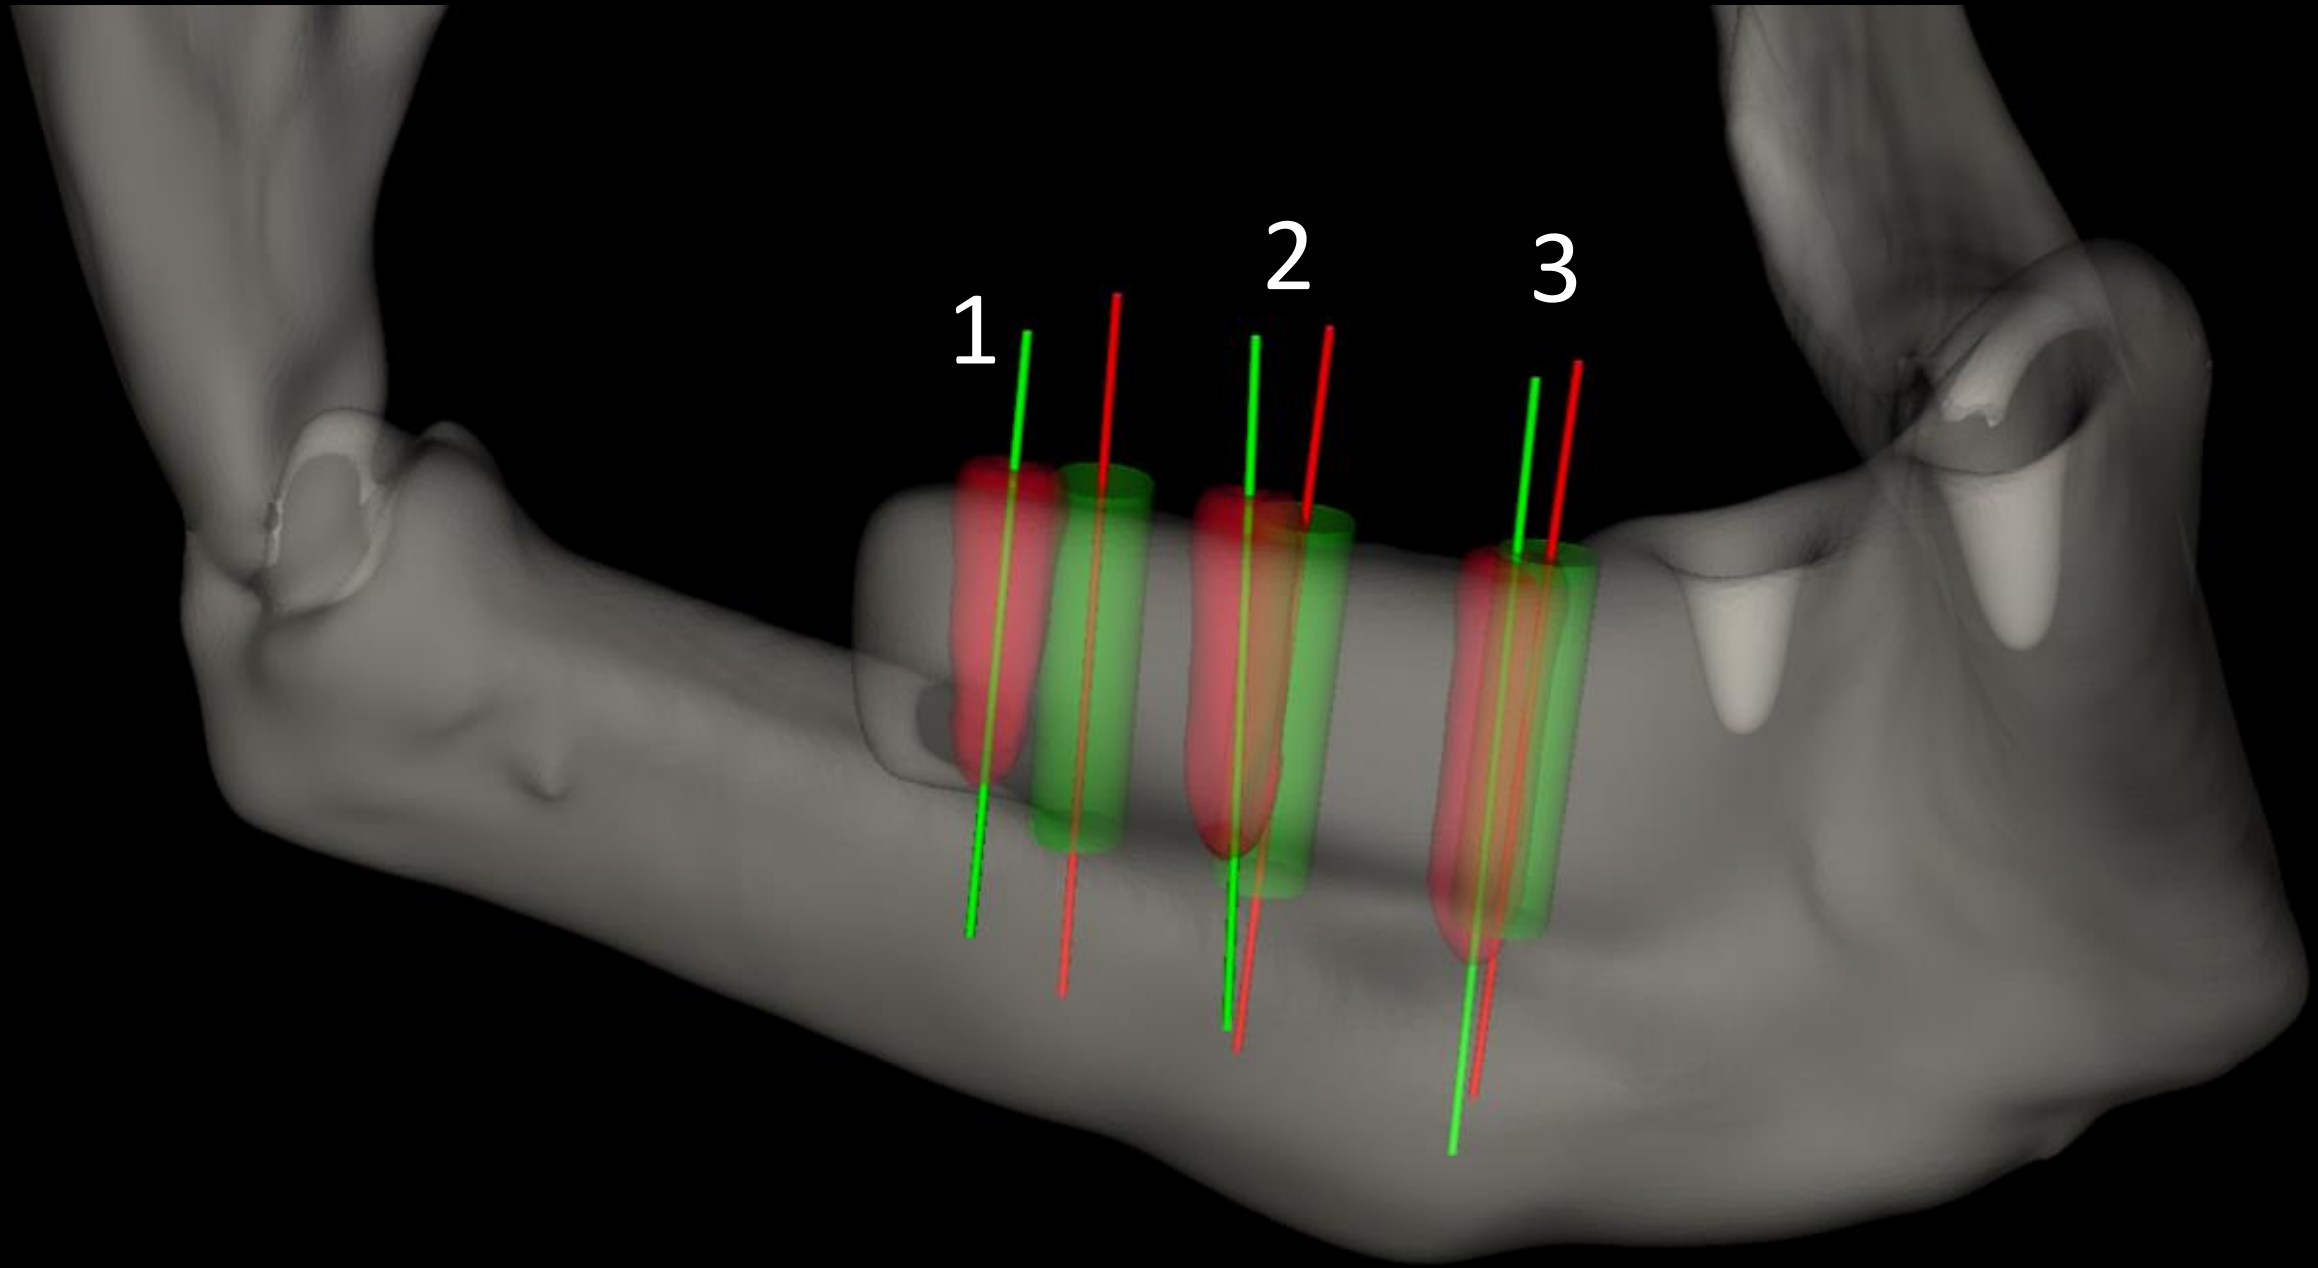

1

2

3

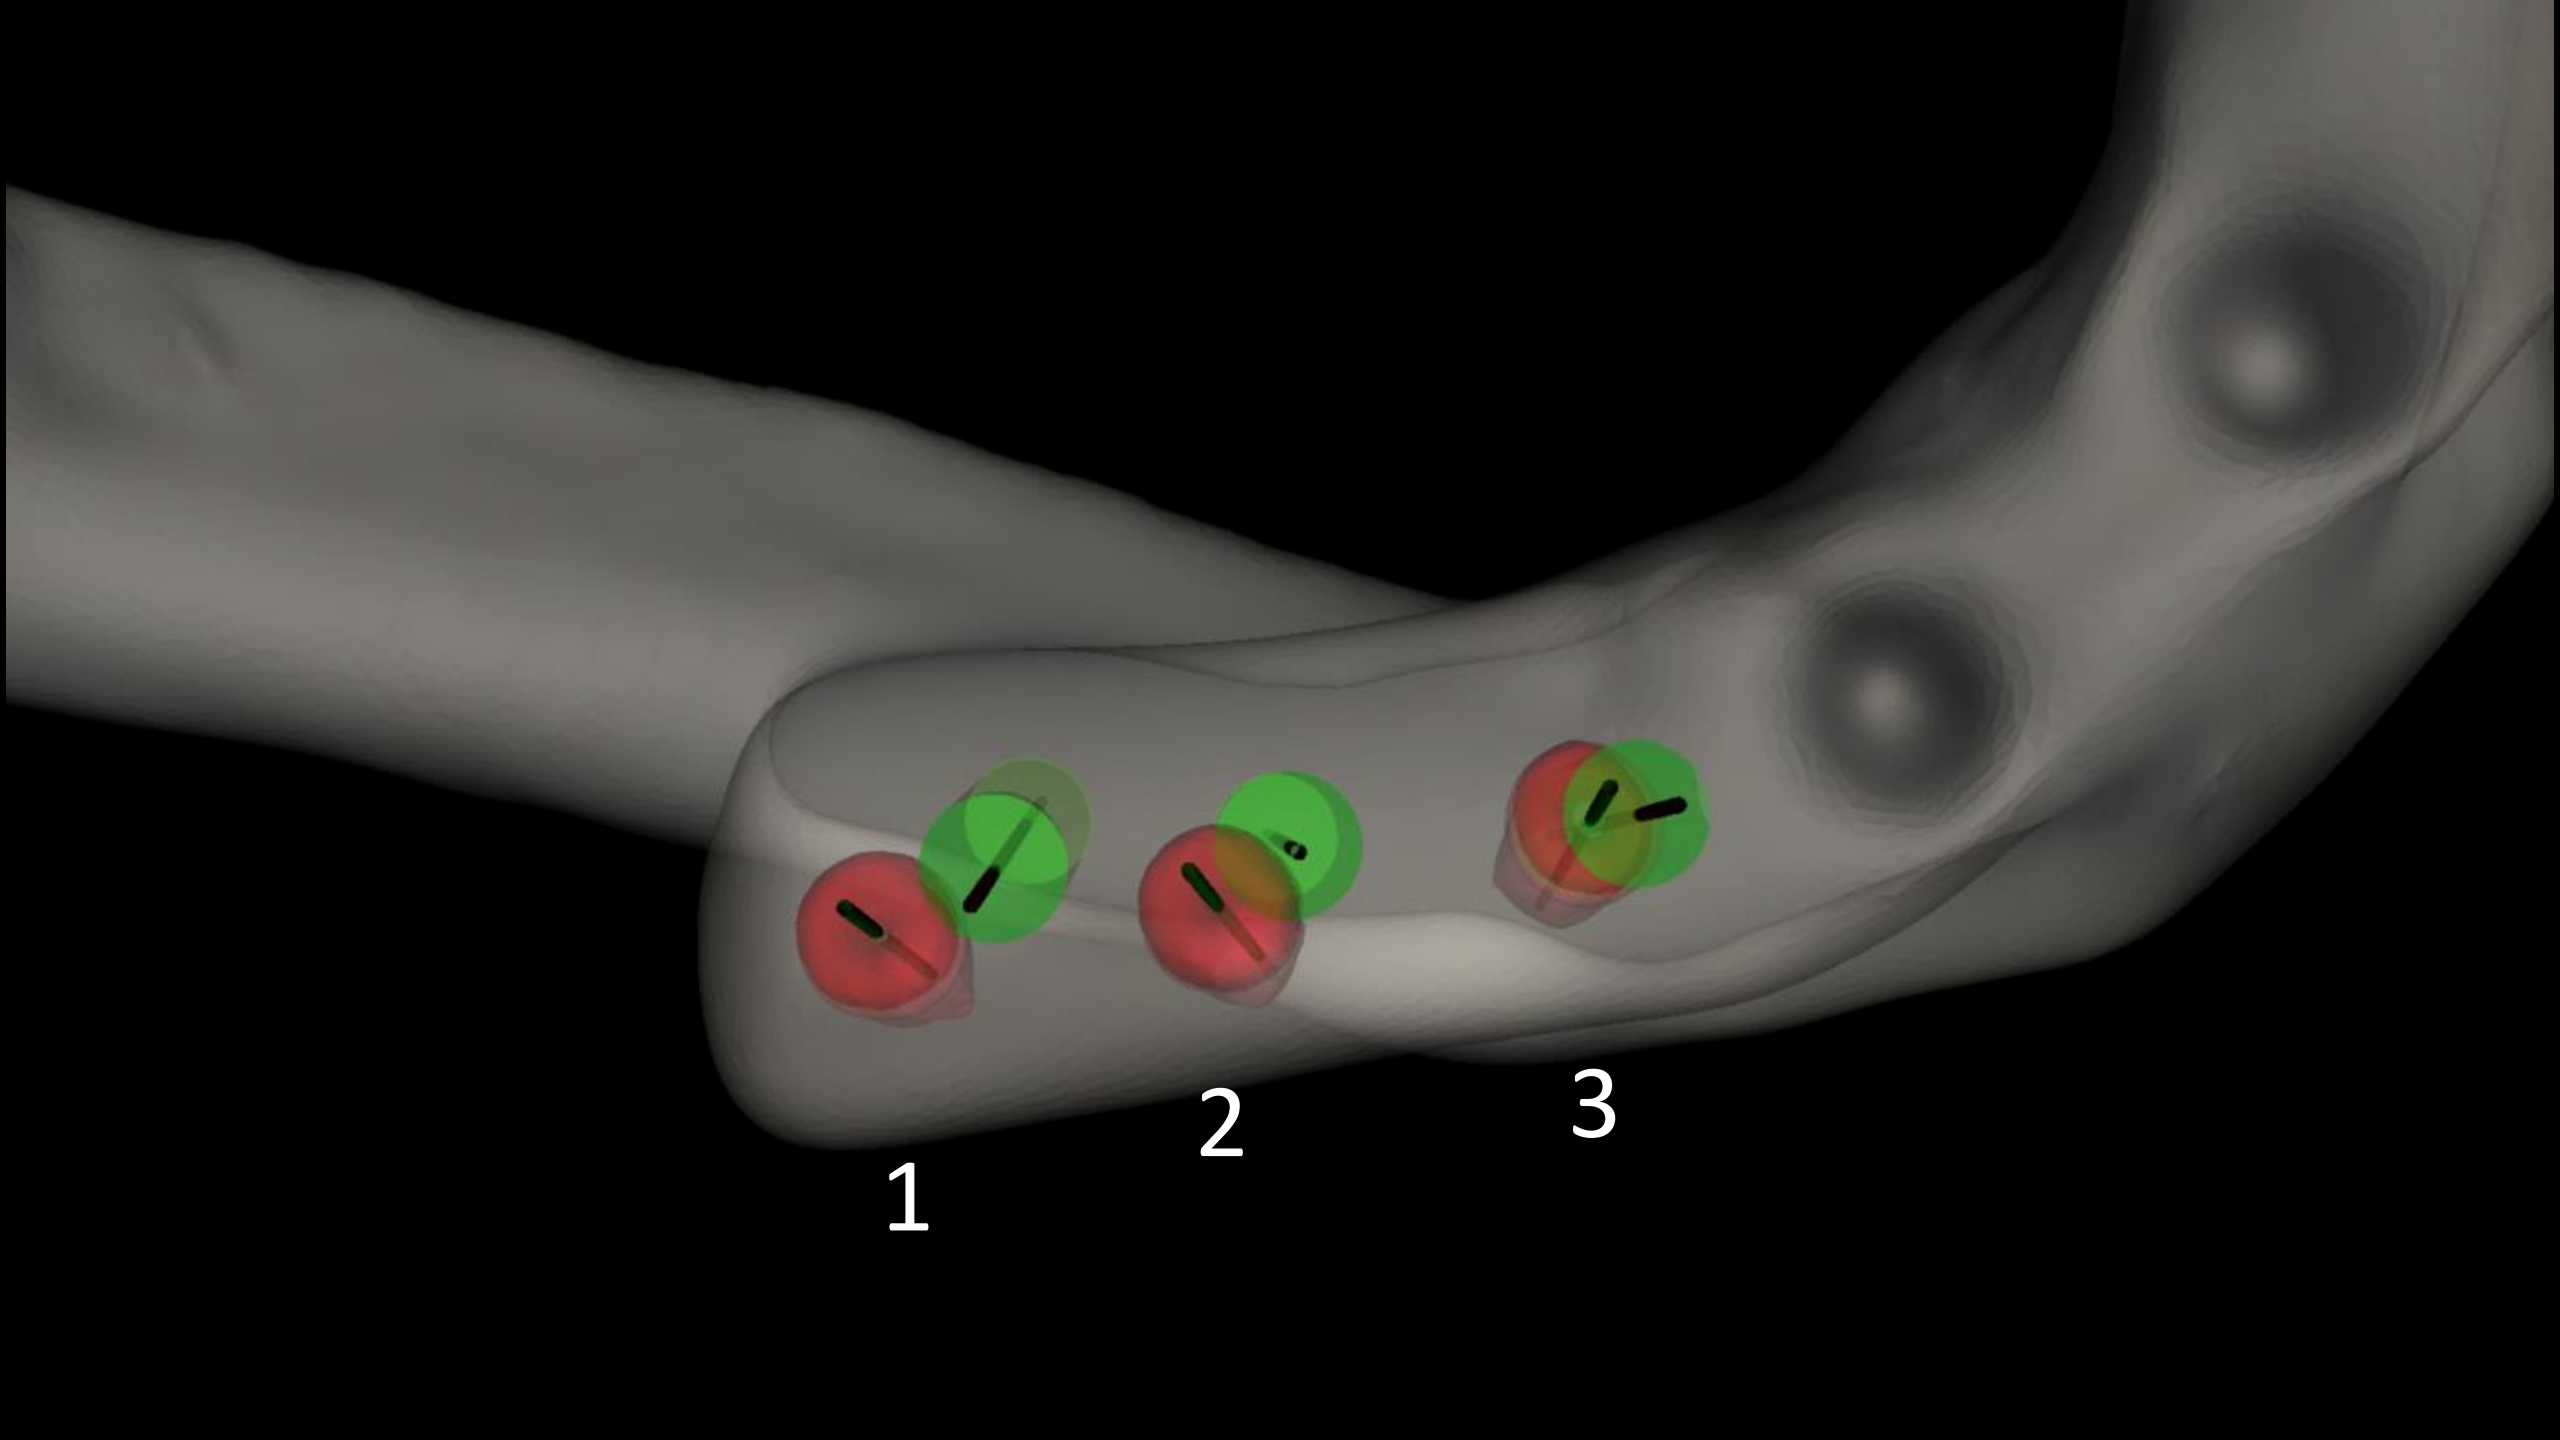

1

2

3

ION002 - INF

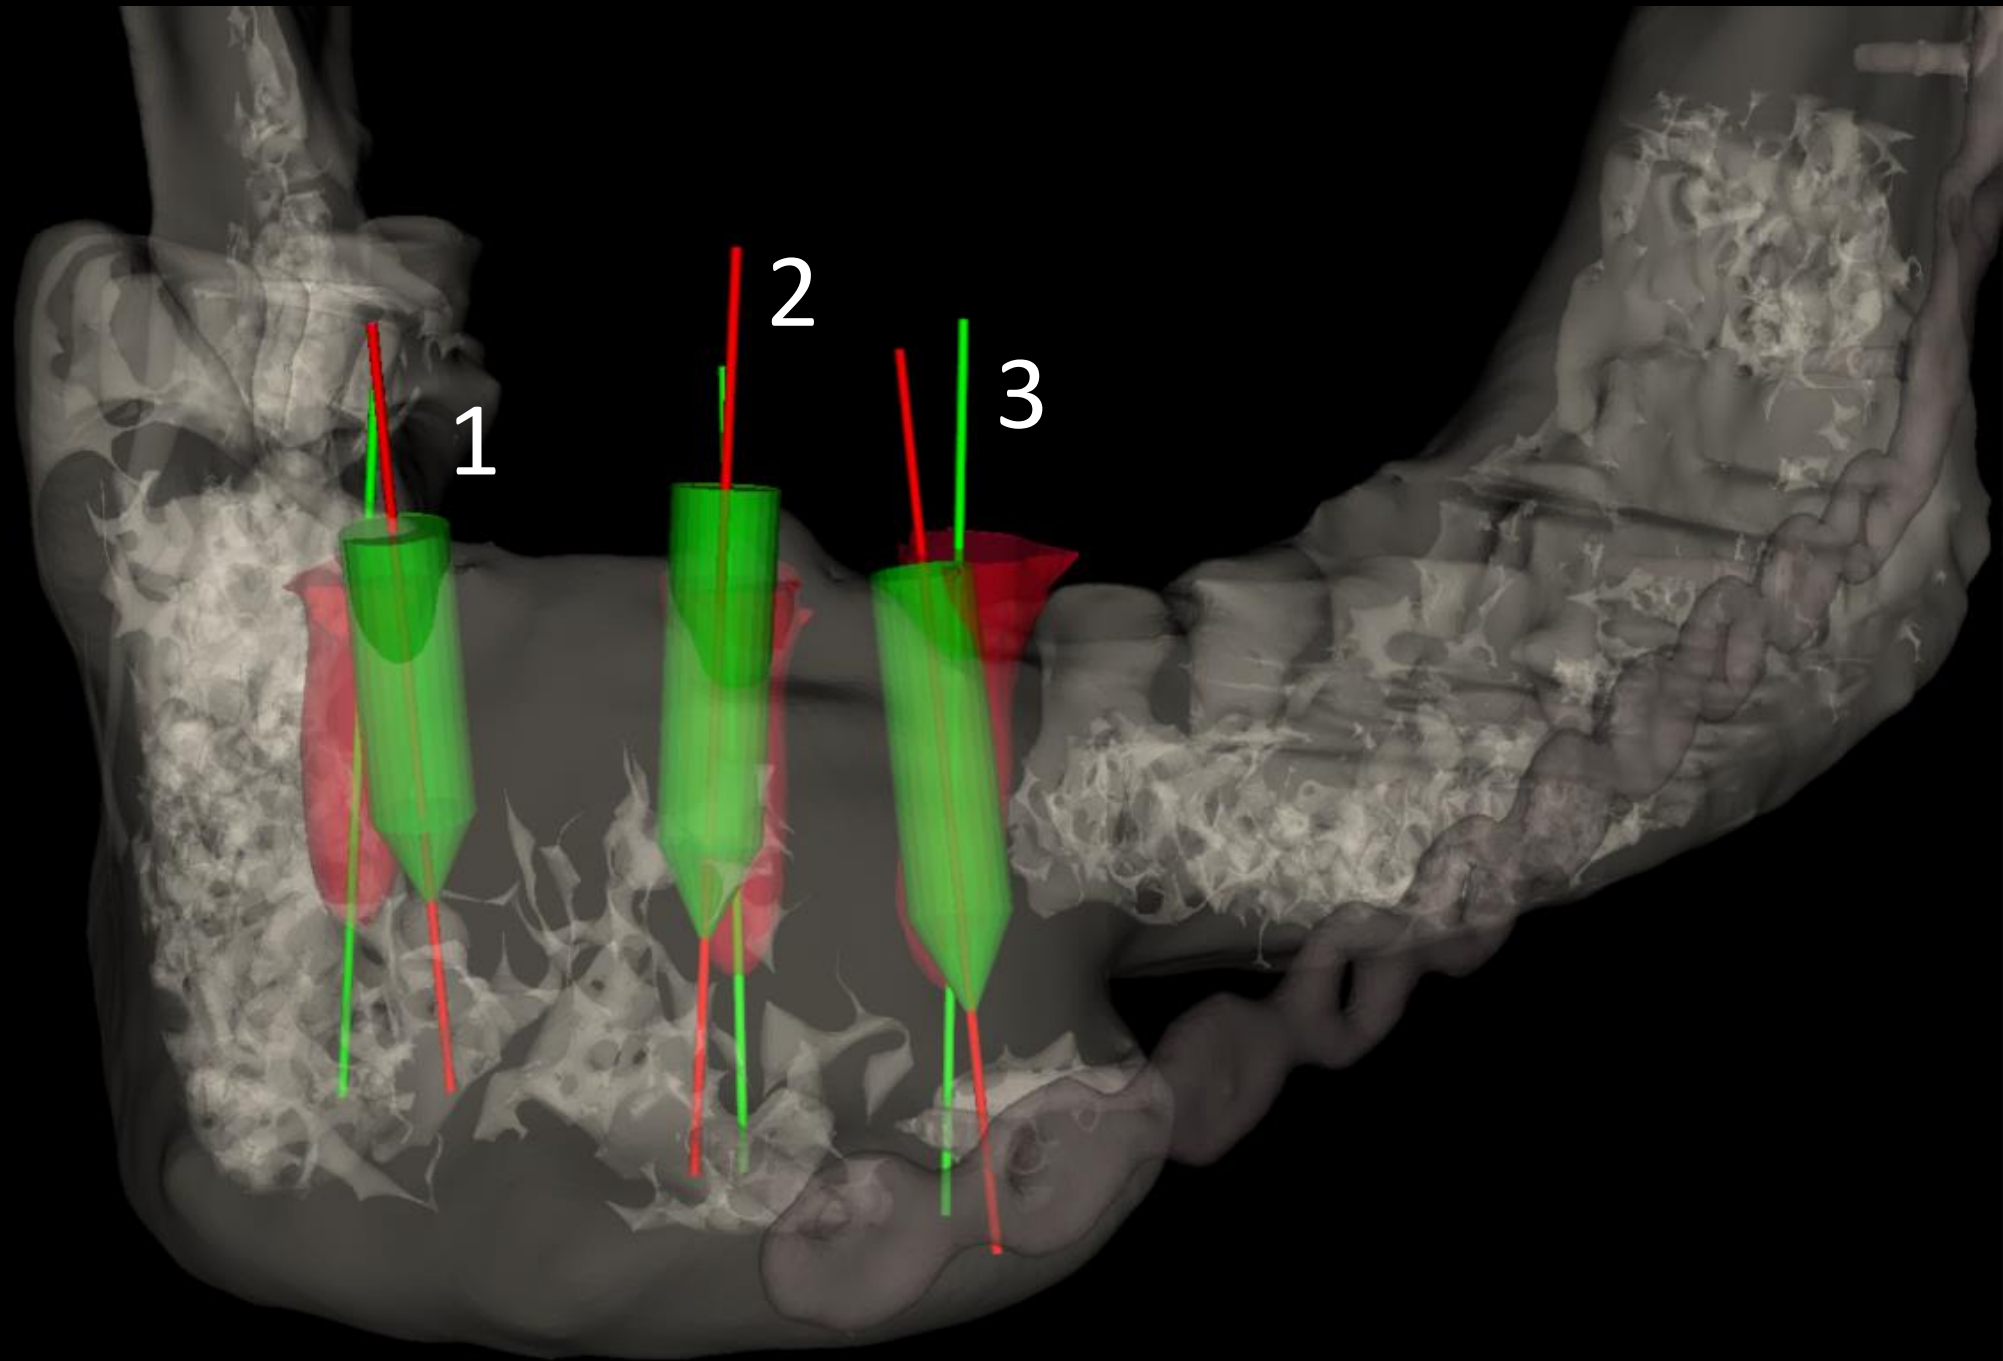

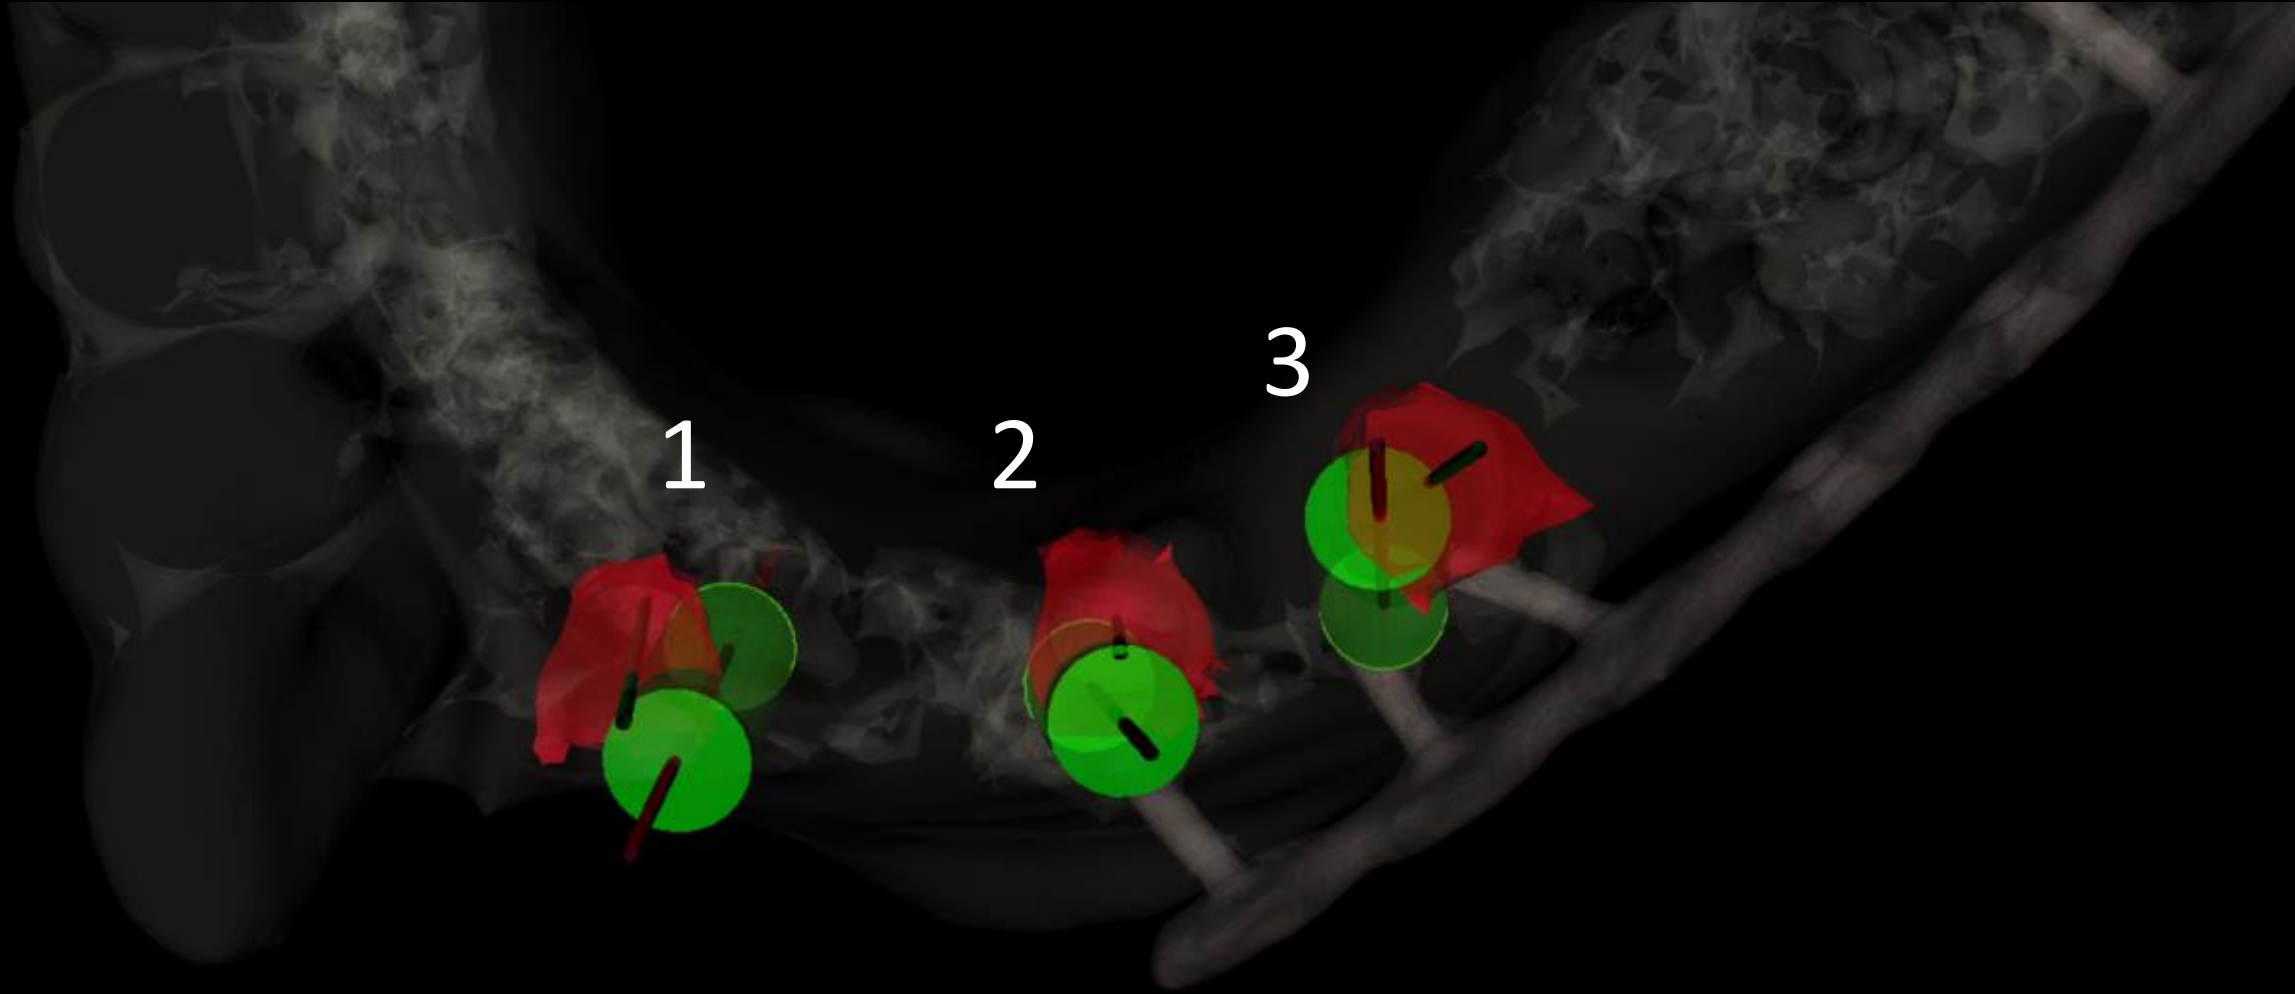

1

2

3

ION003 - INF

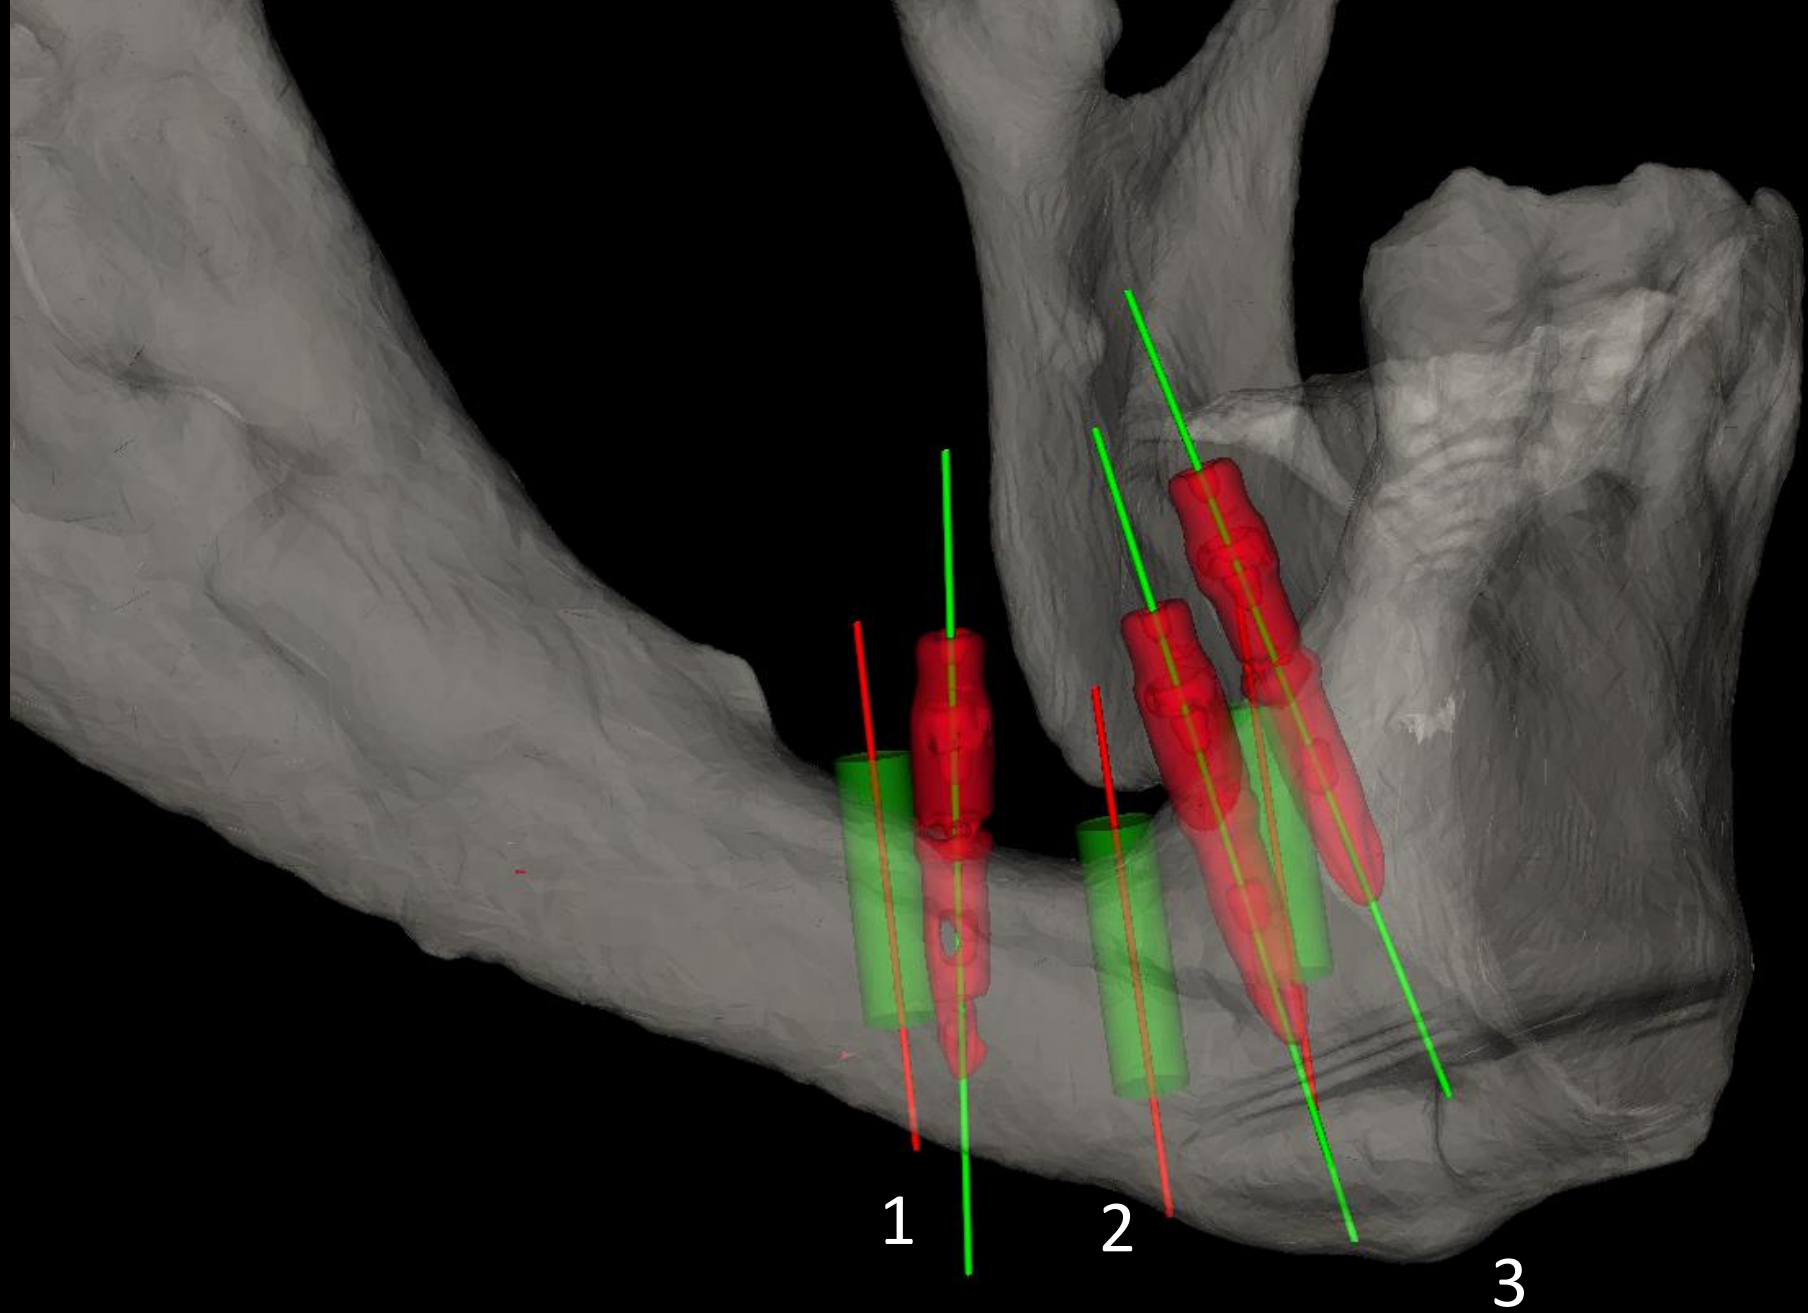

1

2

3



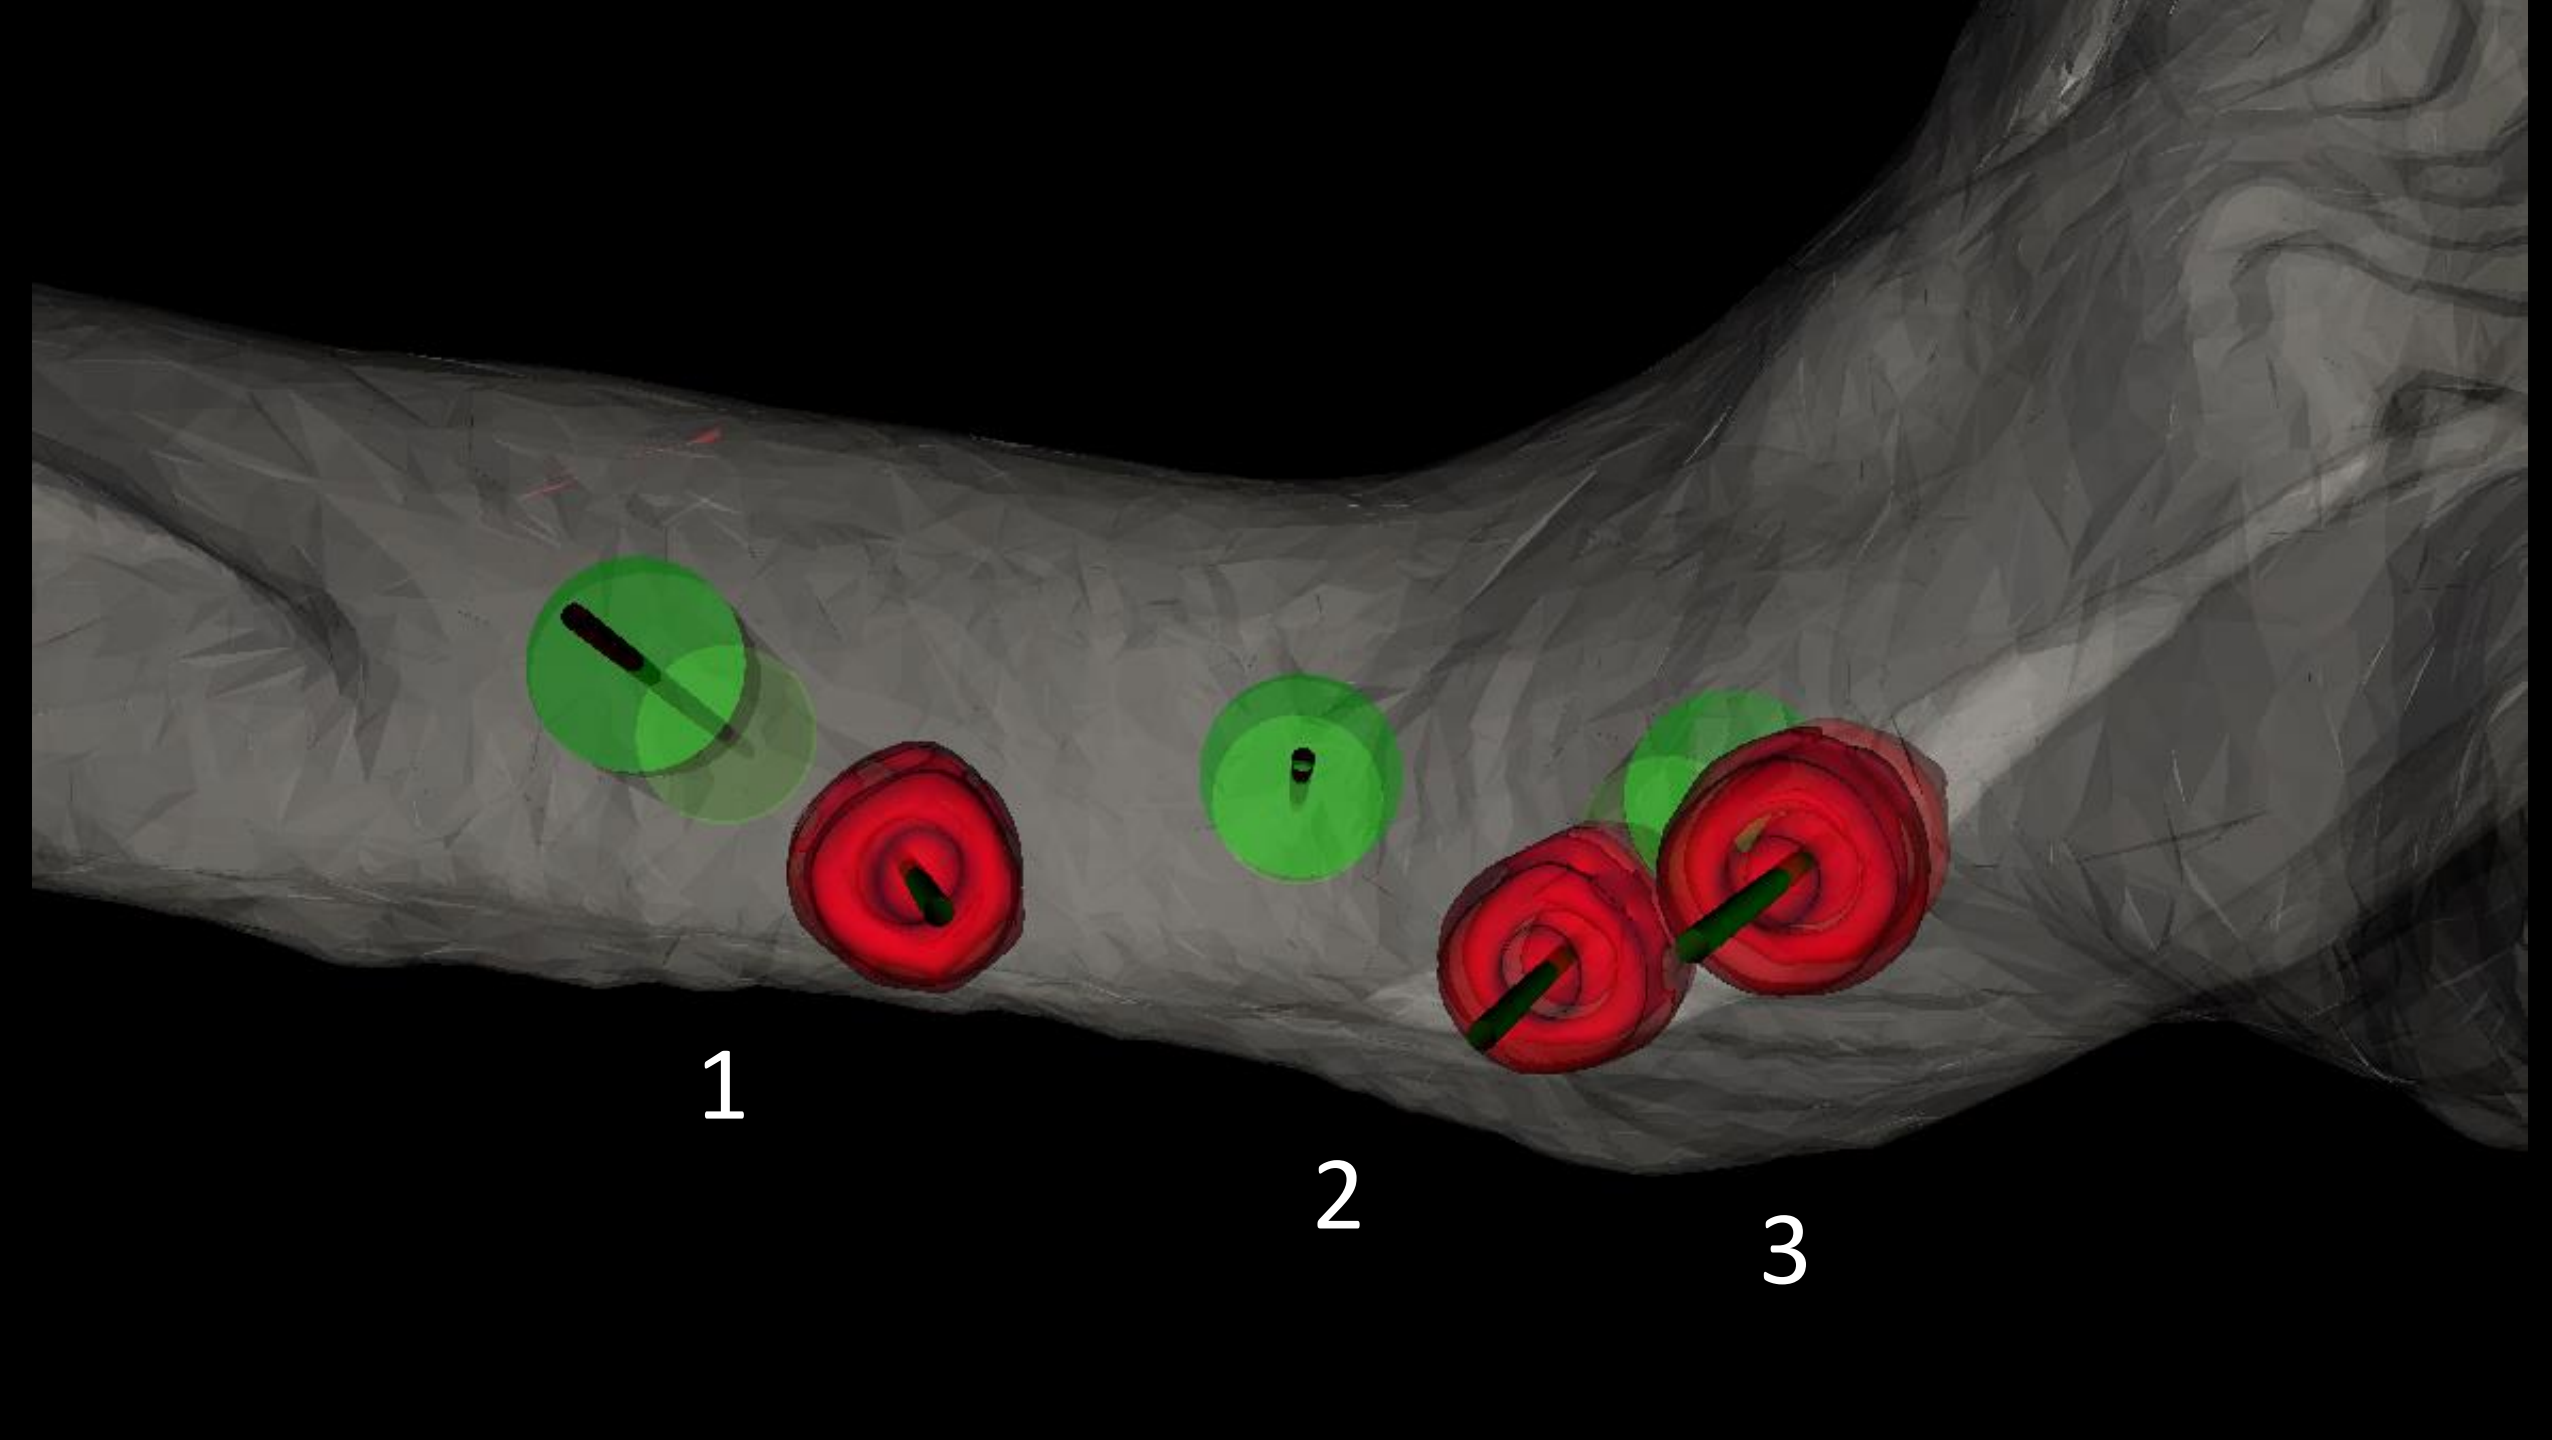

ION004 - INF

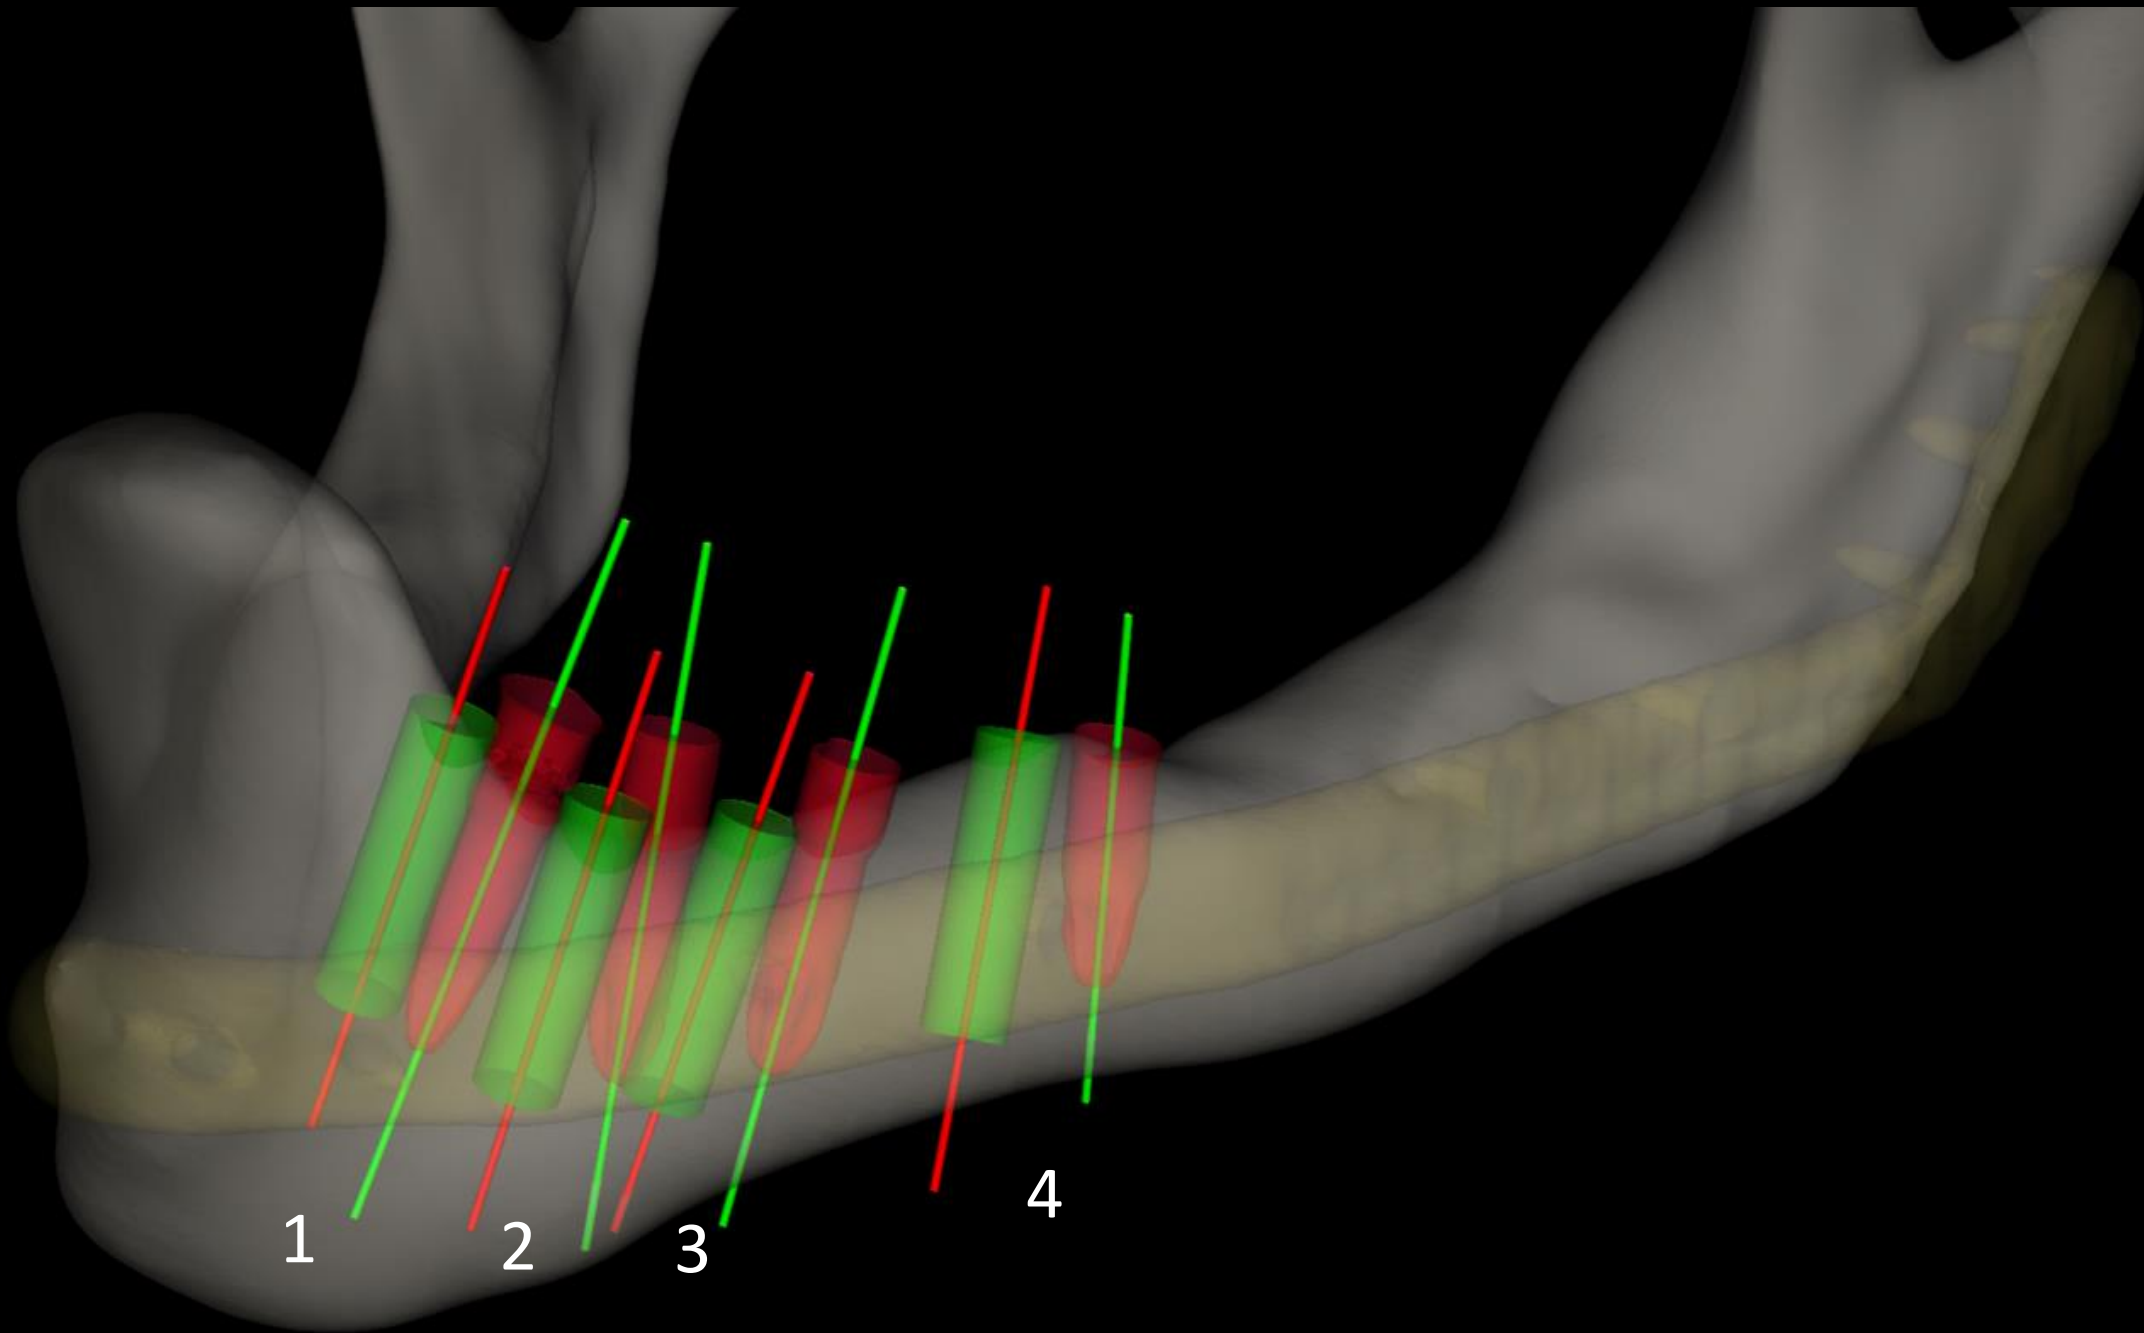

1

2

3

4

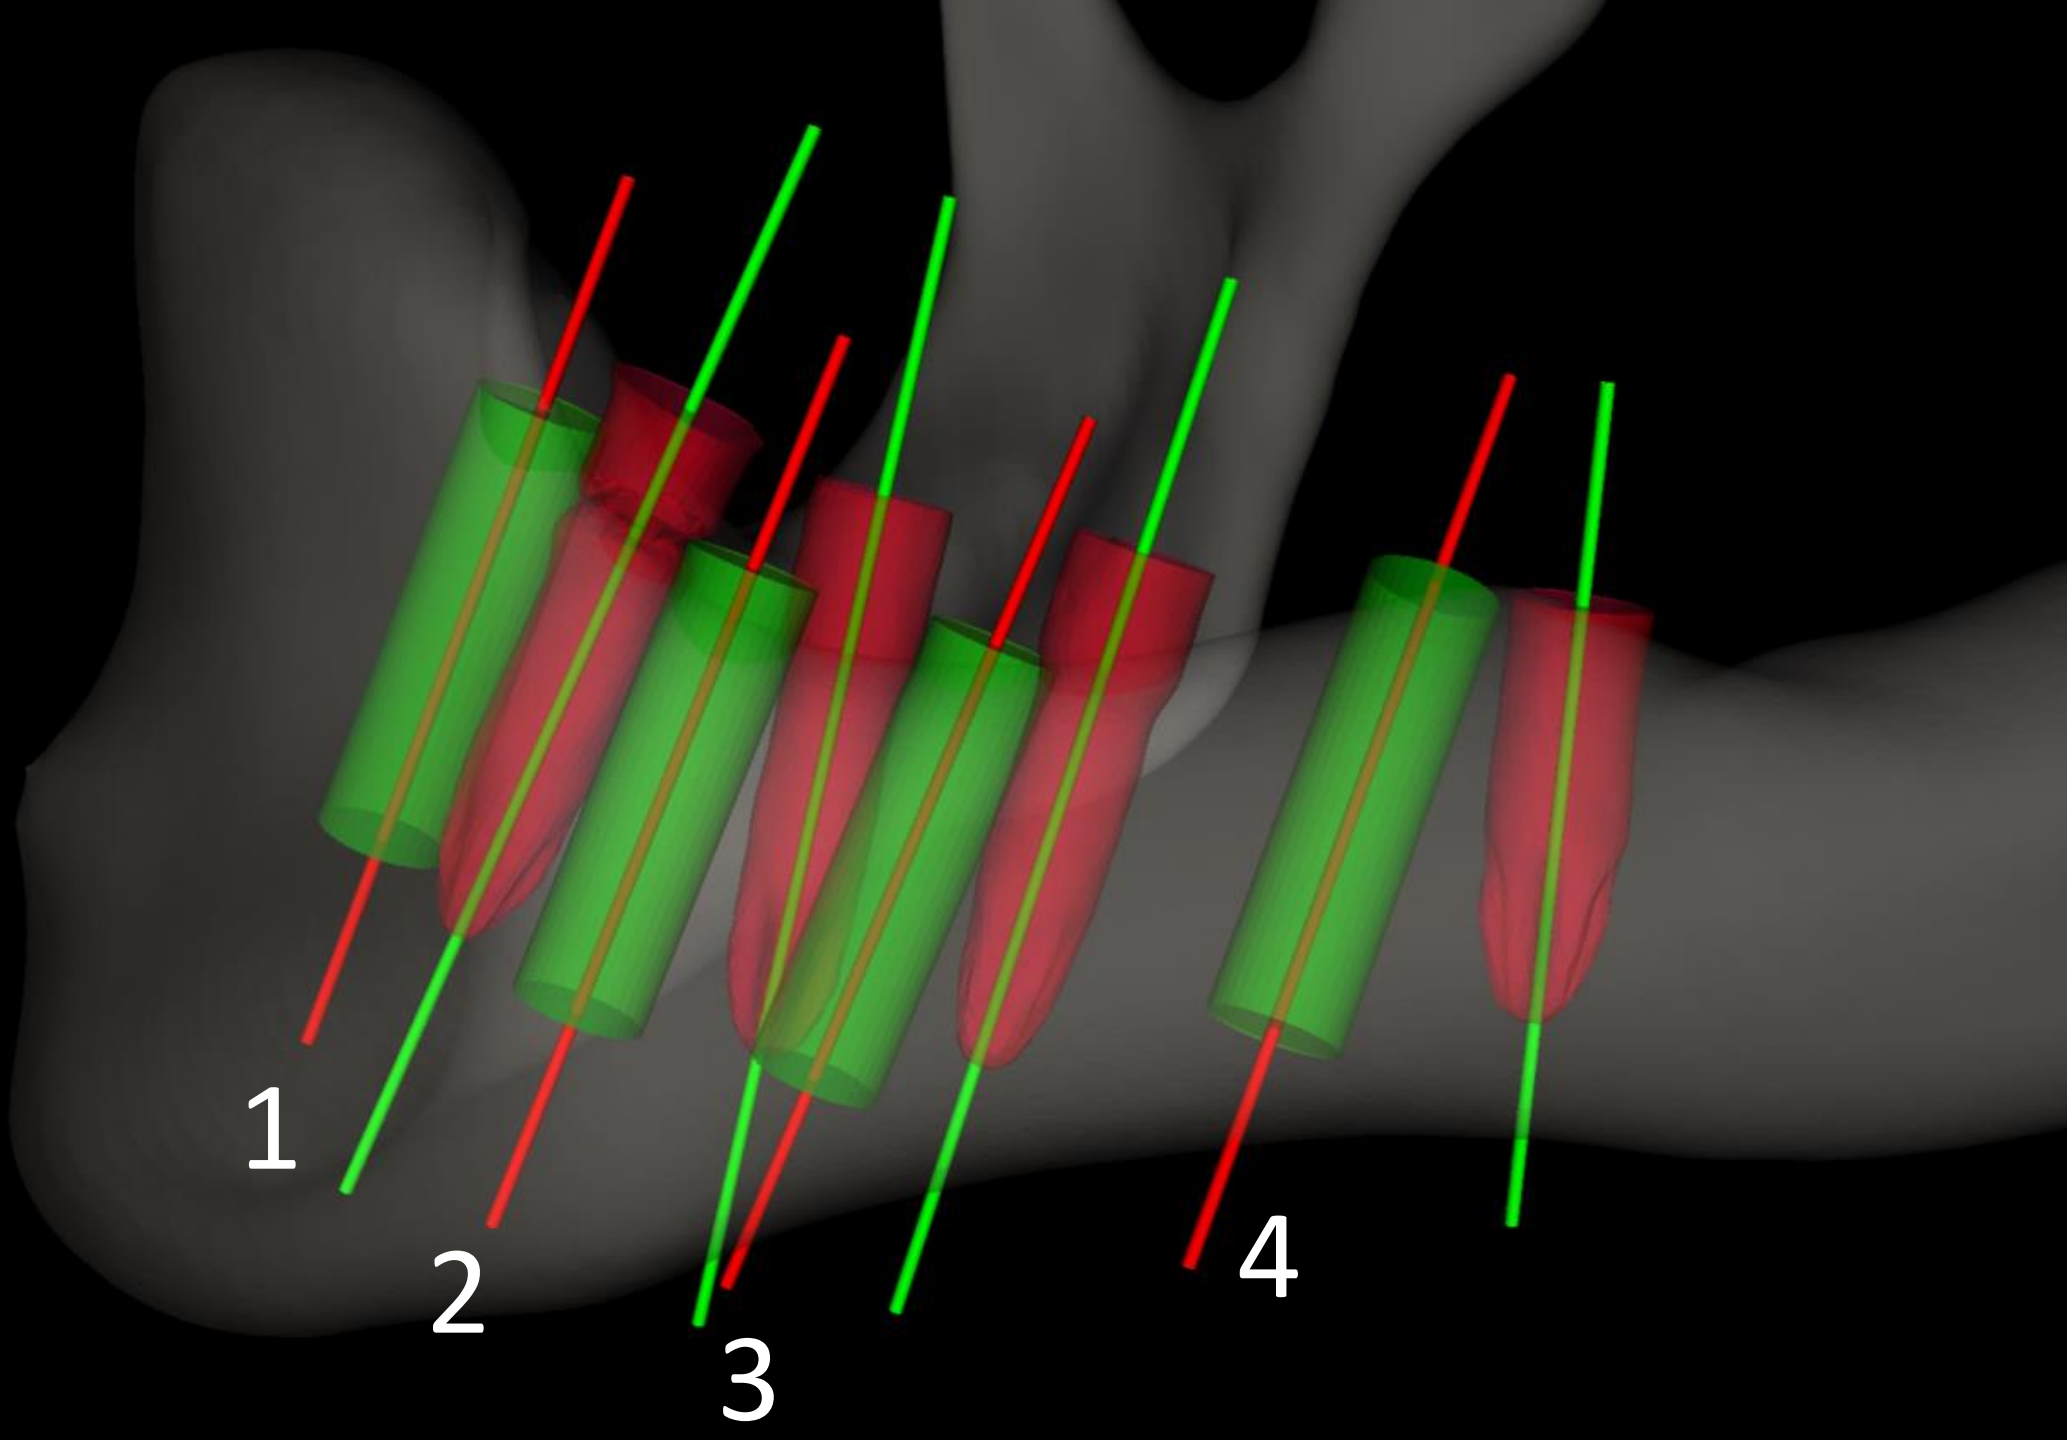

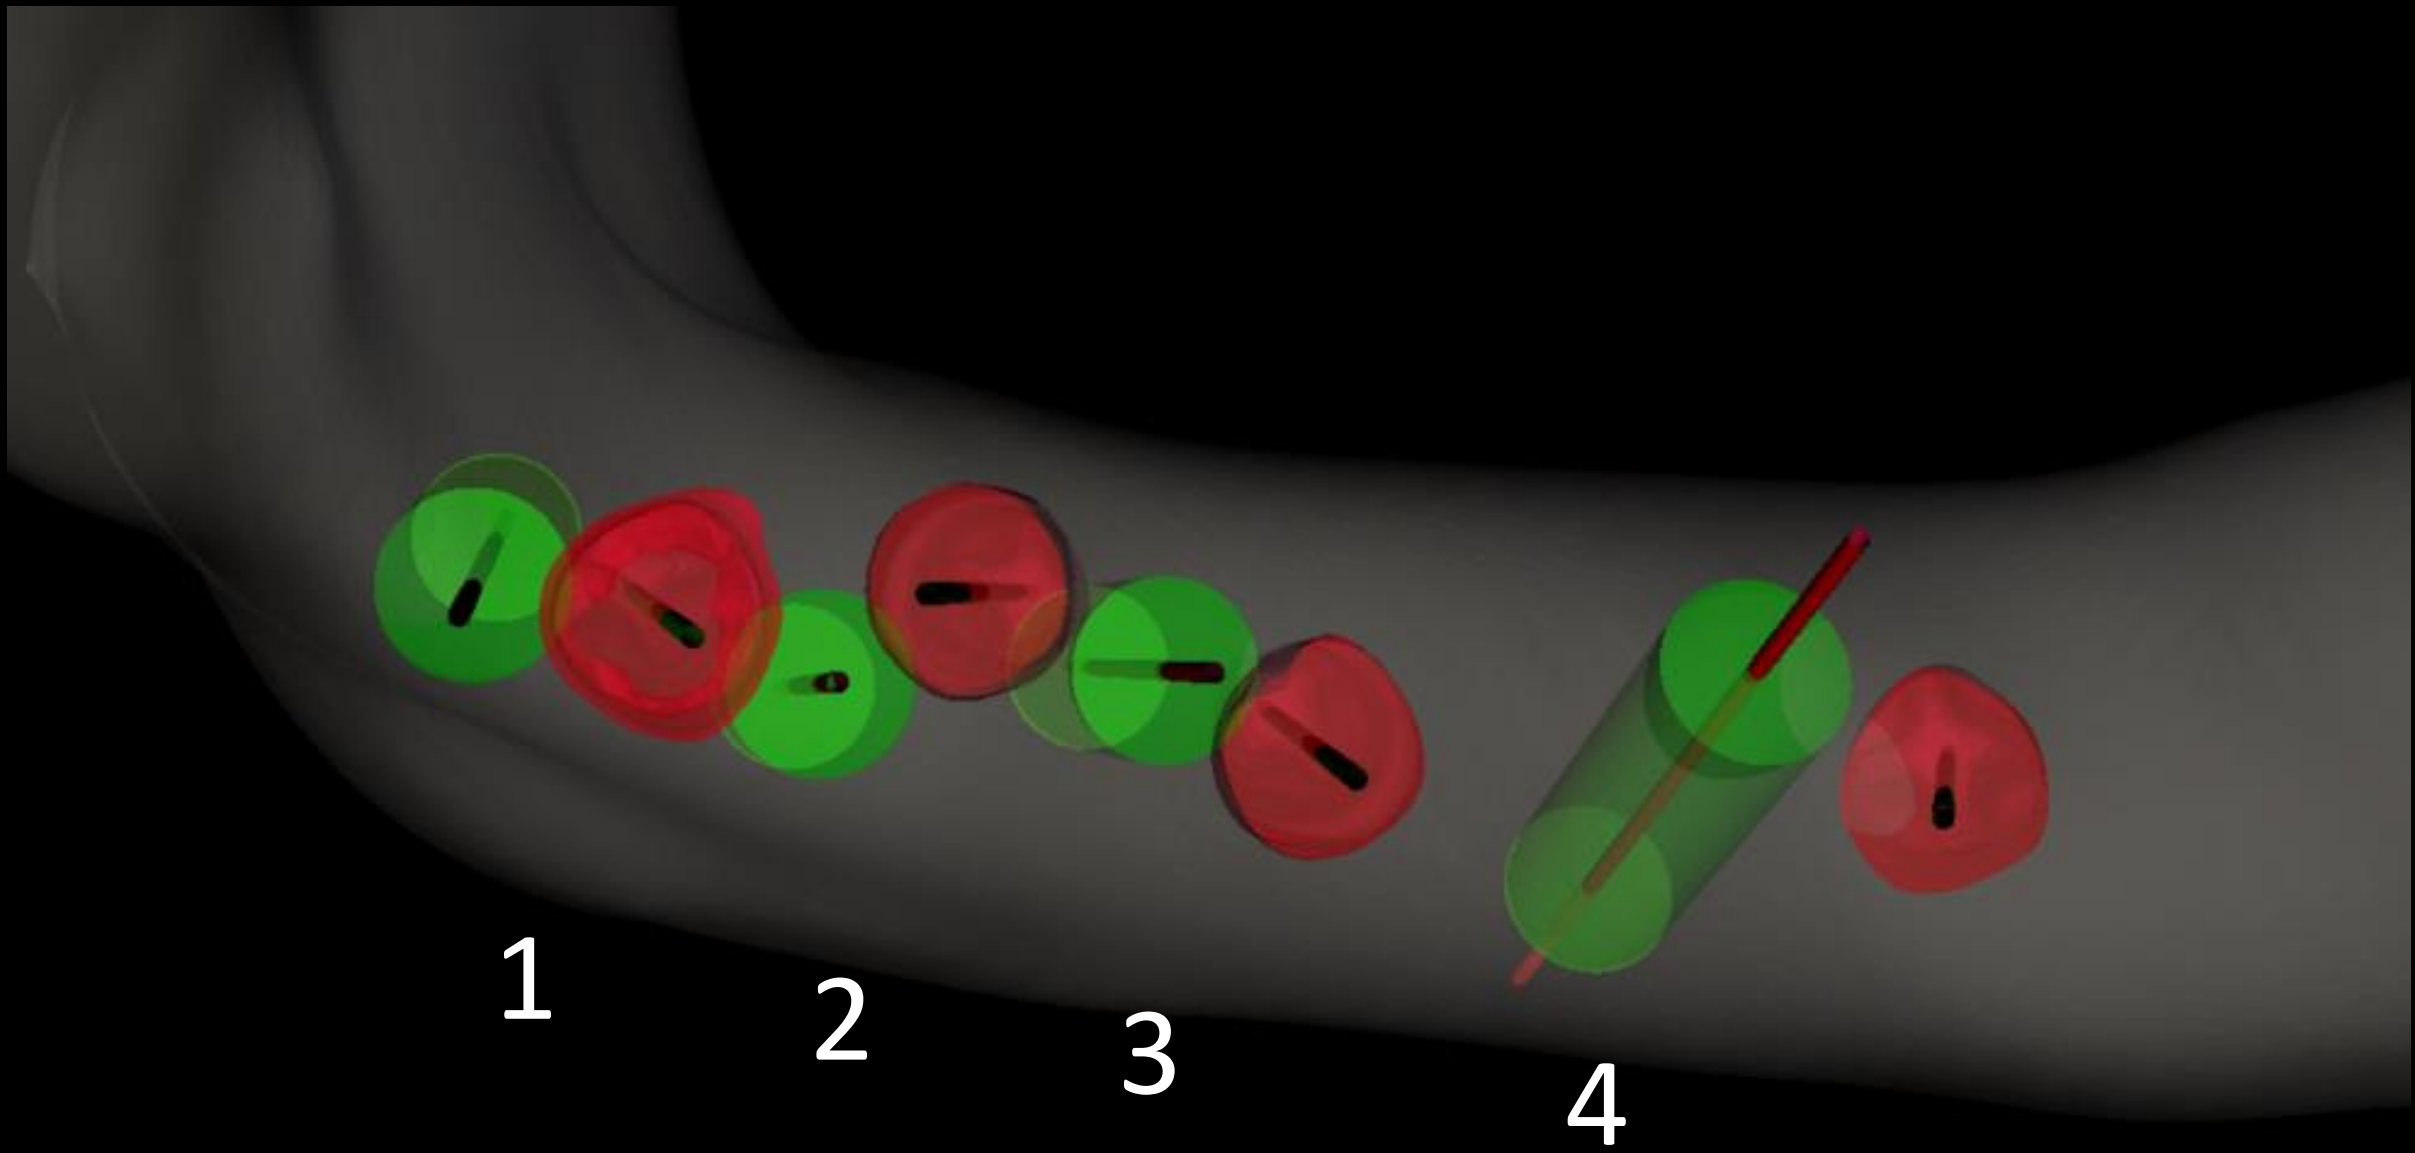

ION005 - INF

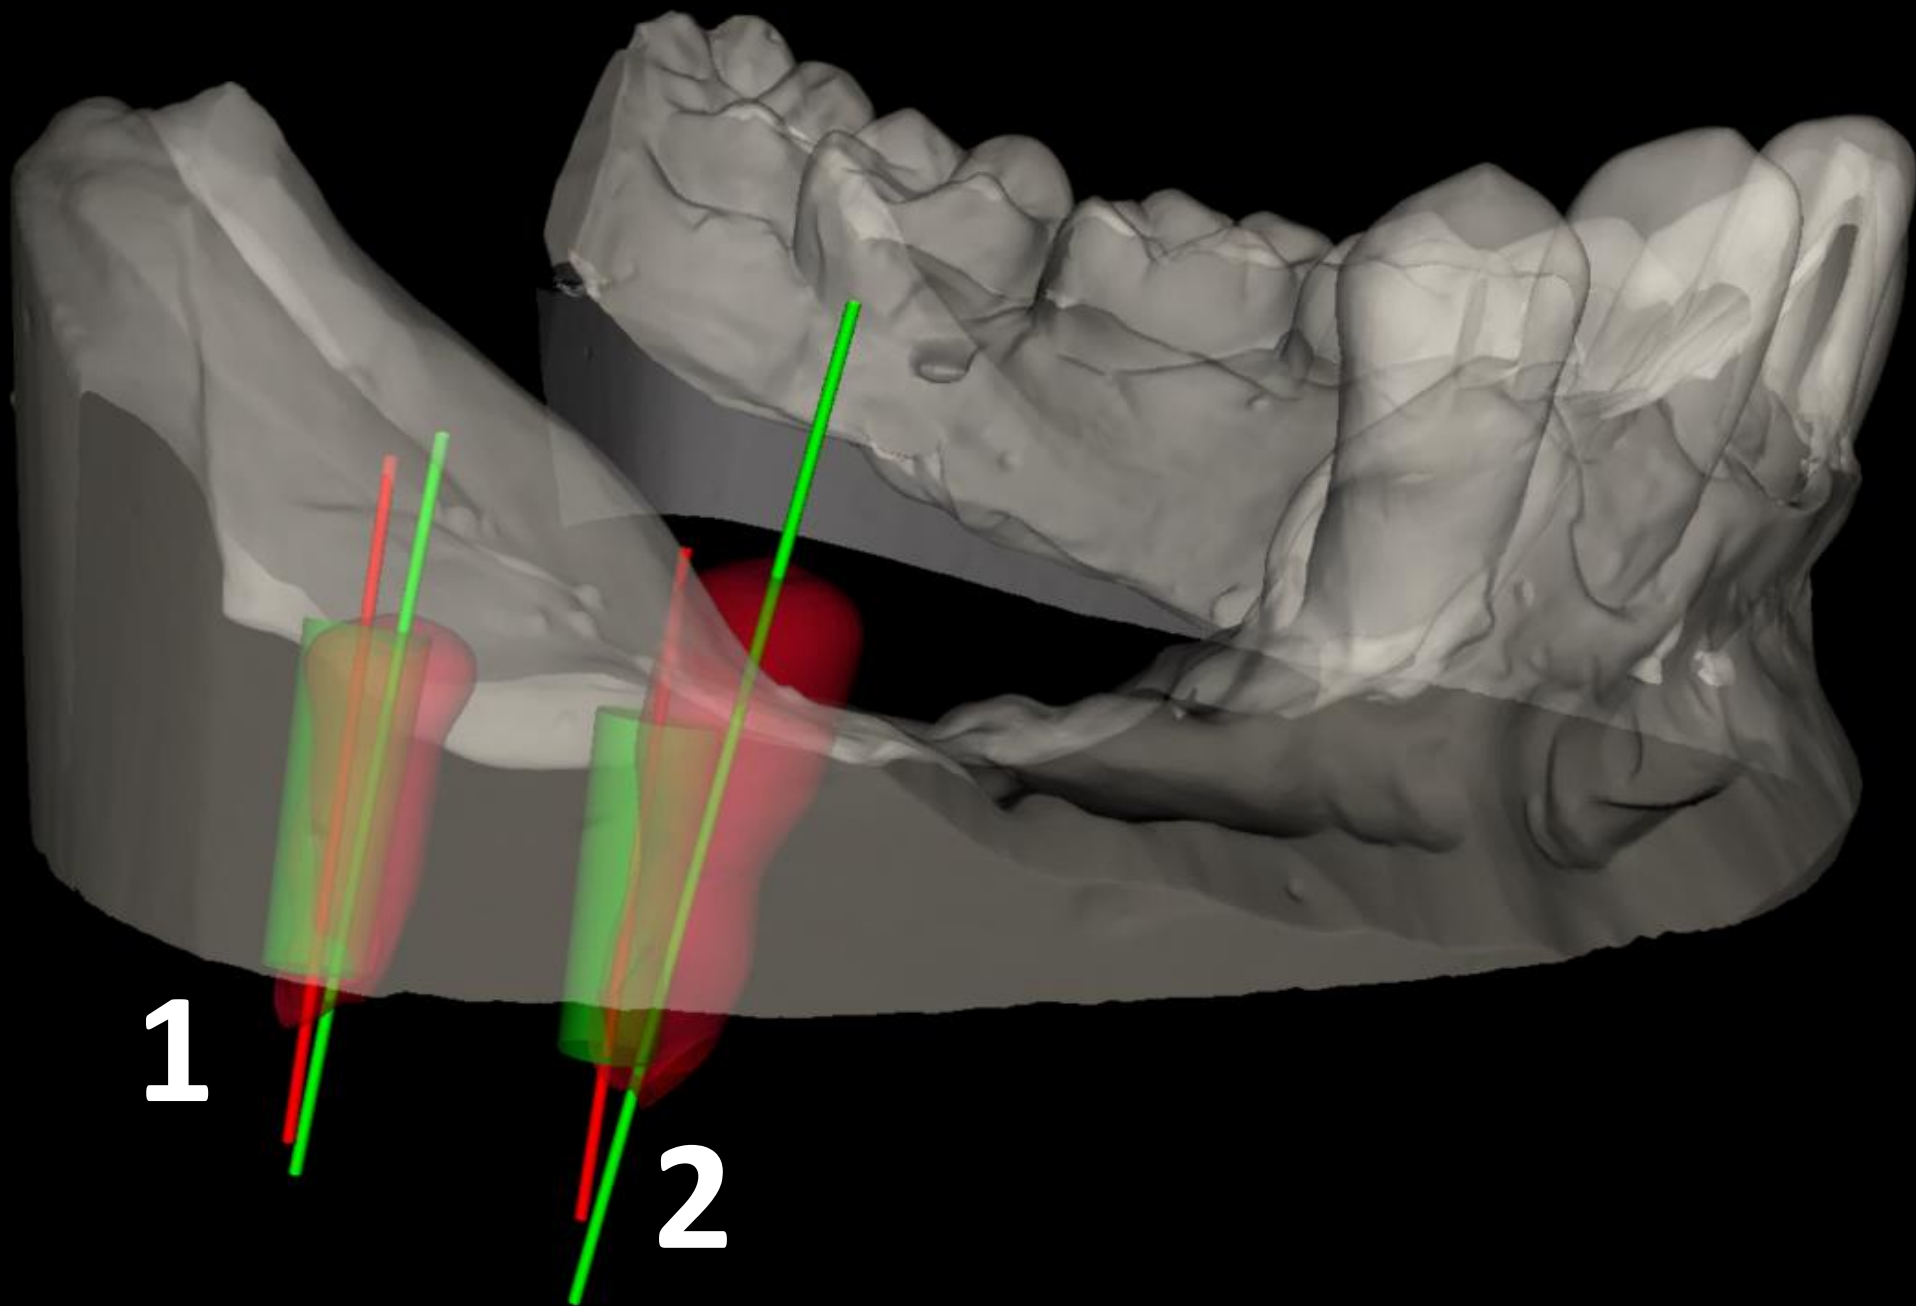

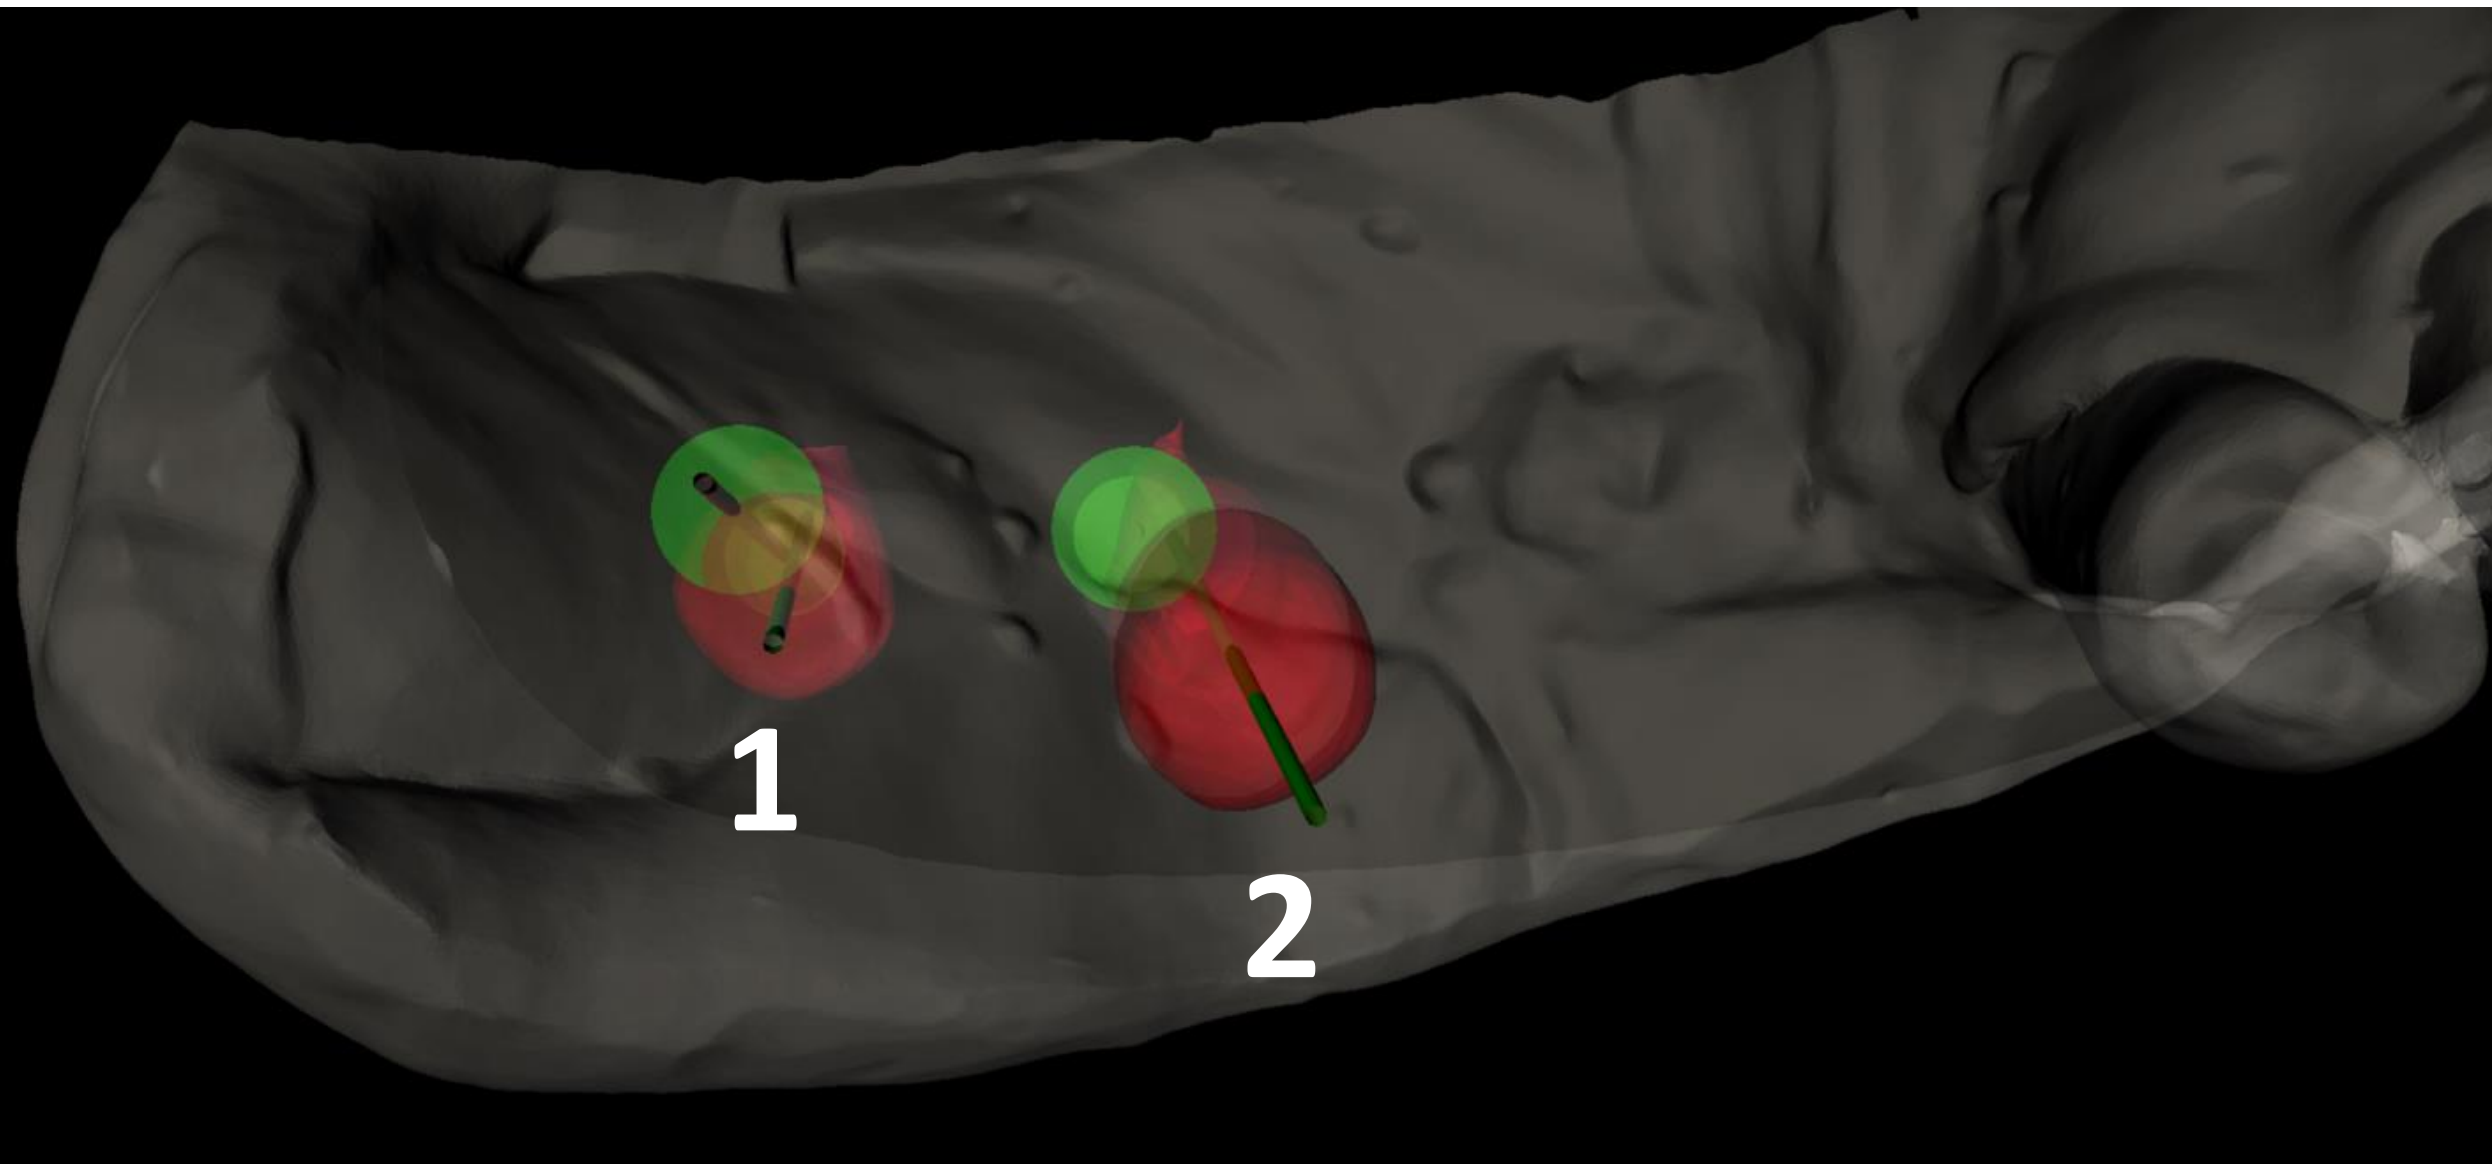

1

2



ION006 - INF

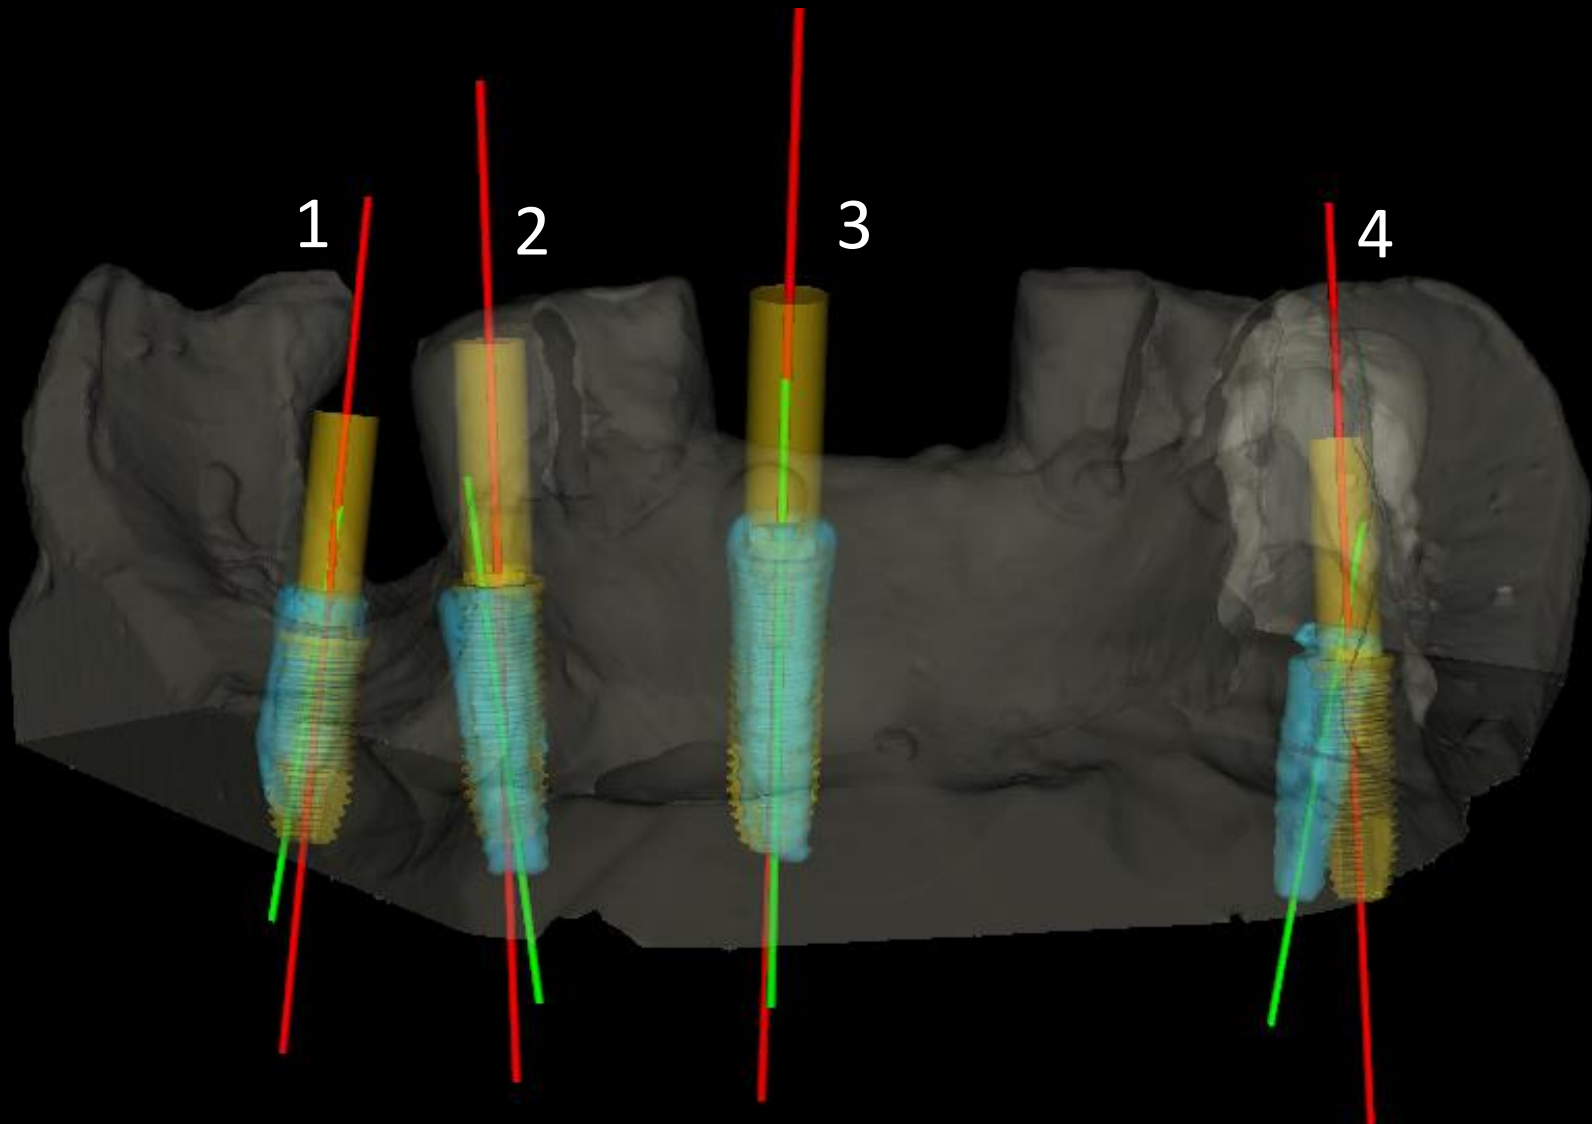

Implants VSP

Implants CT post

Trajectory VSP

Trajectory CT post

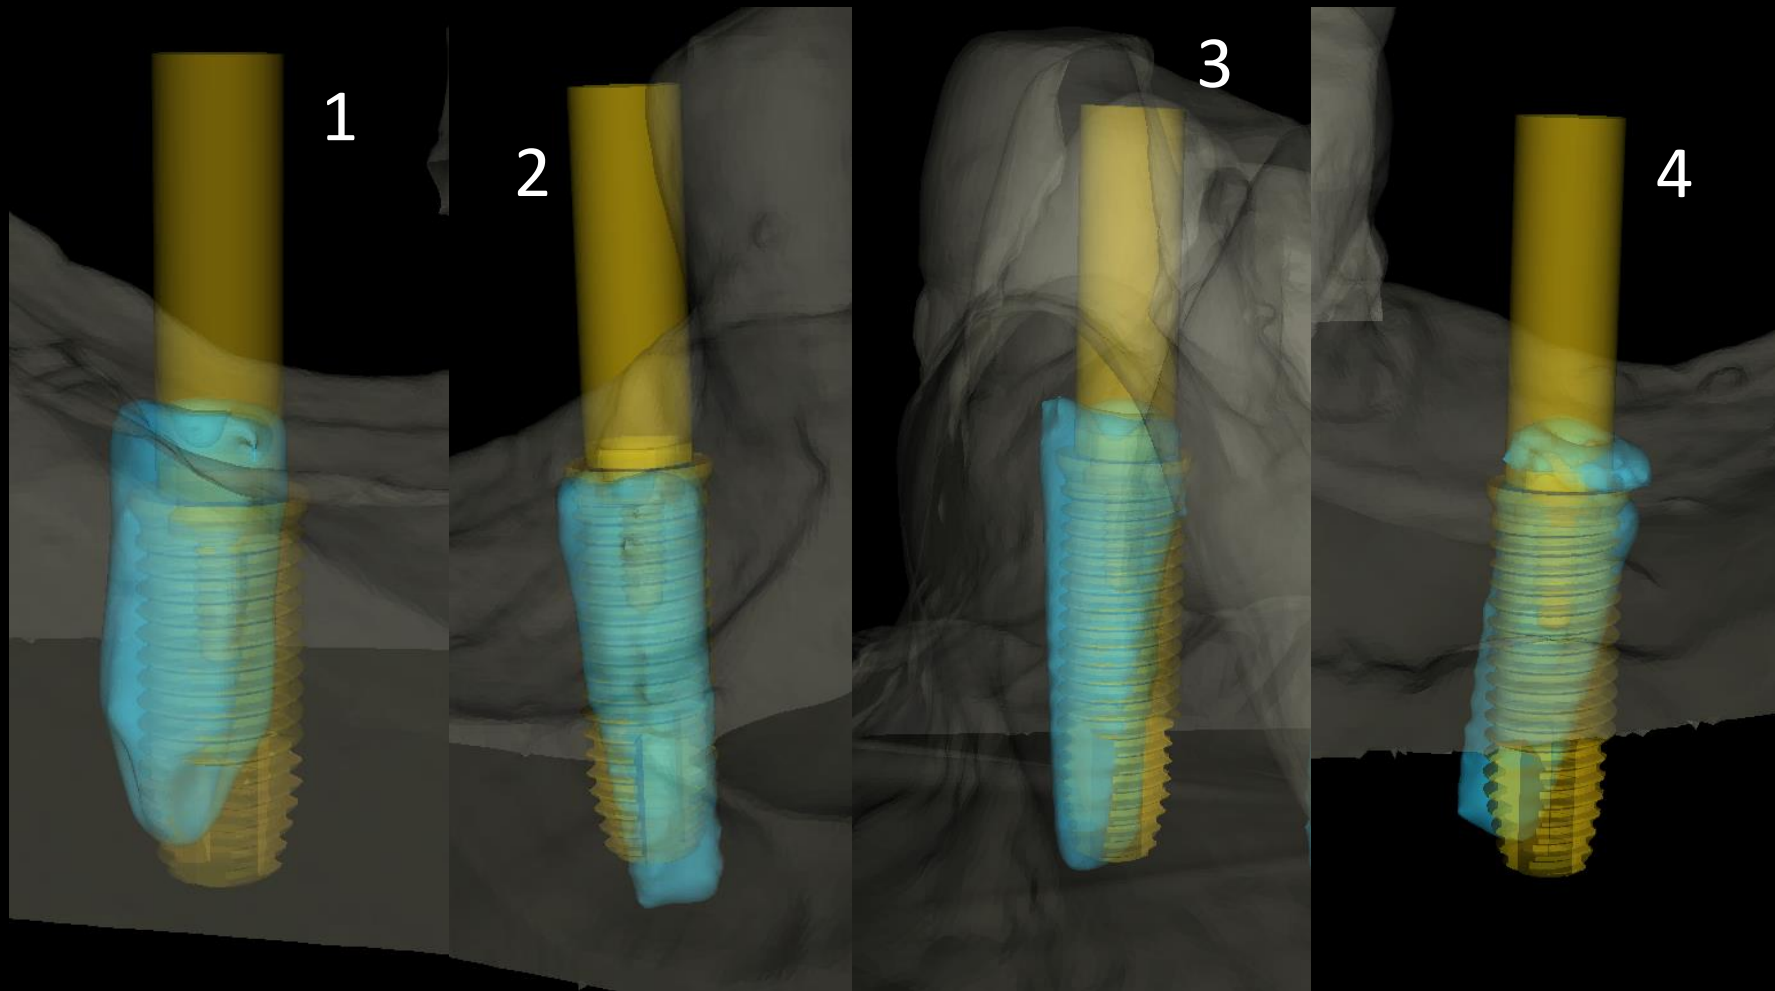

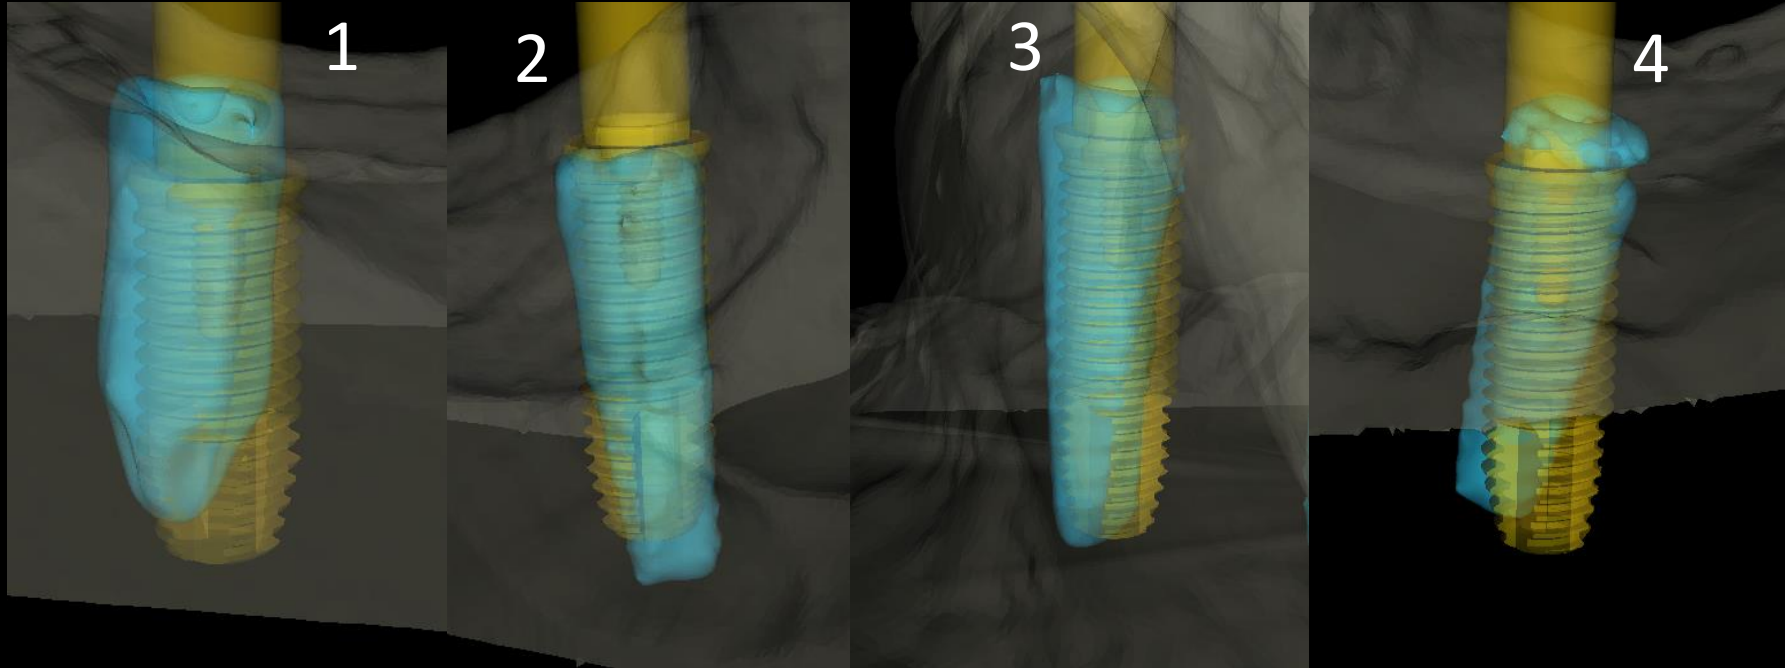

ION006 - SUP

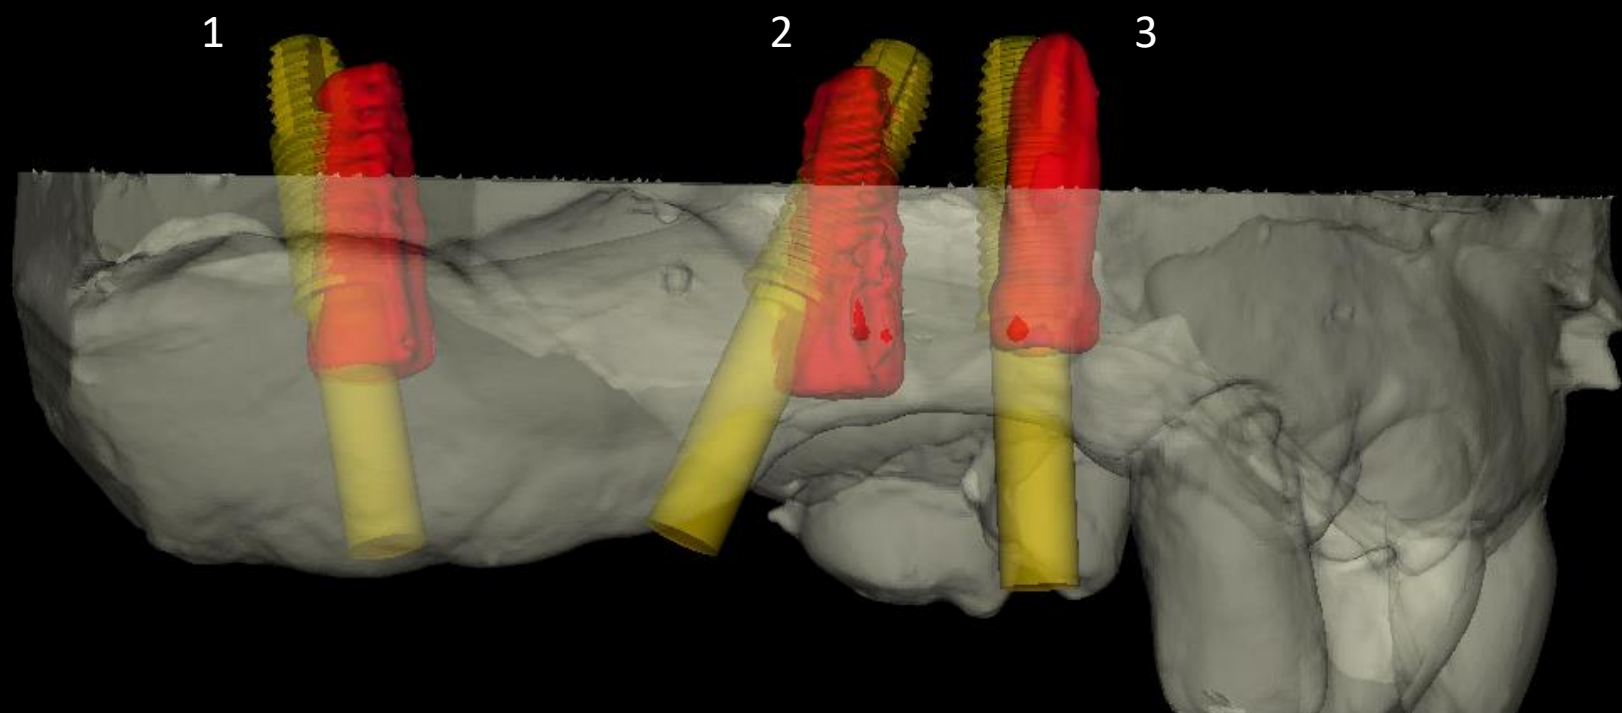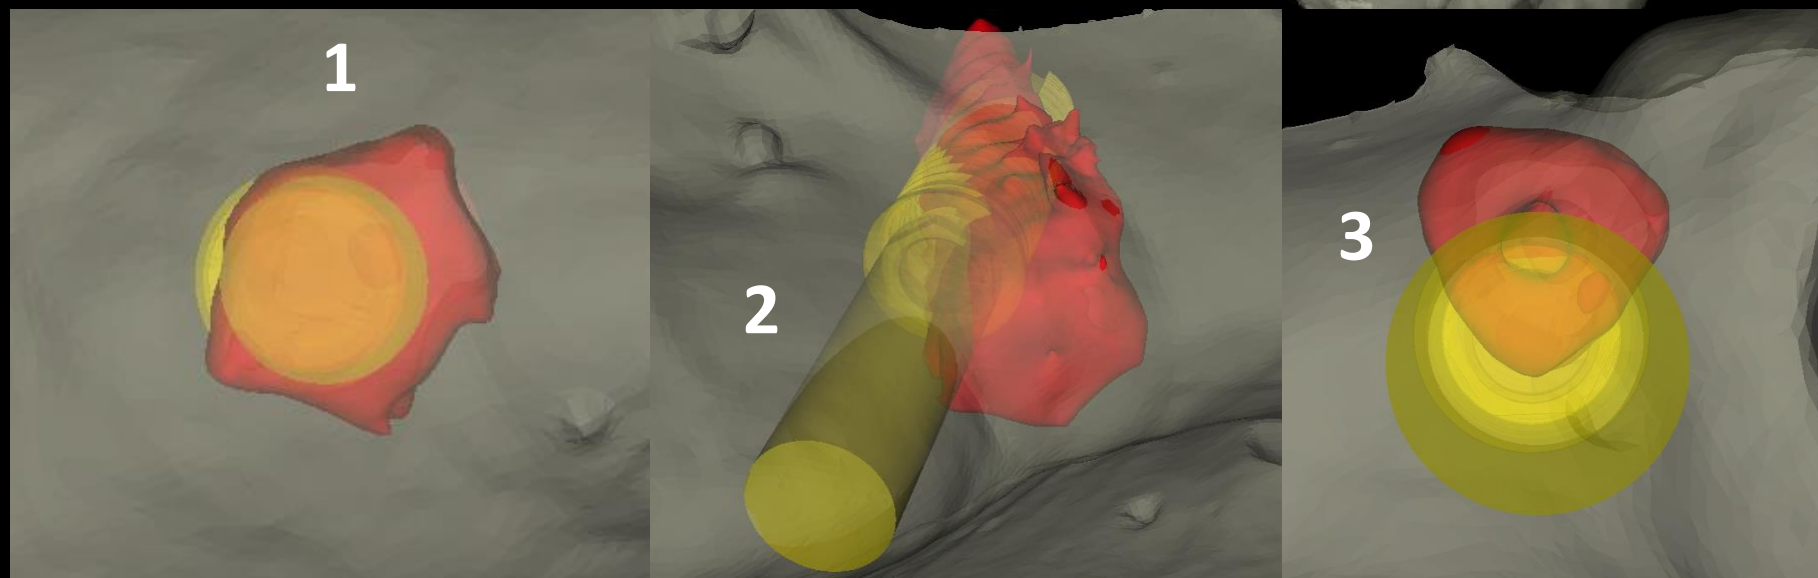

Implants VSP

Implants CT post

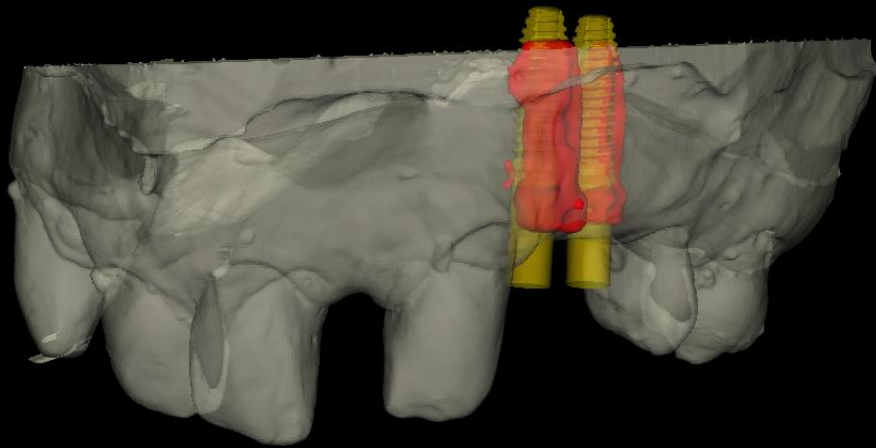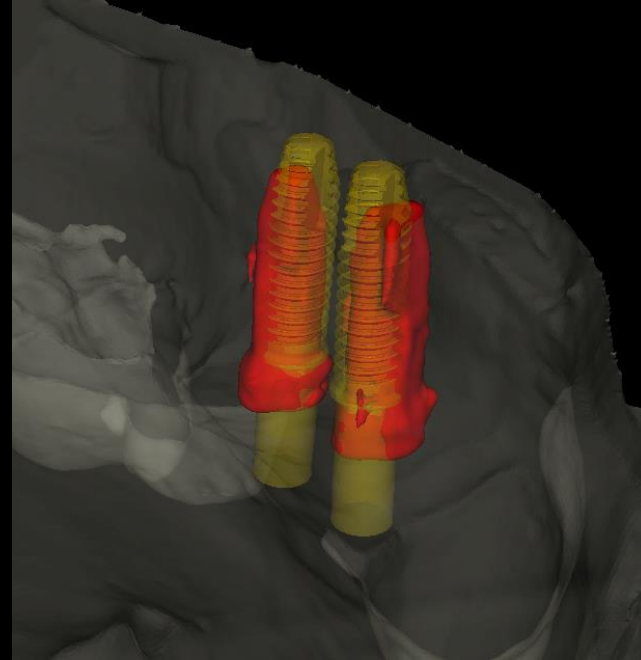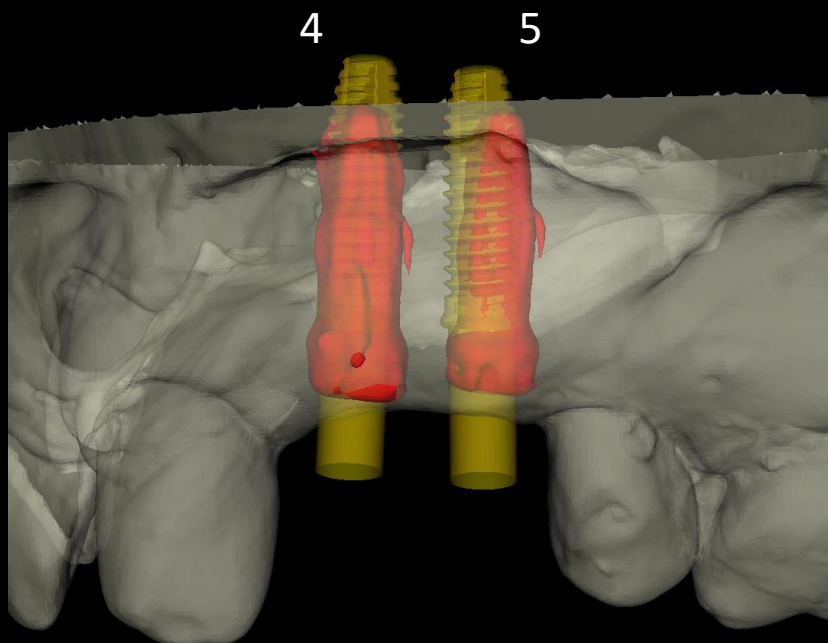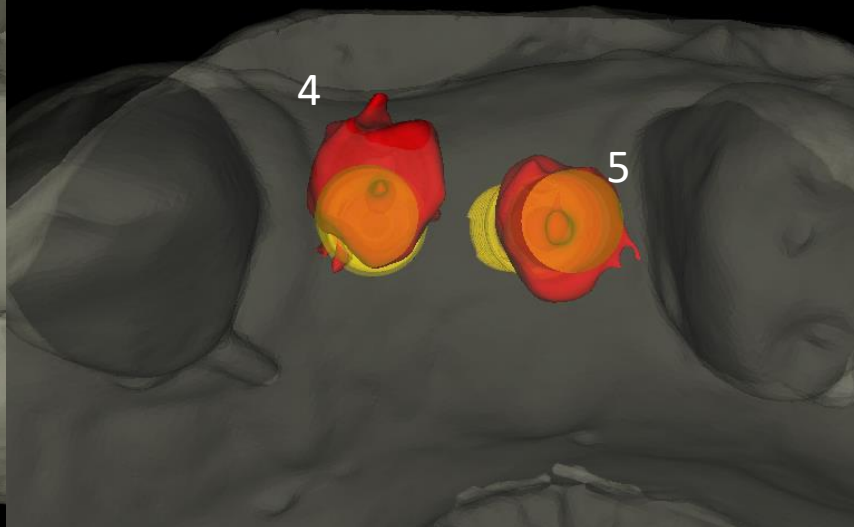

 Implants VSP

 Implants CT post

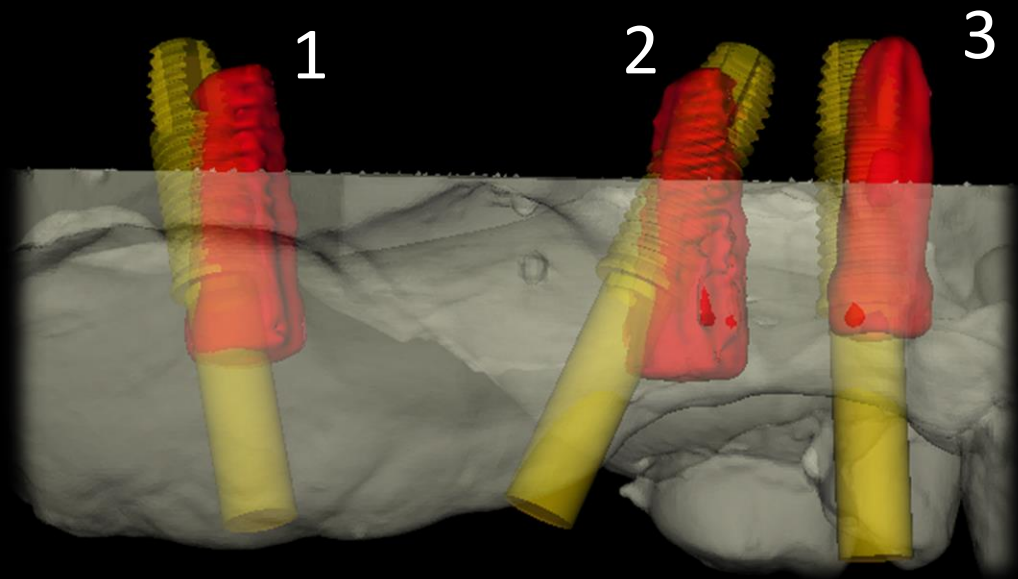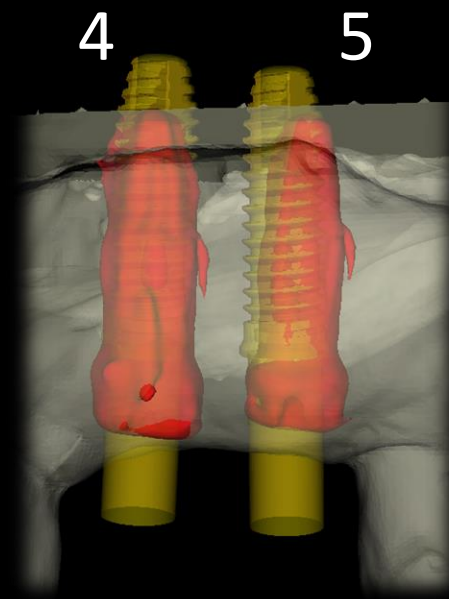



ION007 - SUP

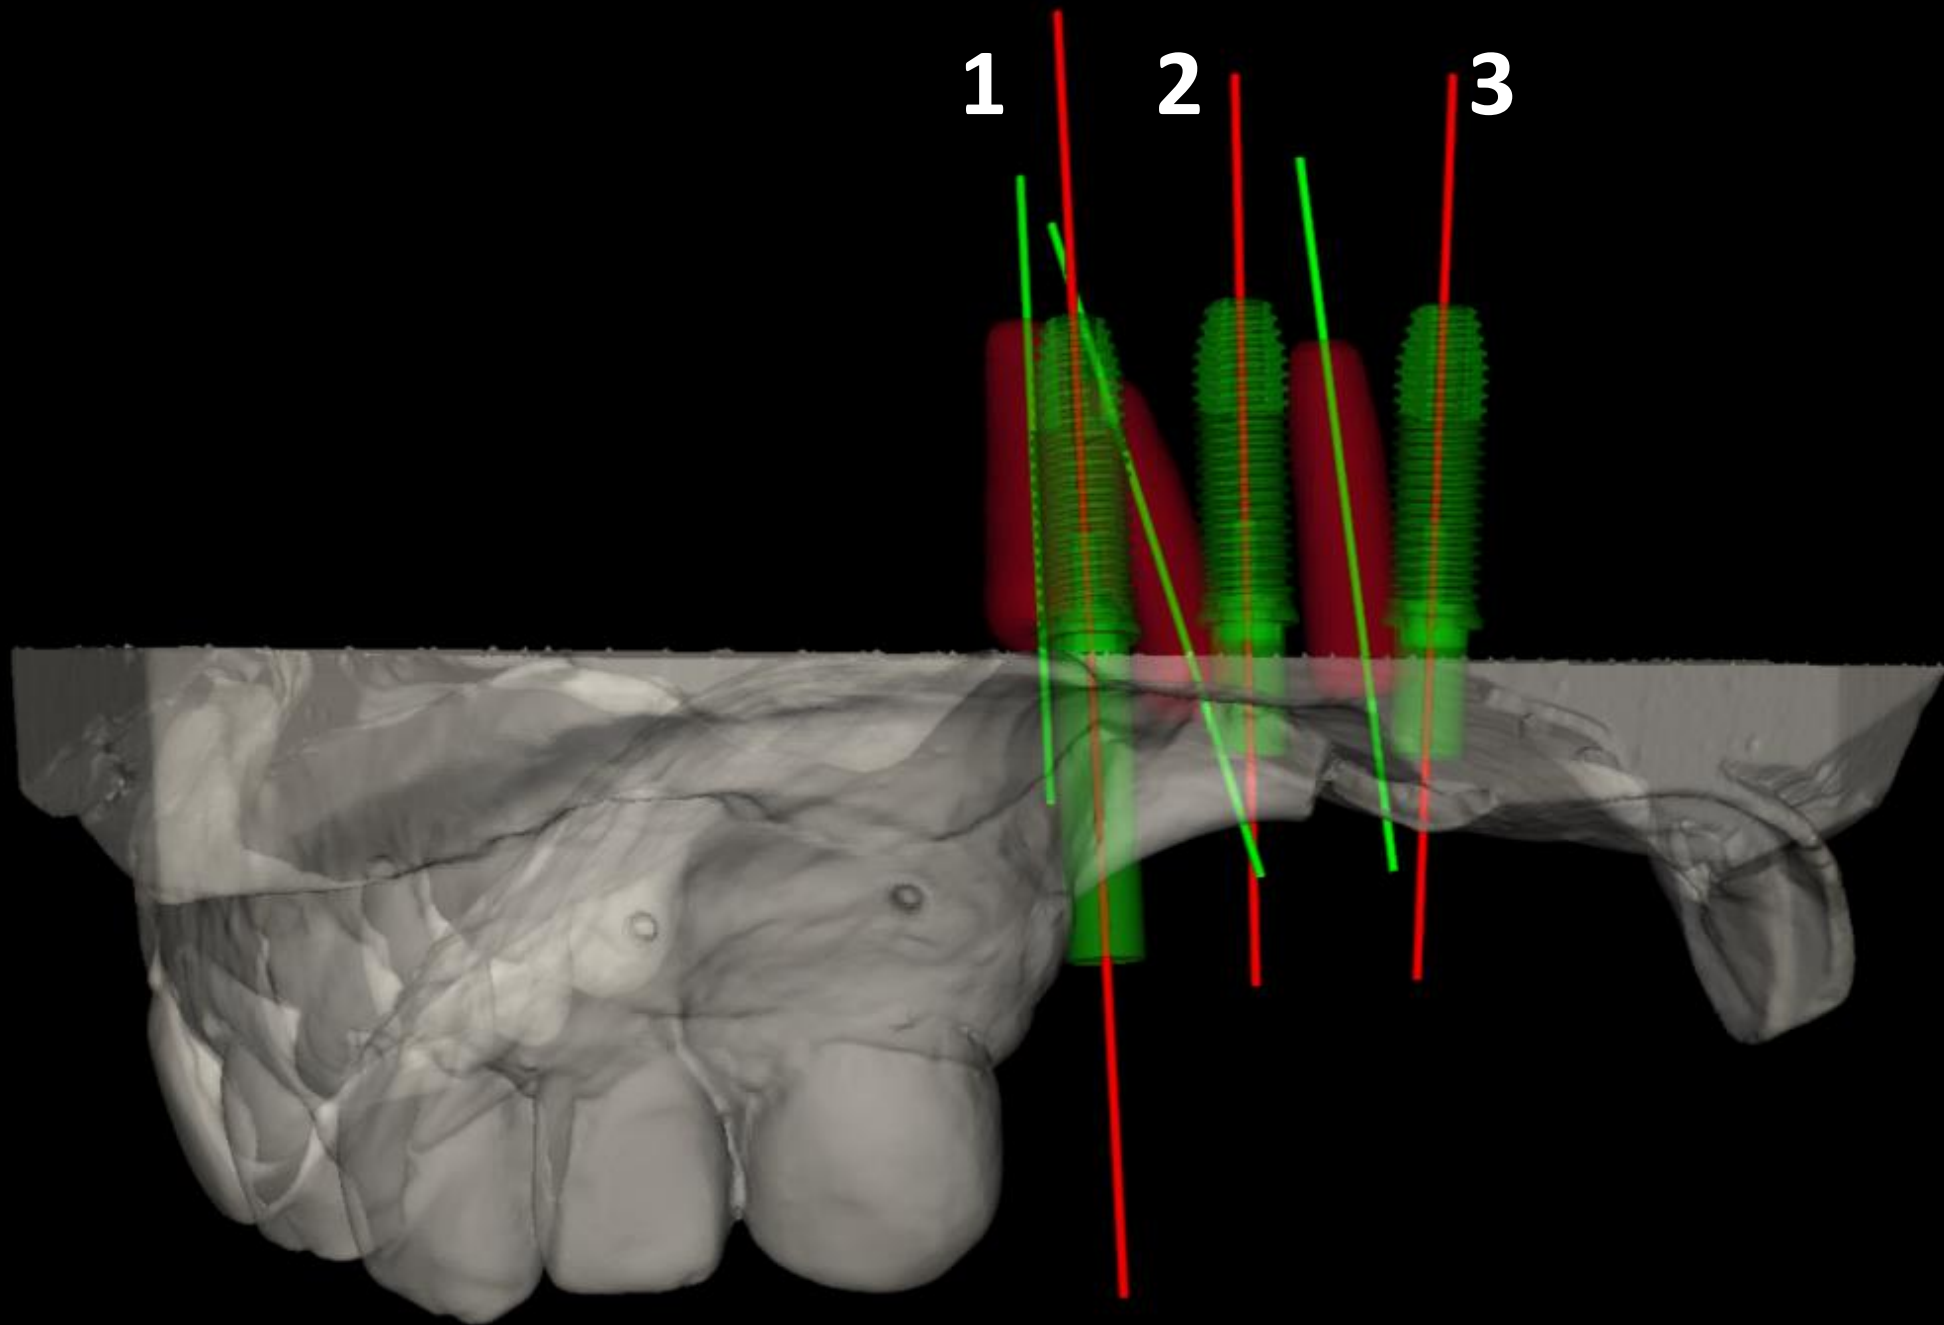

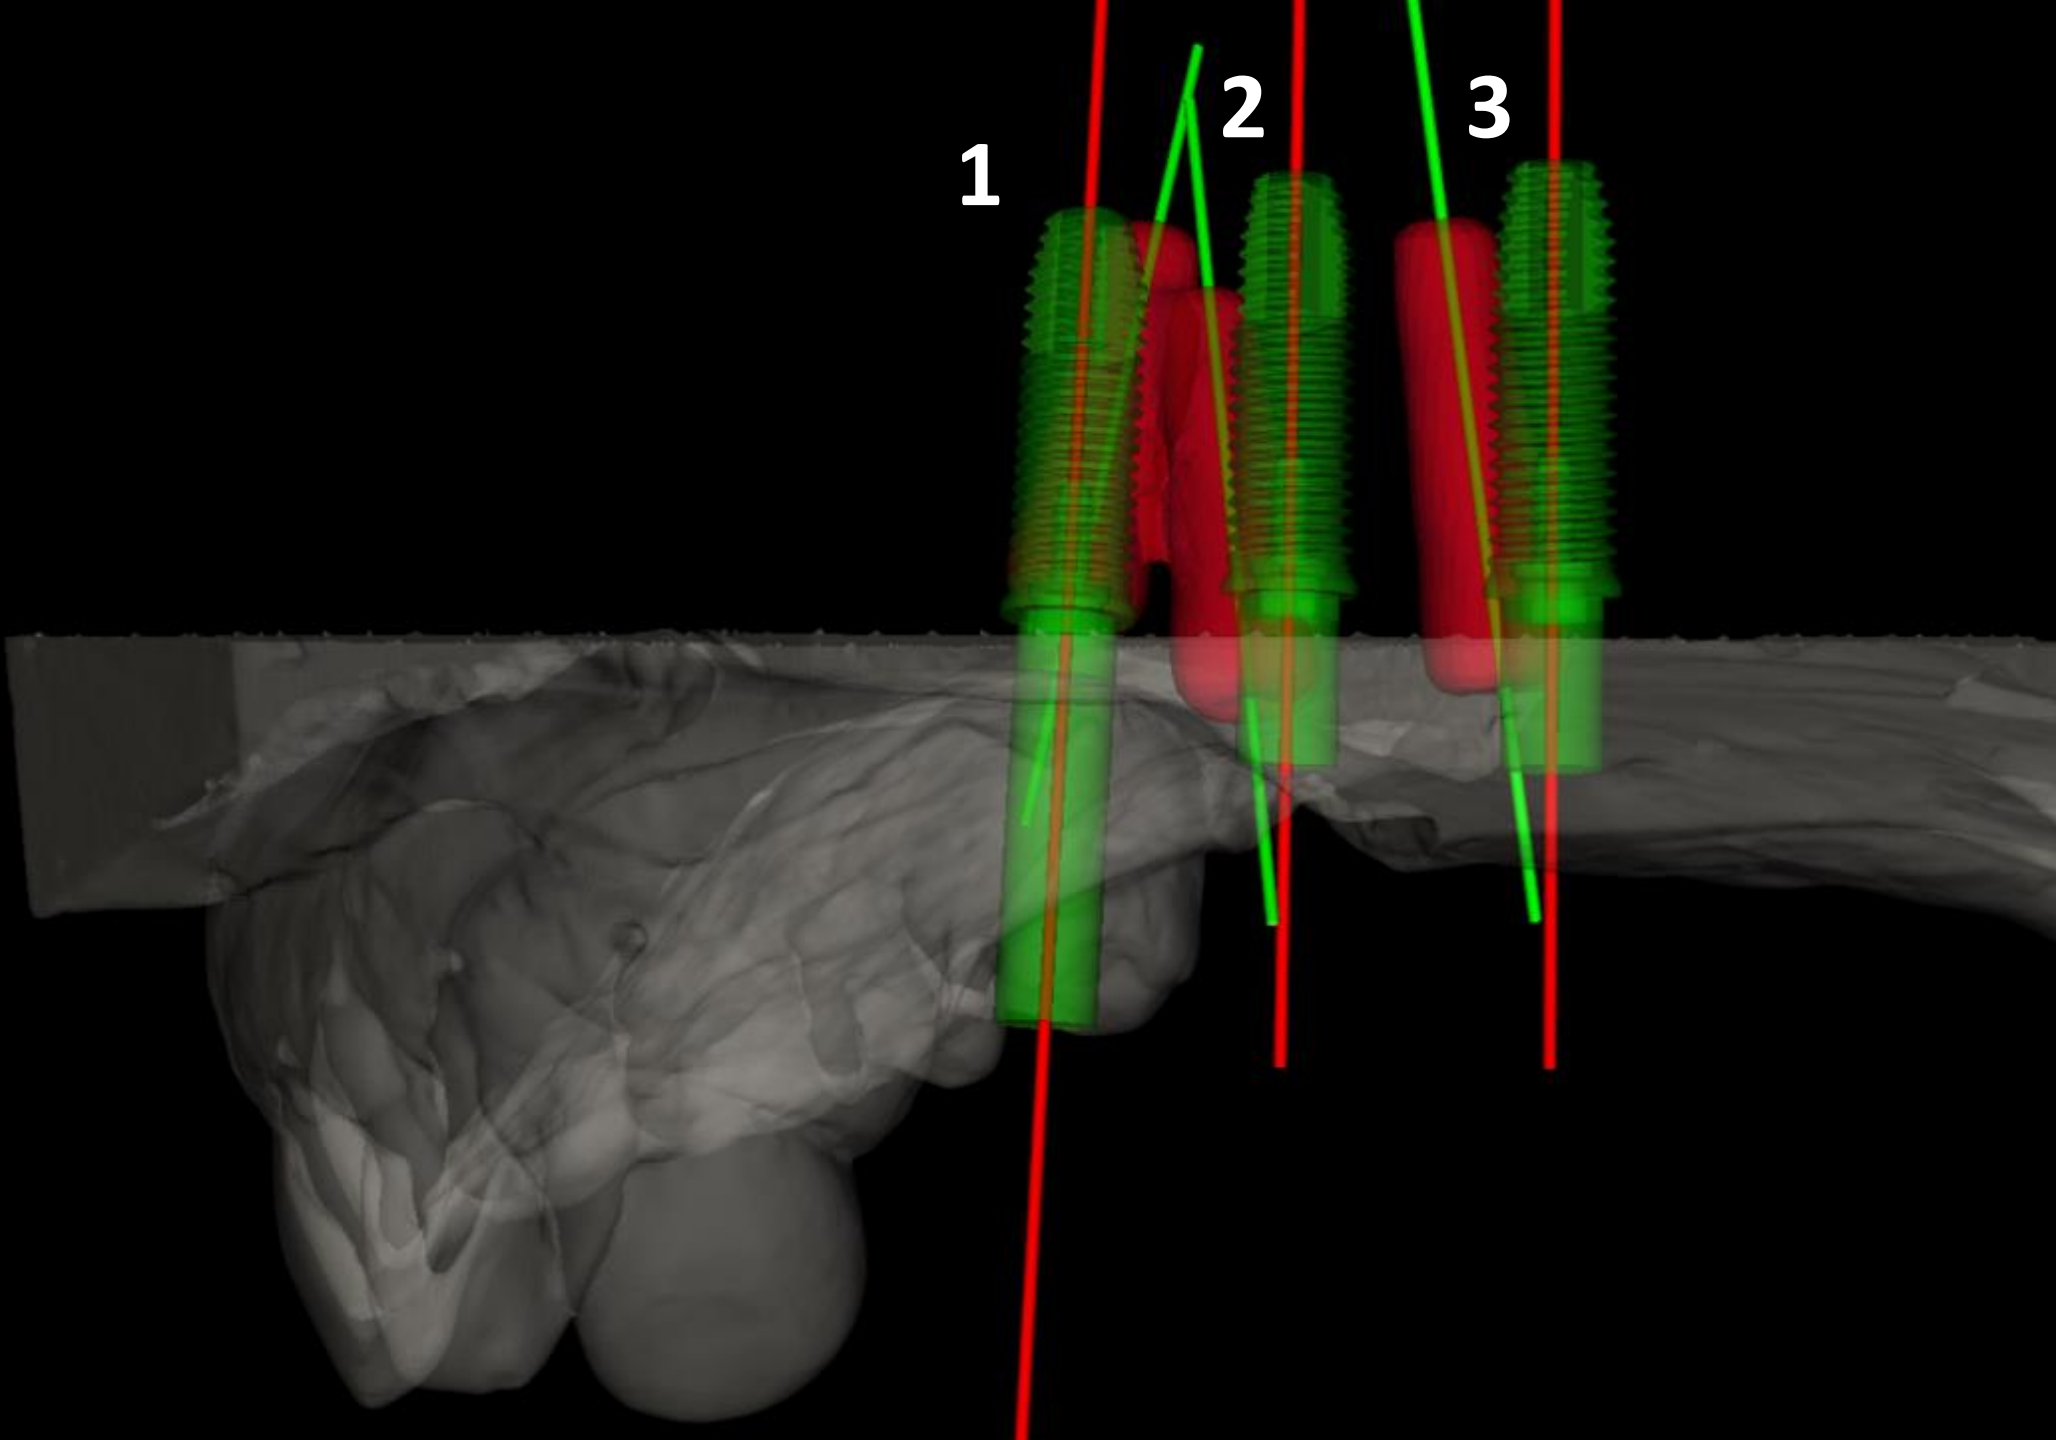

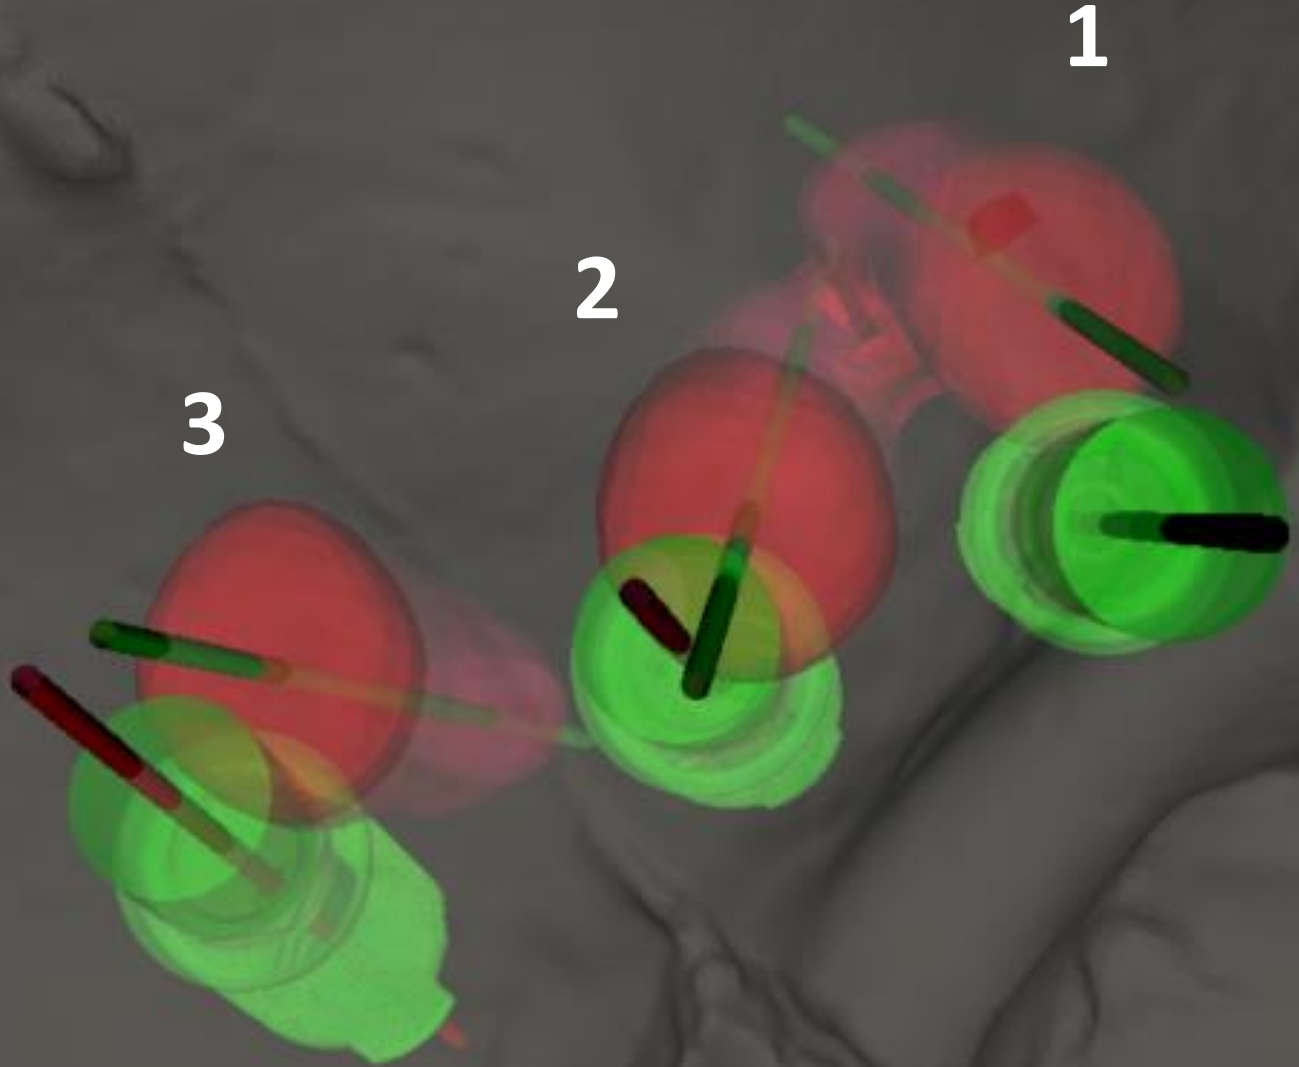

ION008 - INF

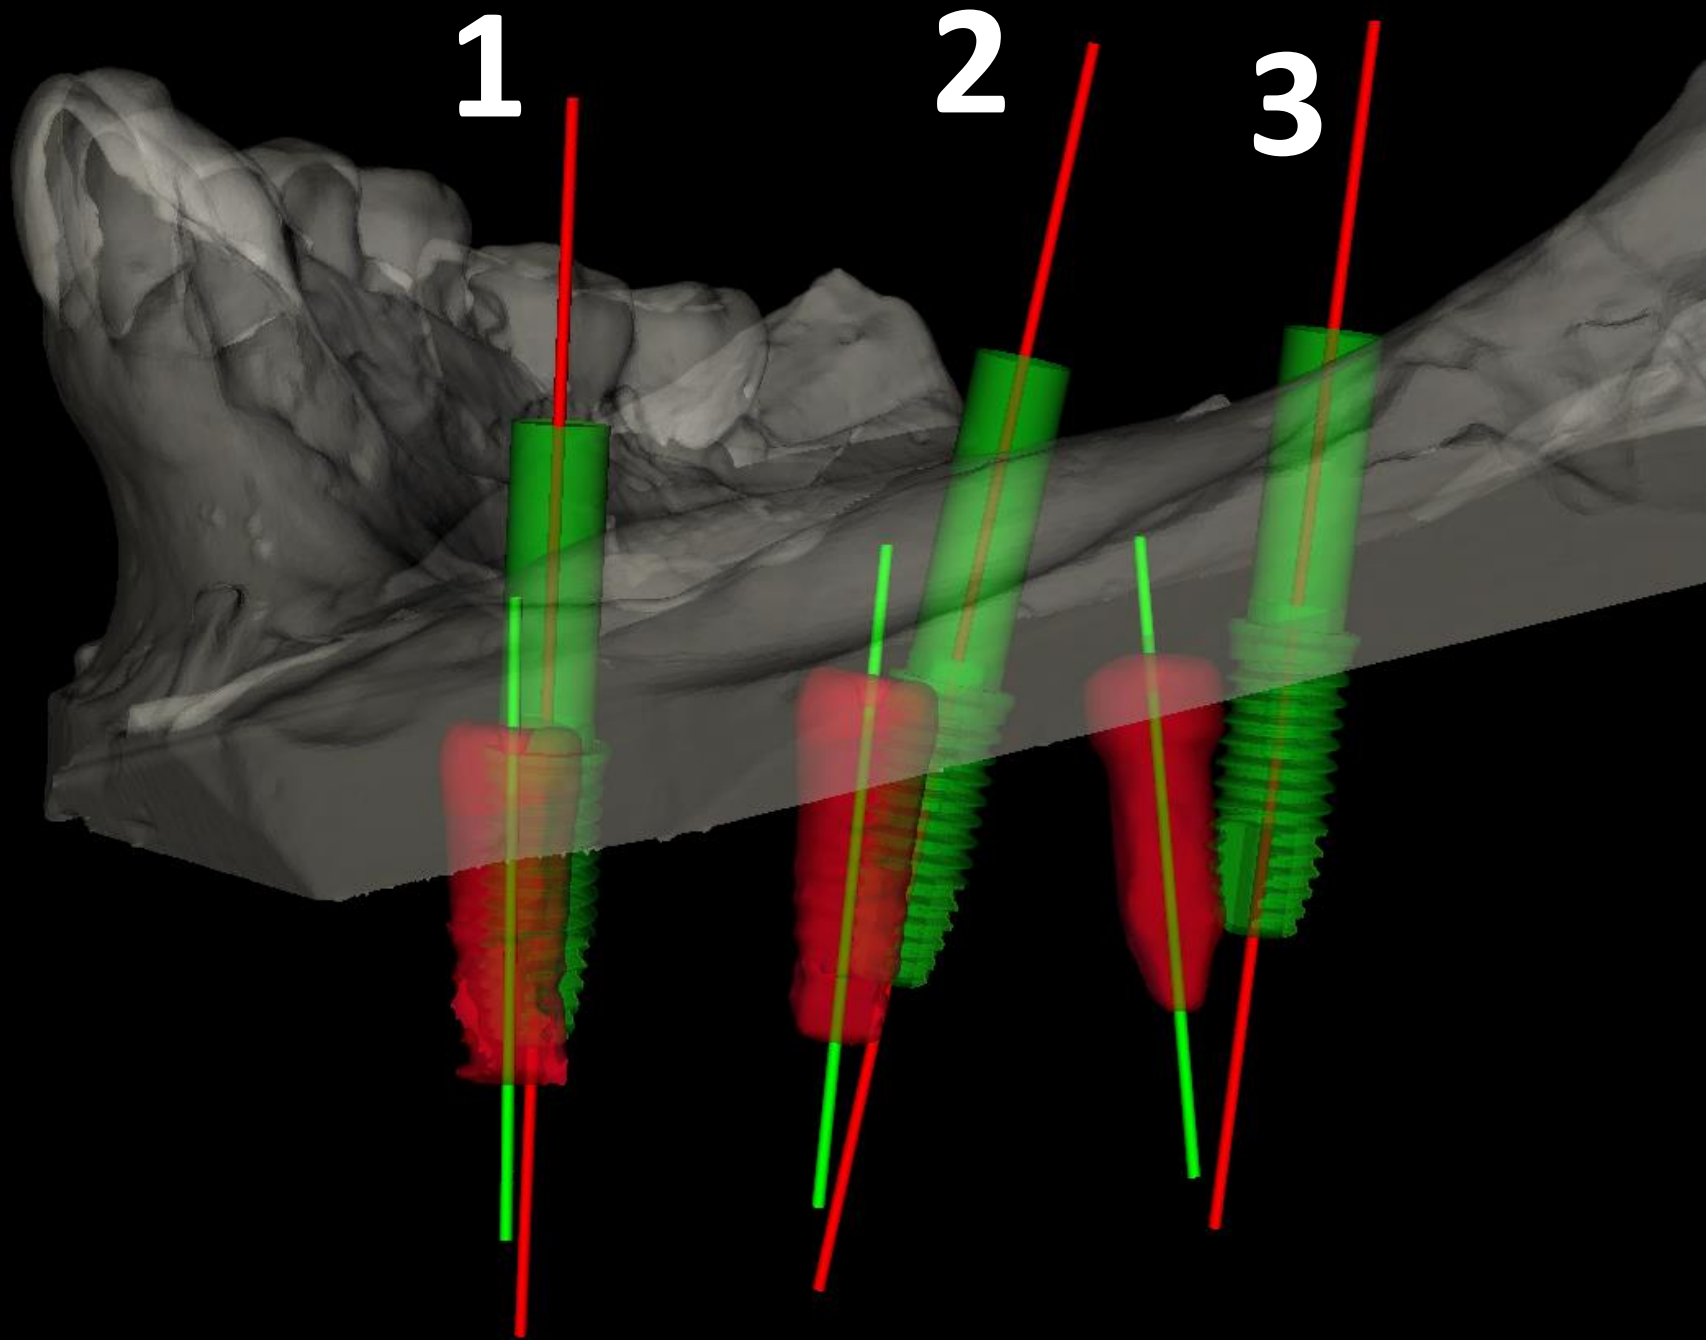

1

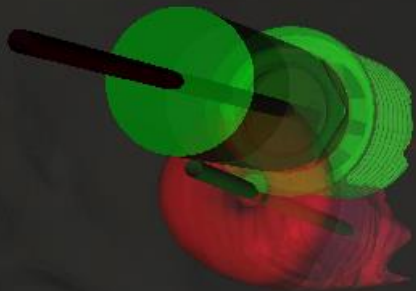

2

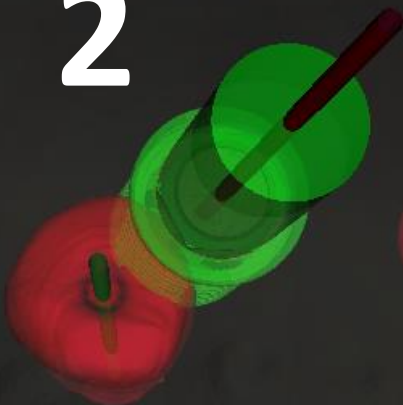

3

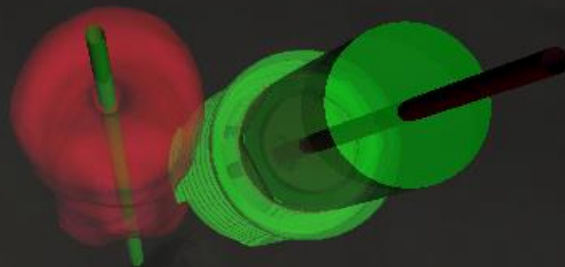

ION009 - INF



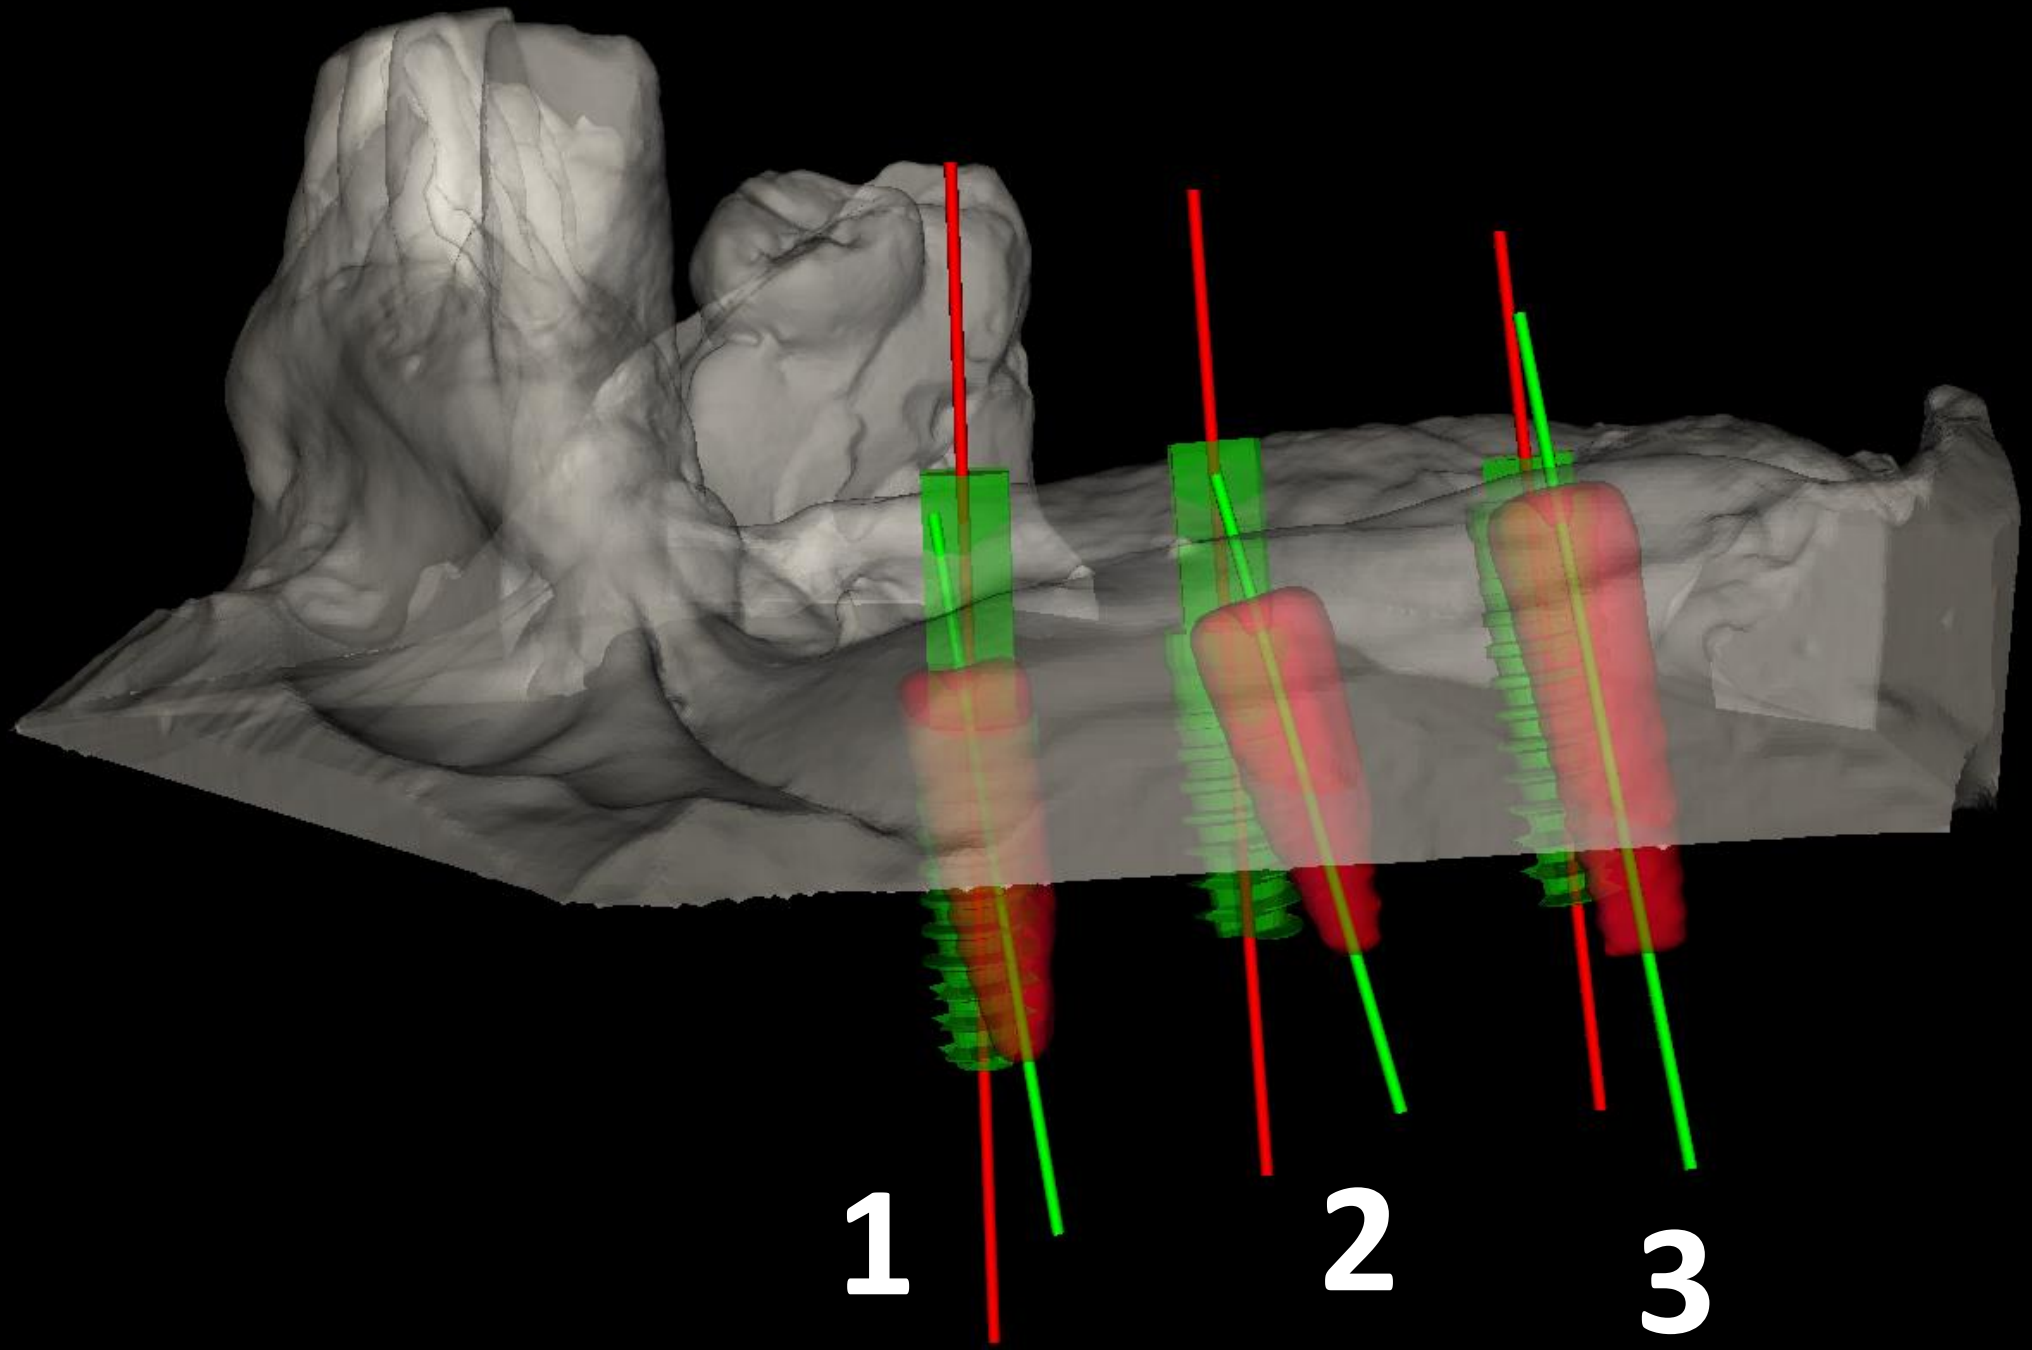

1

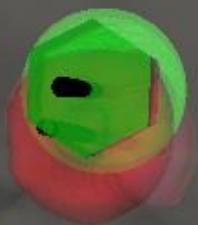

2

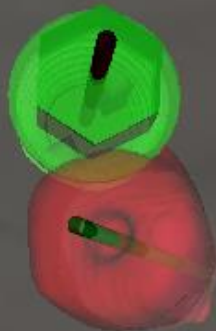

3

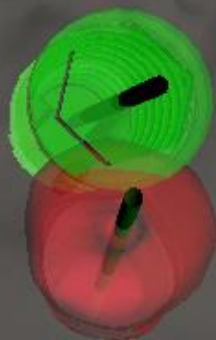

ION009 – SUP

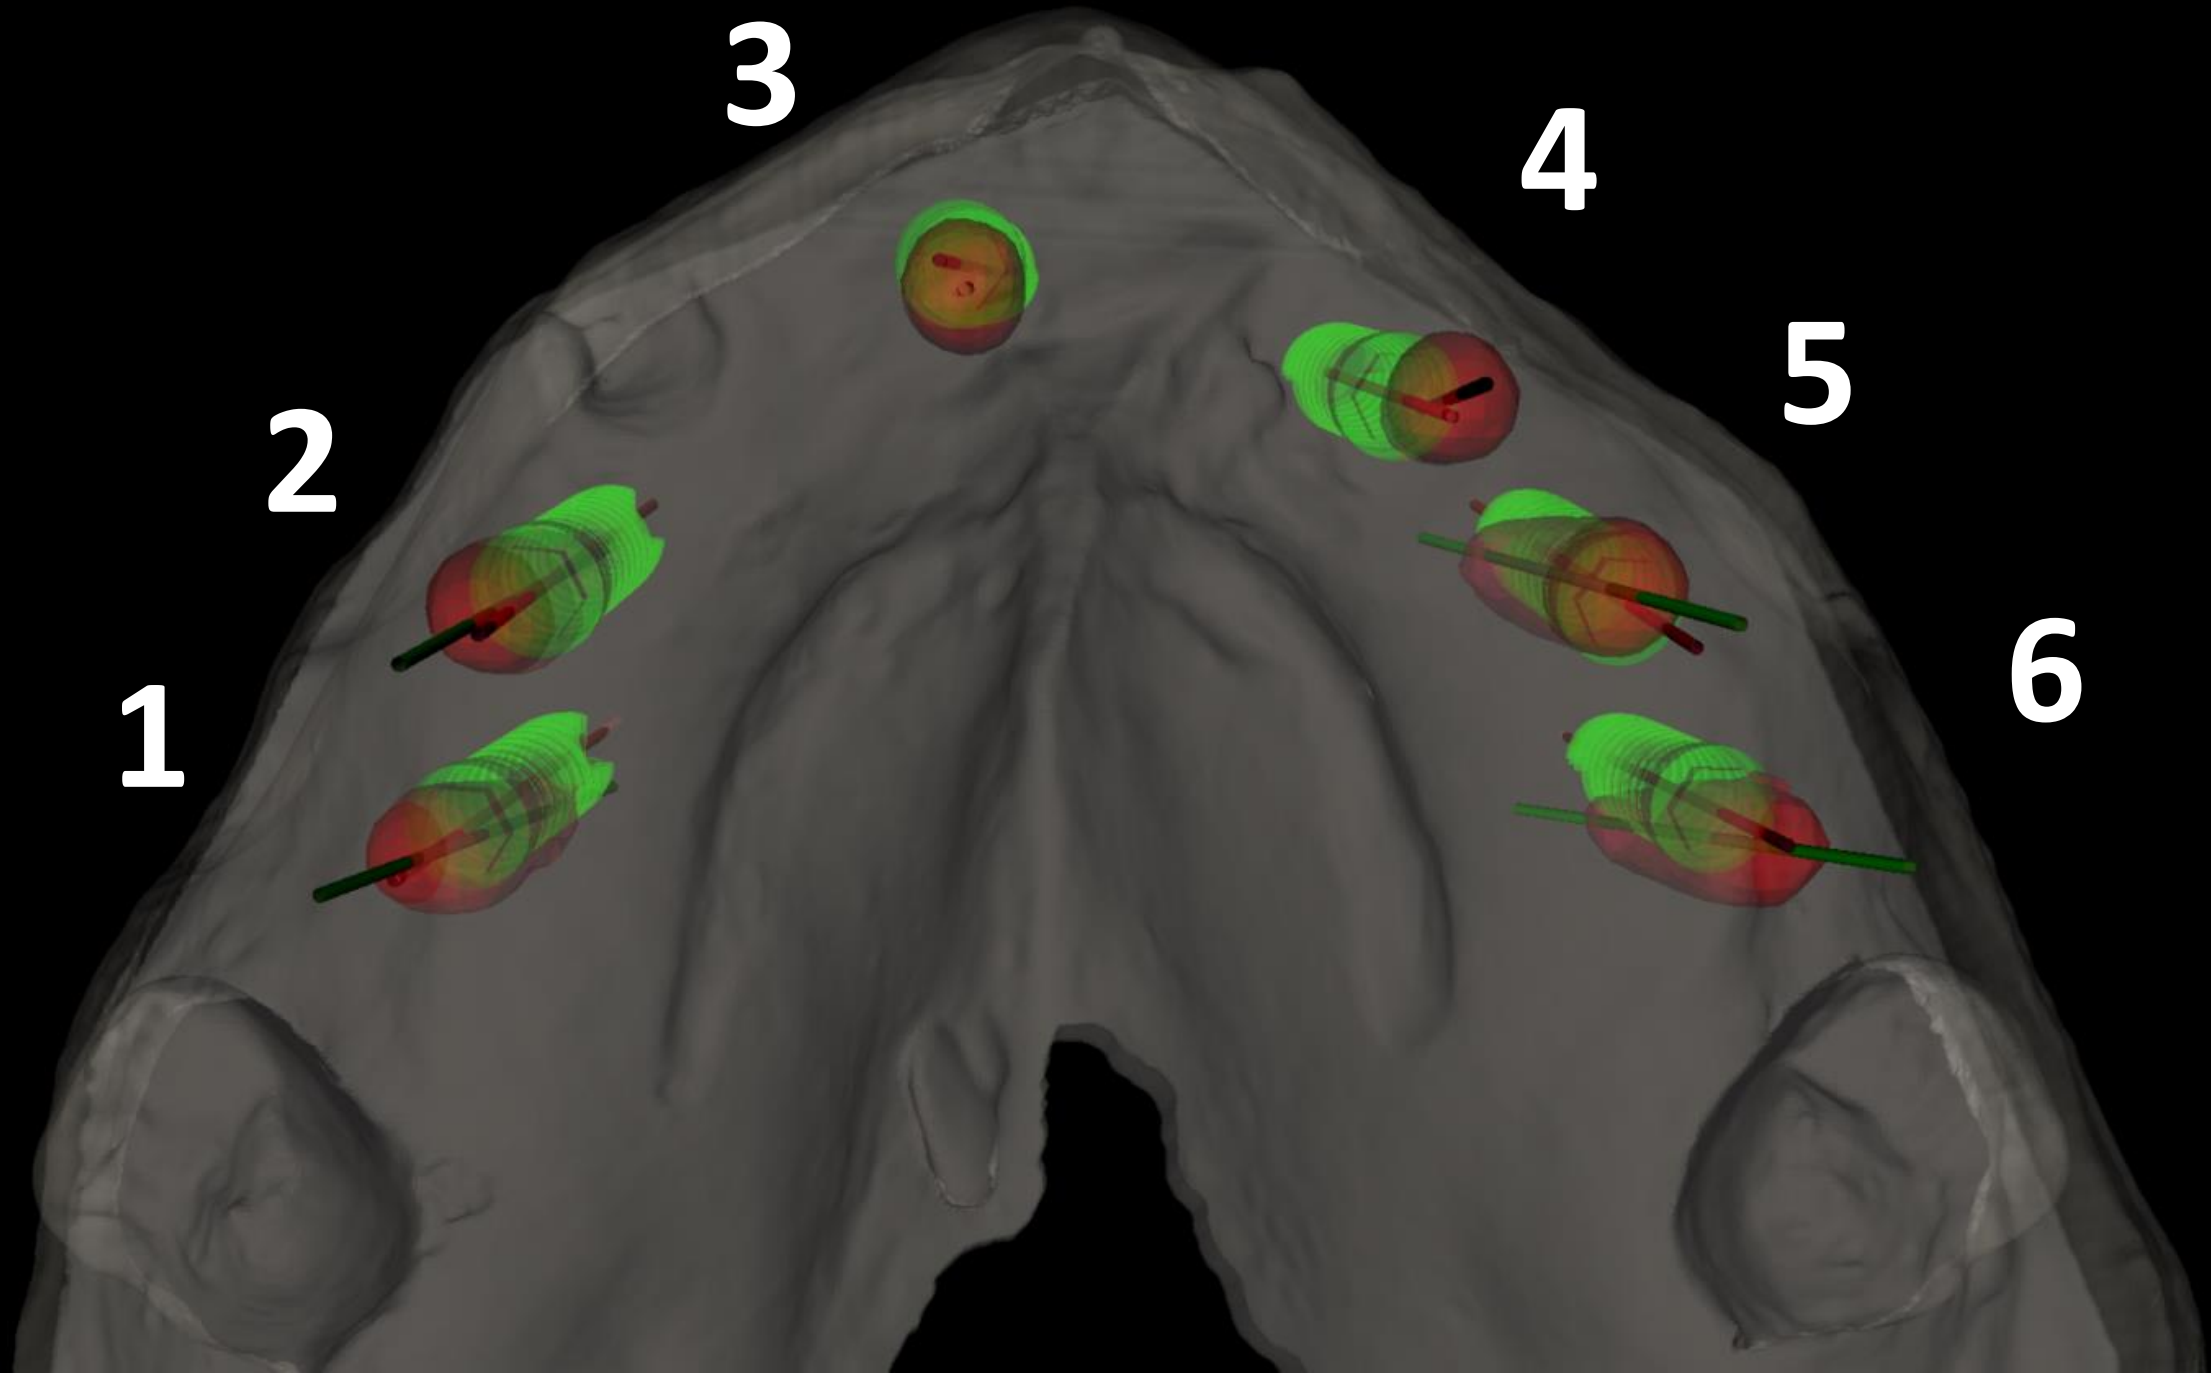

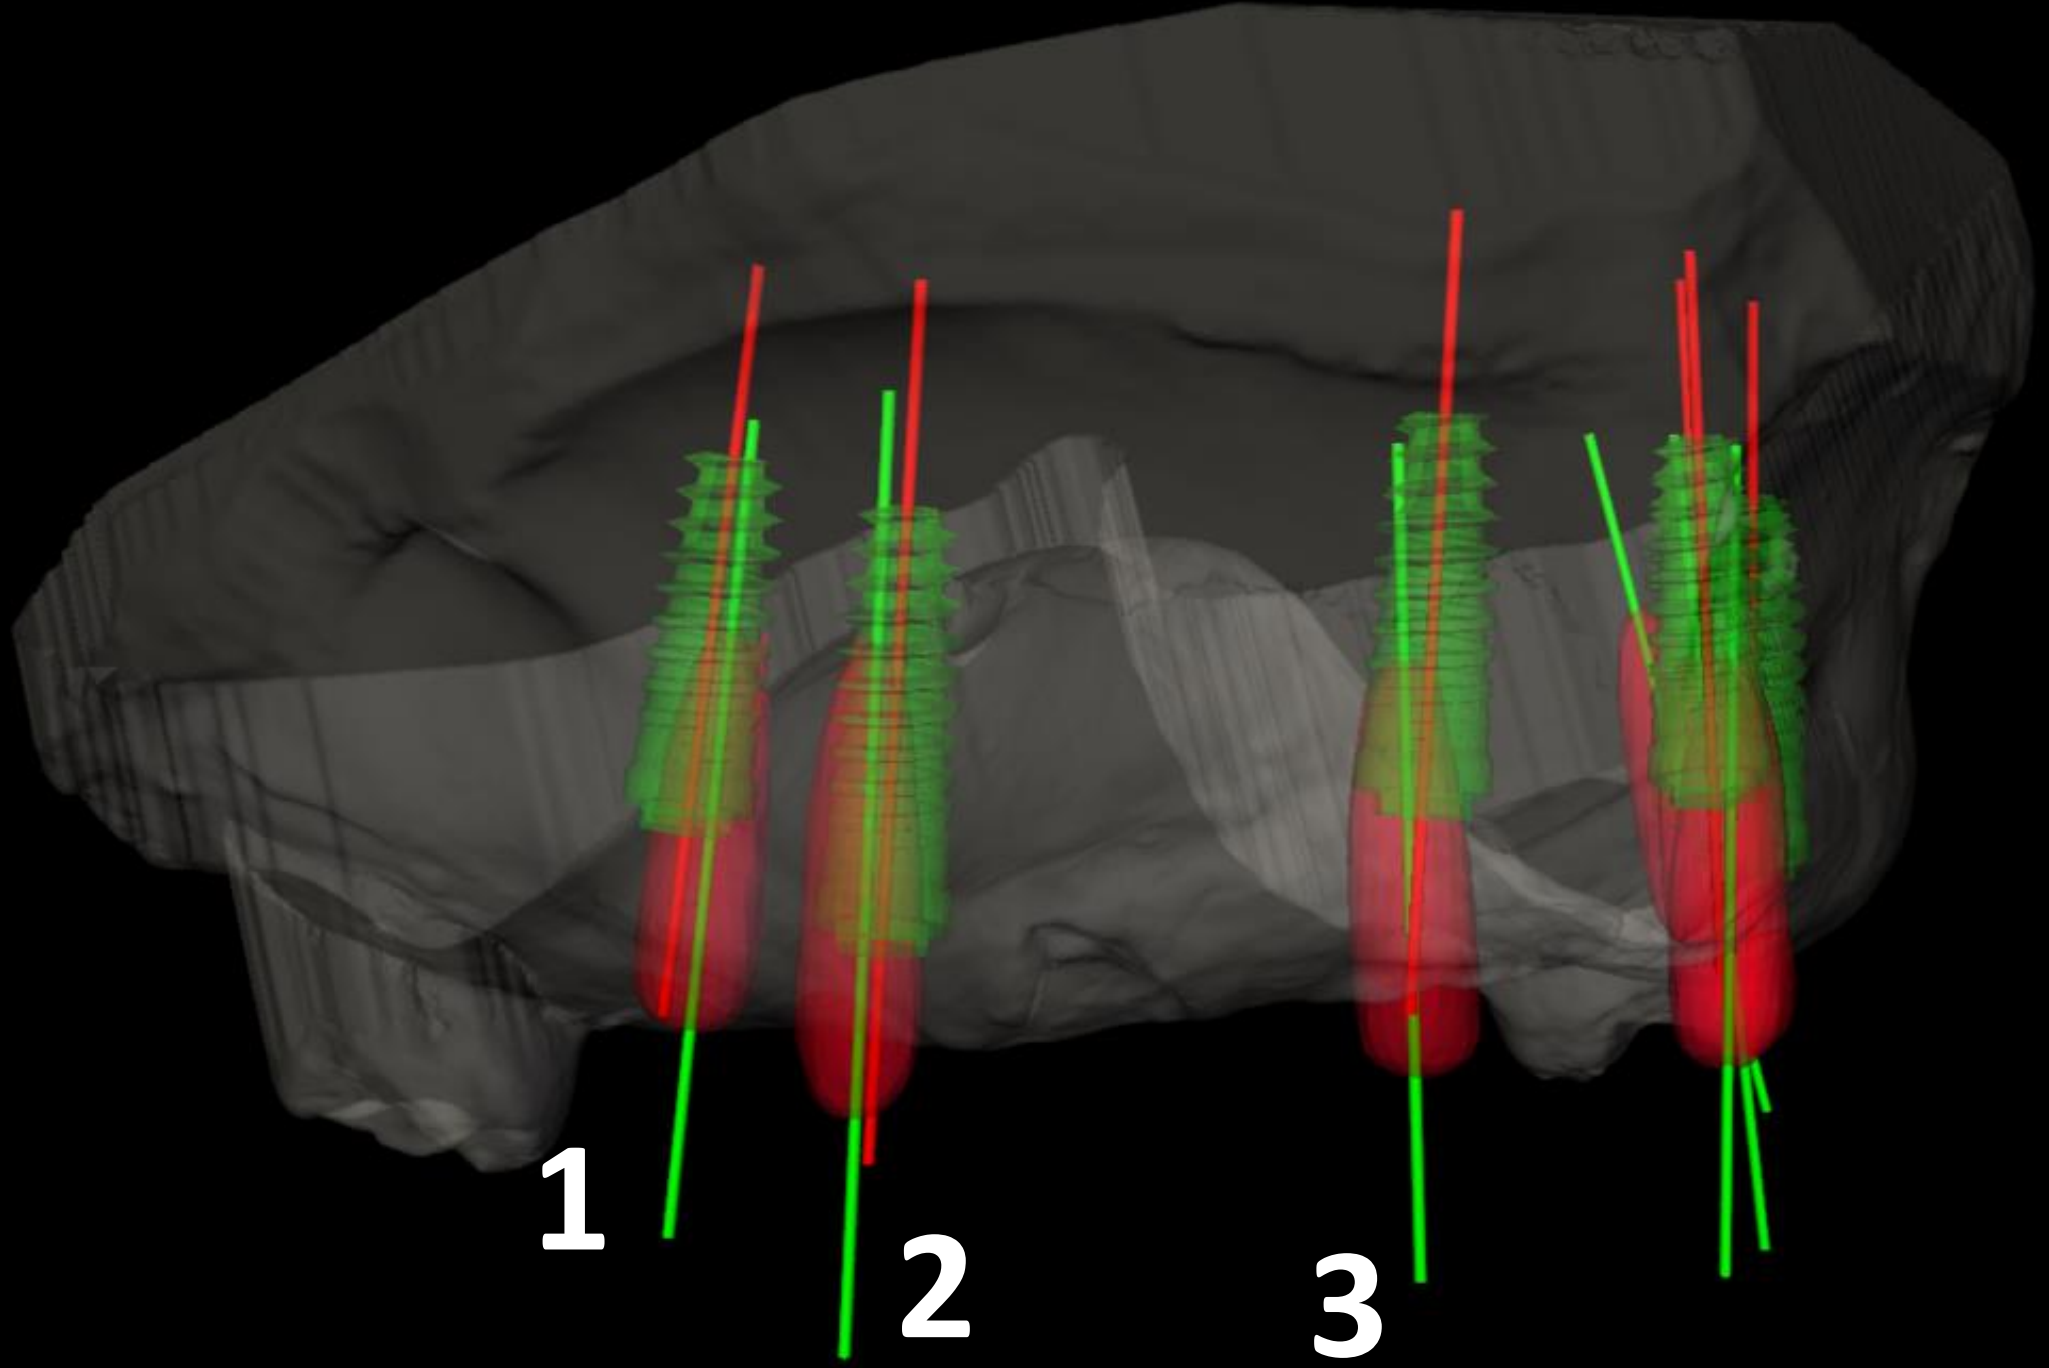

1

2

3

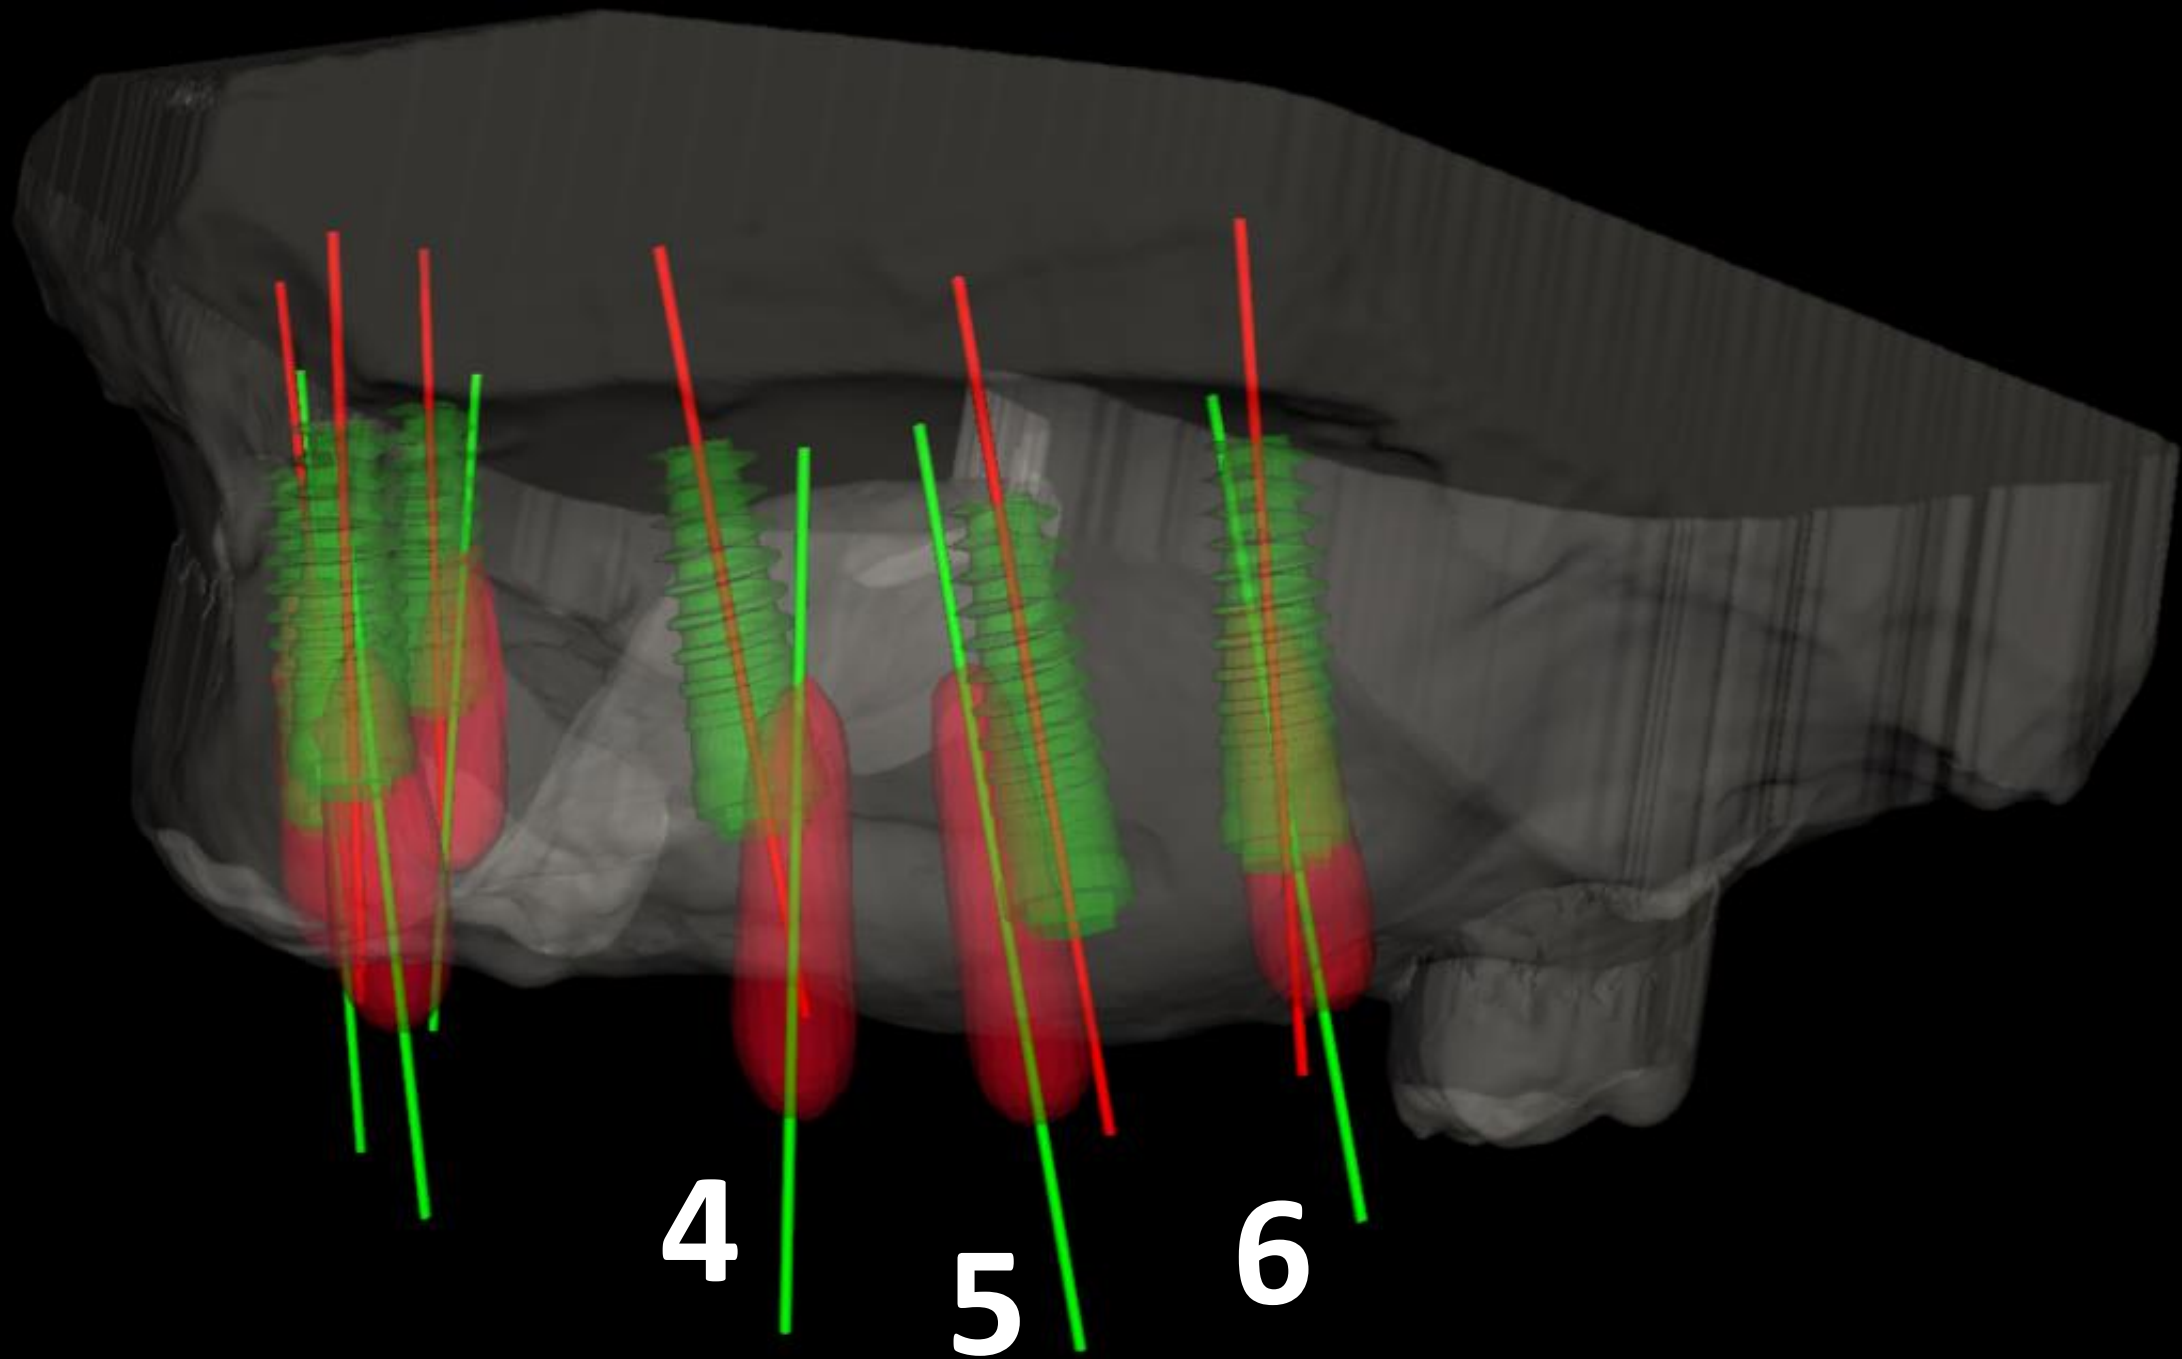

ION0010 - INF

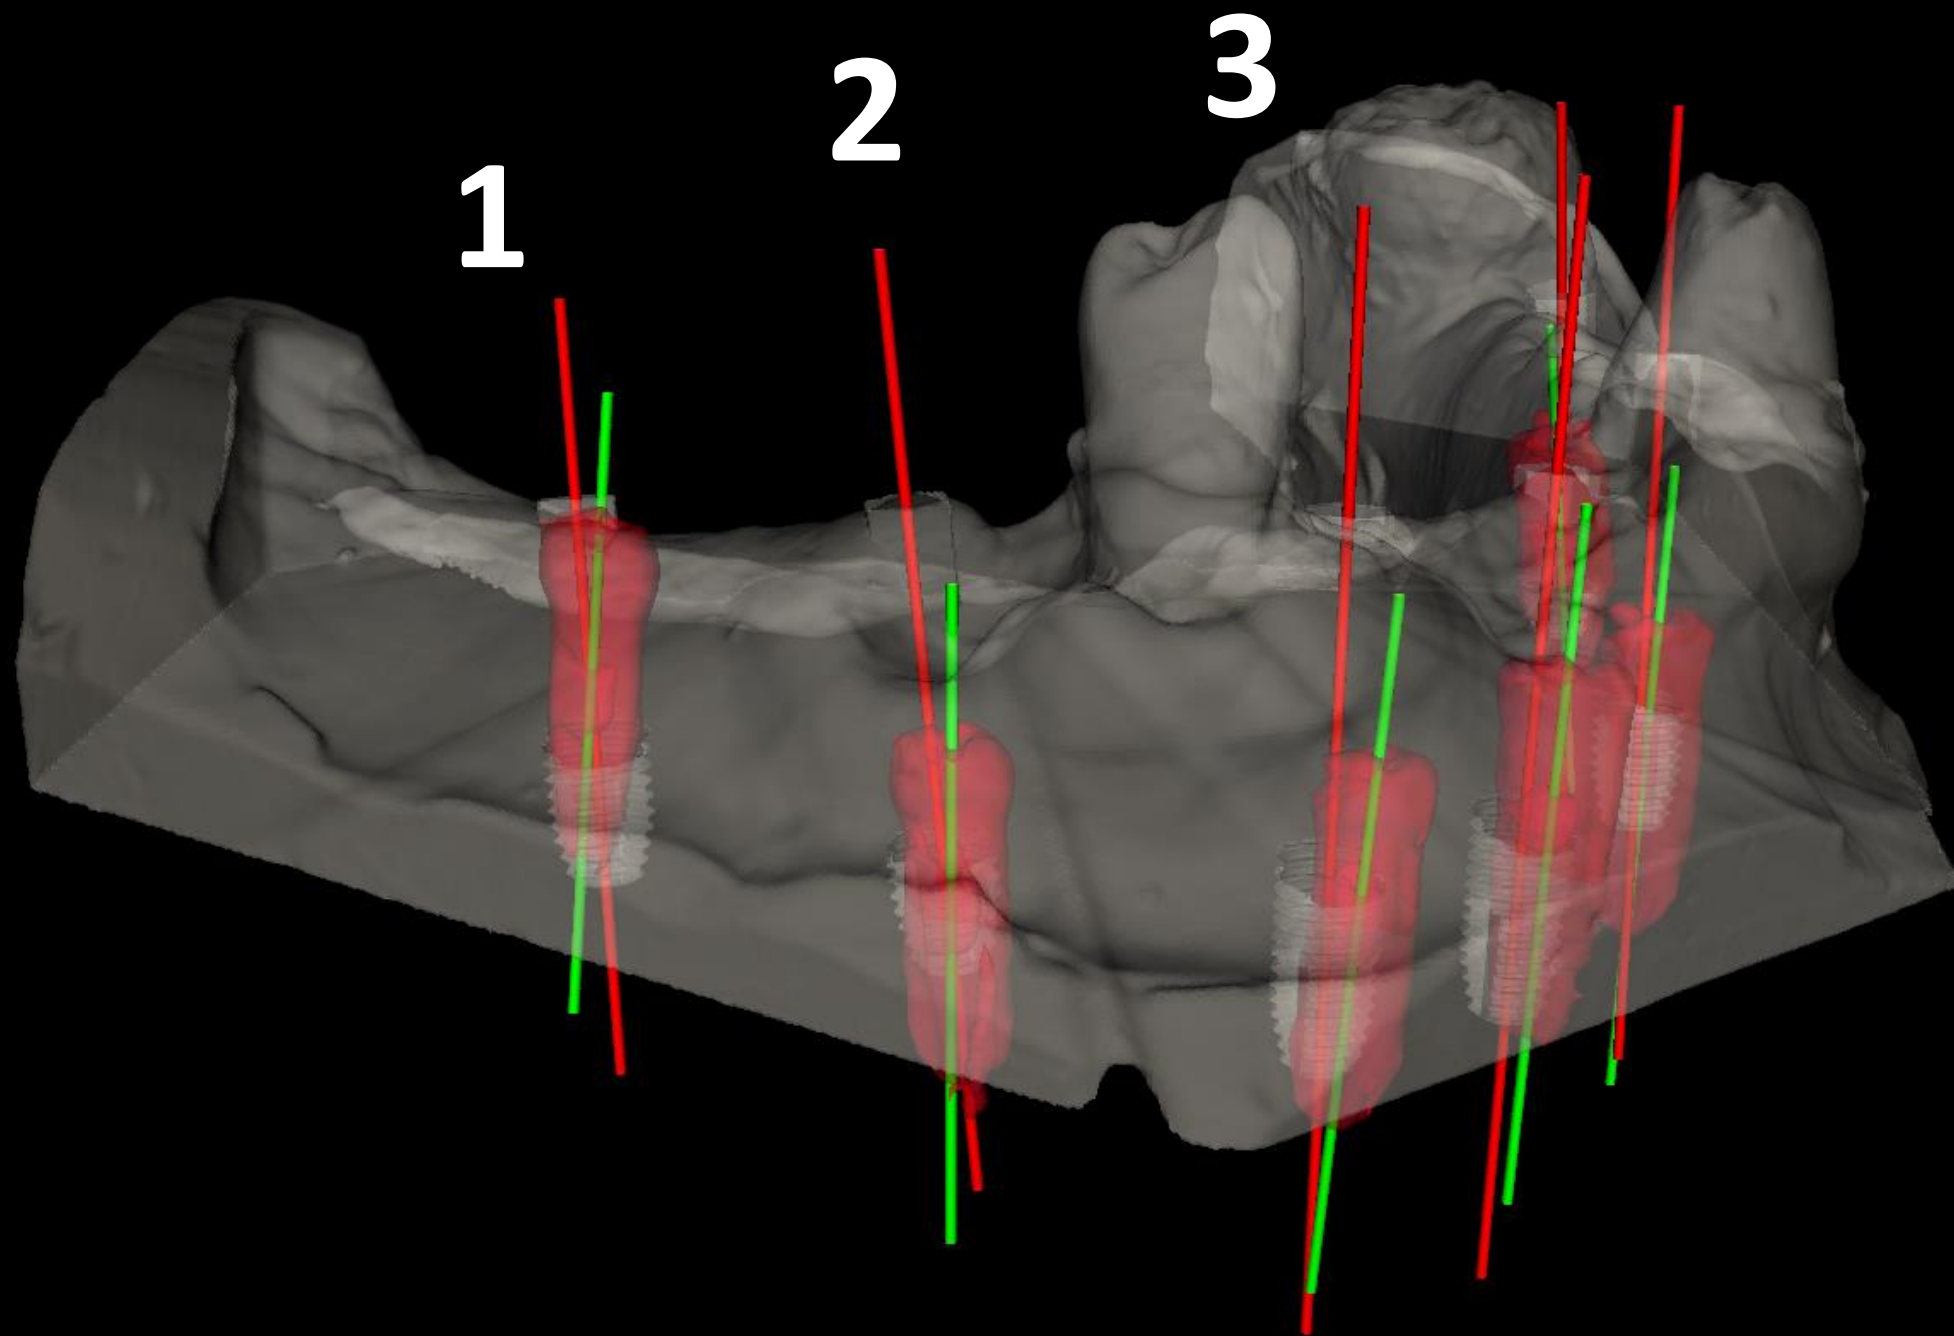



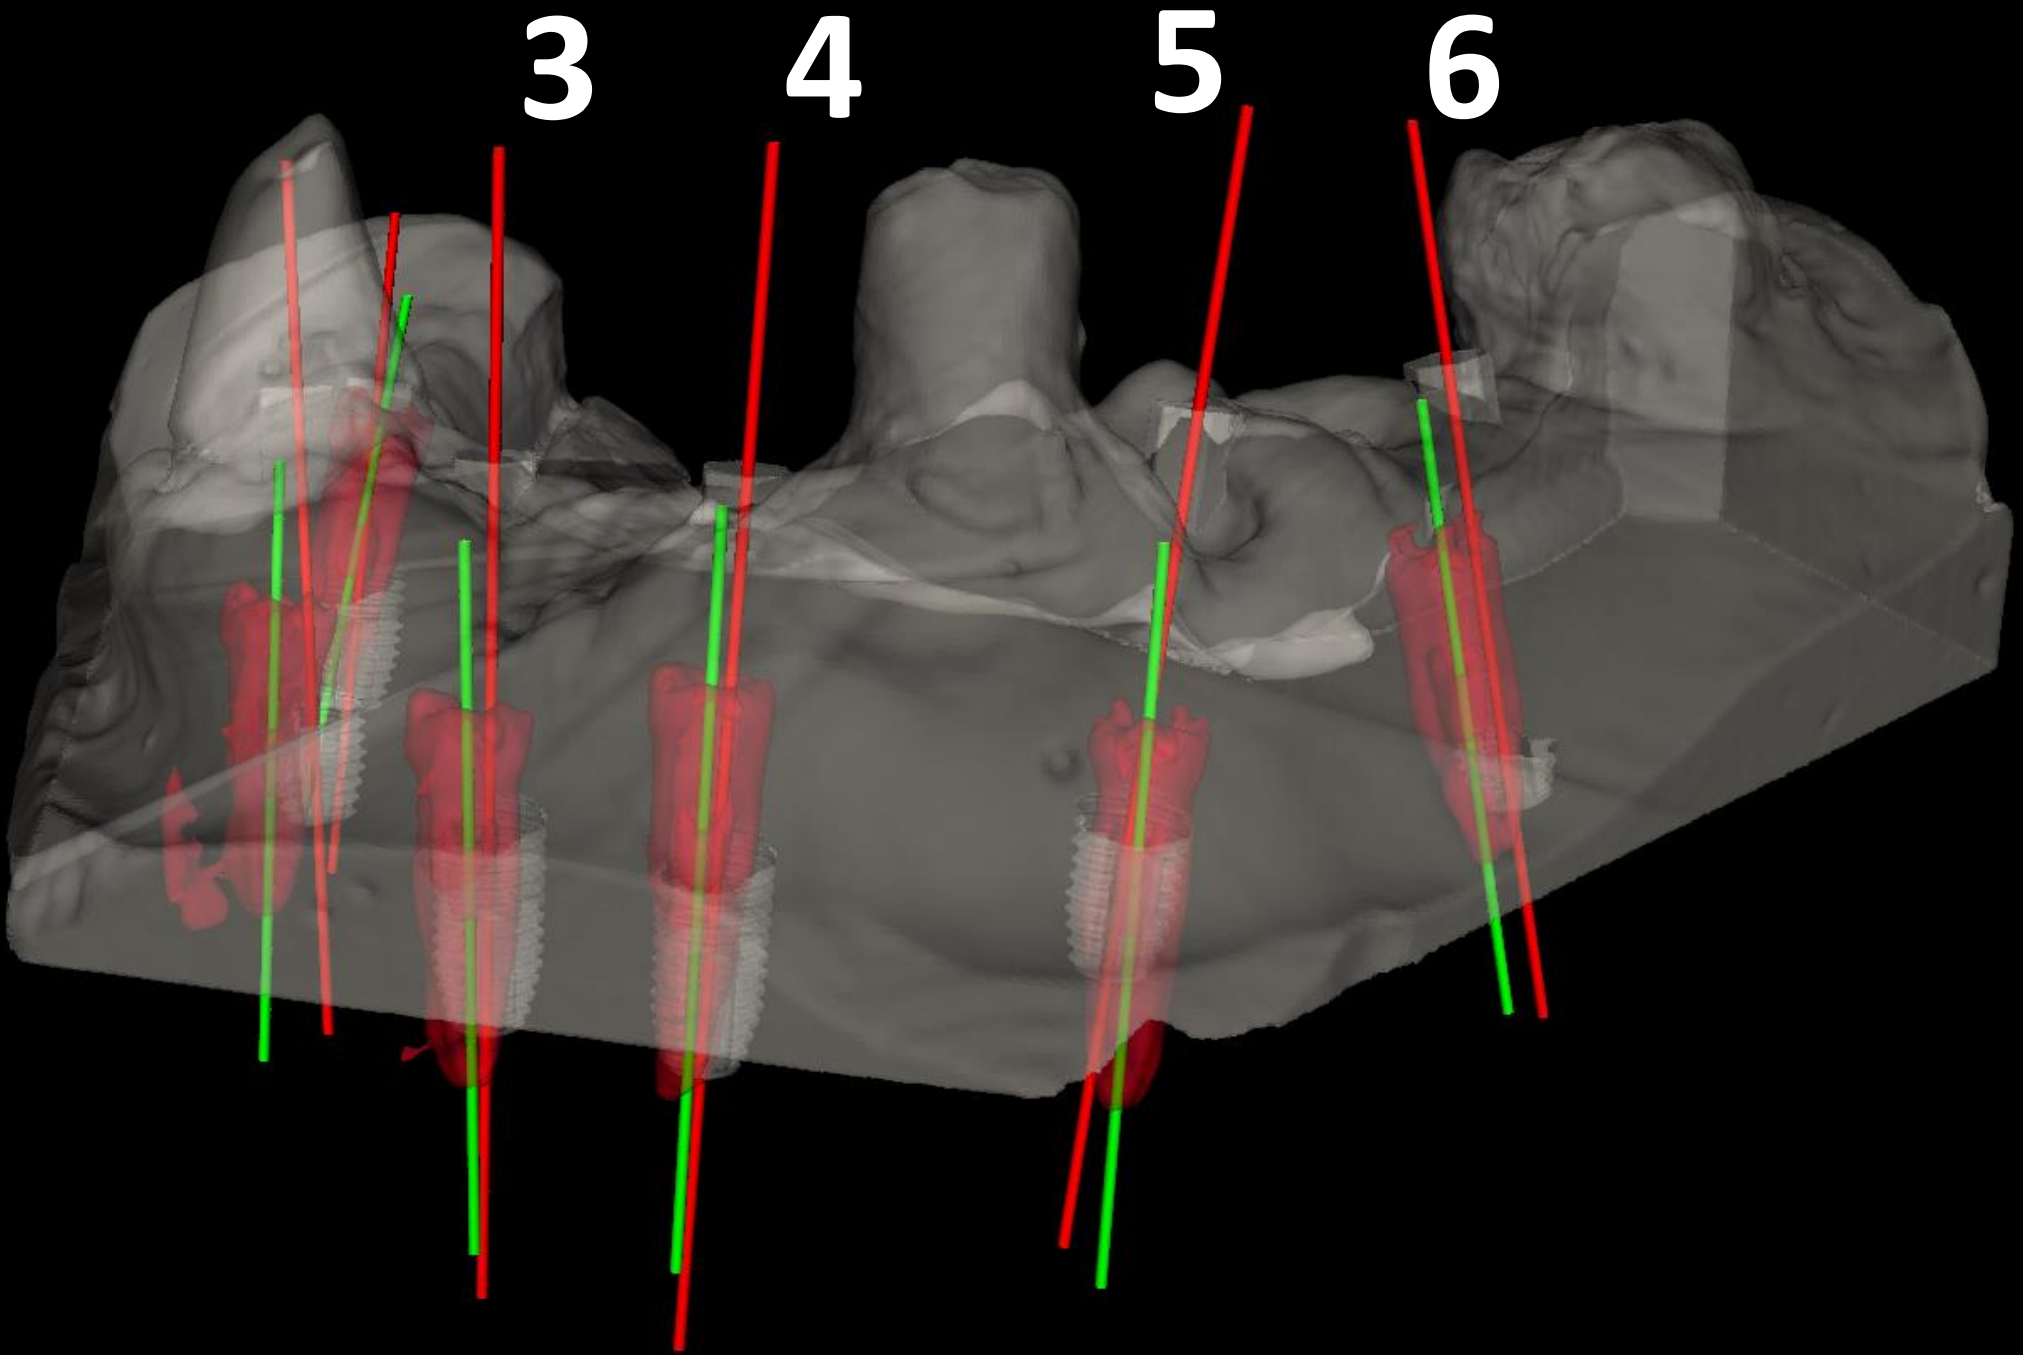

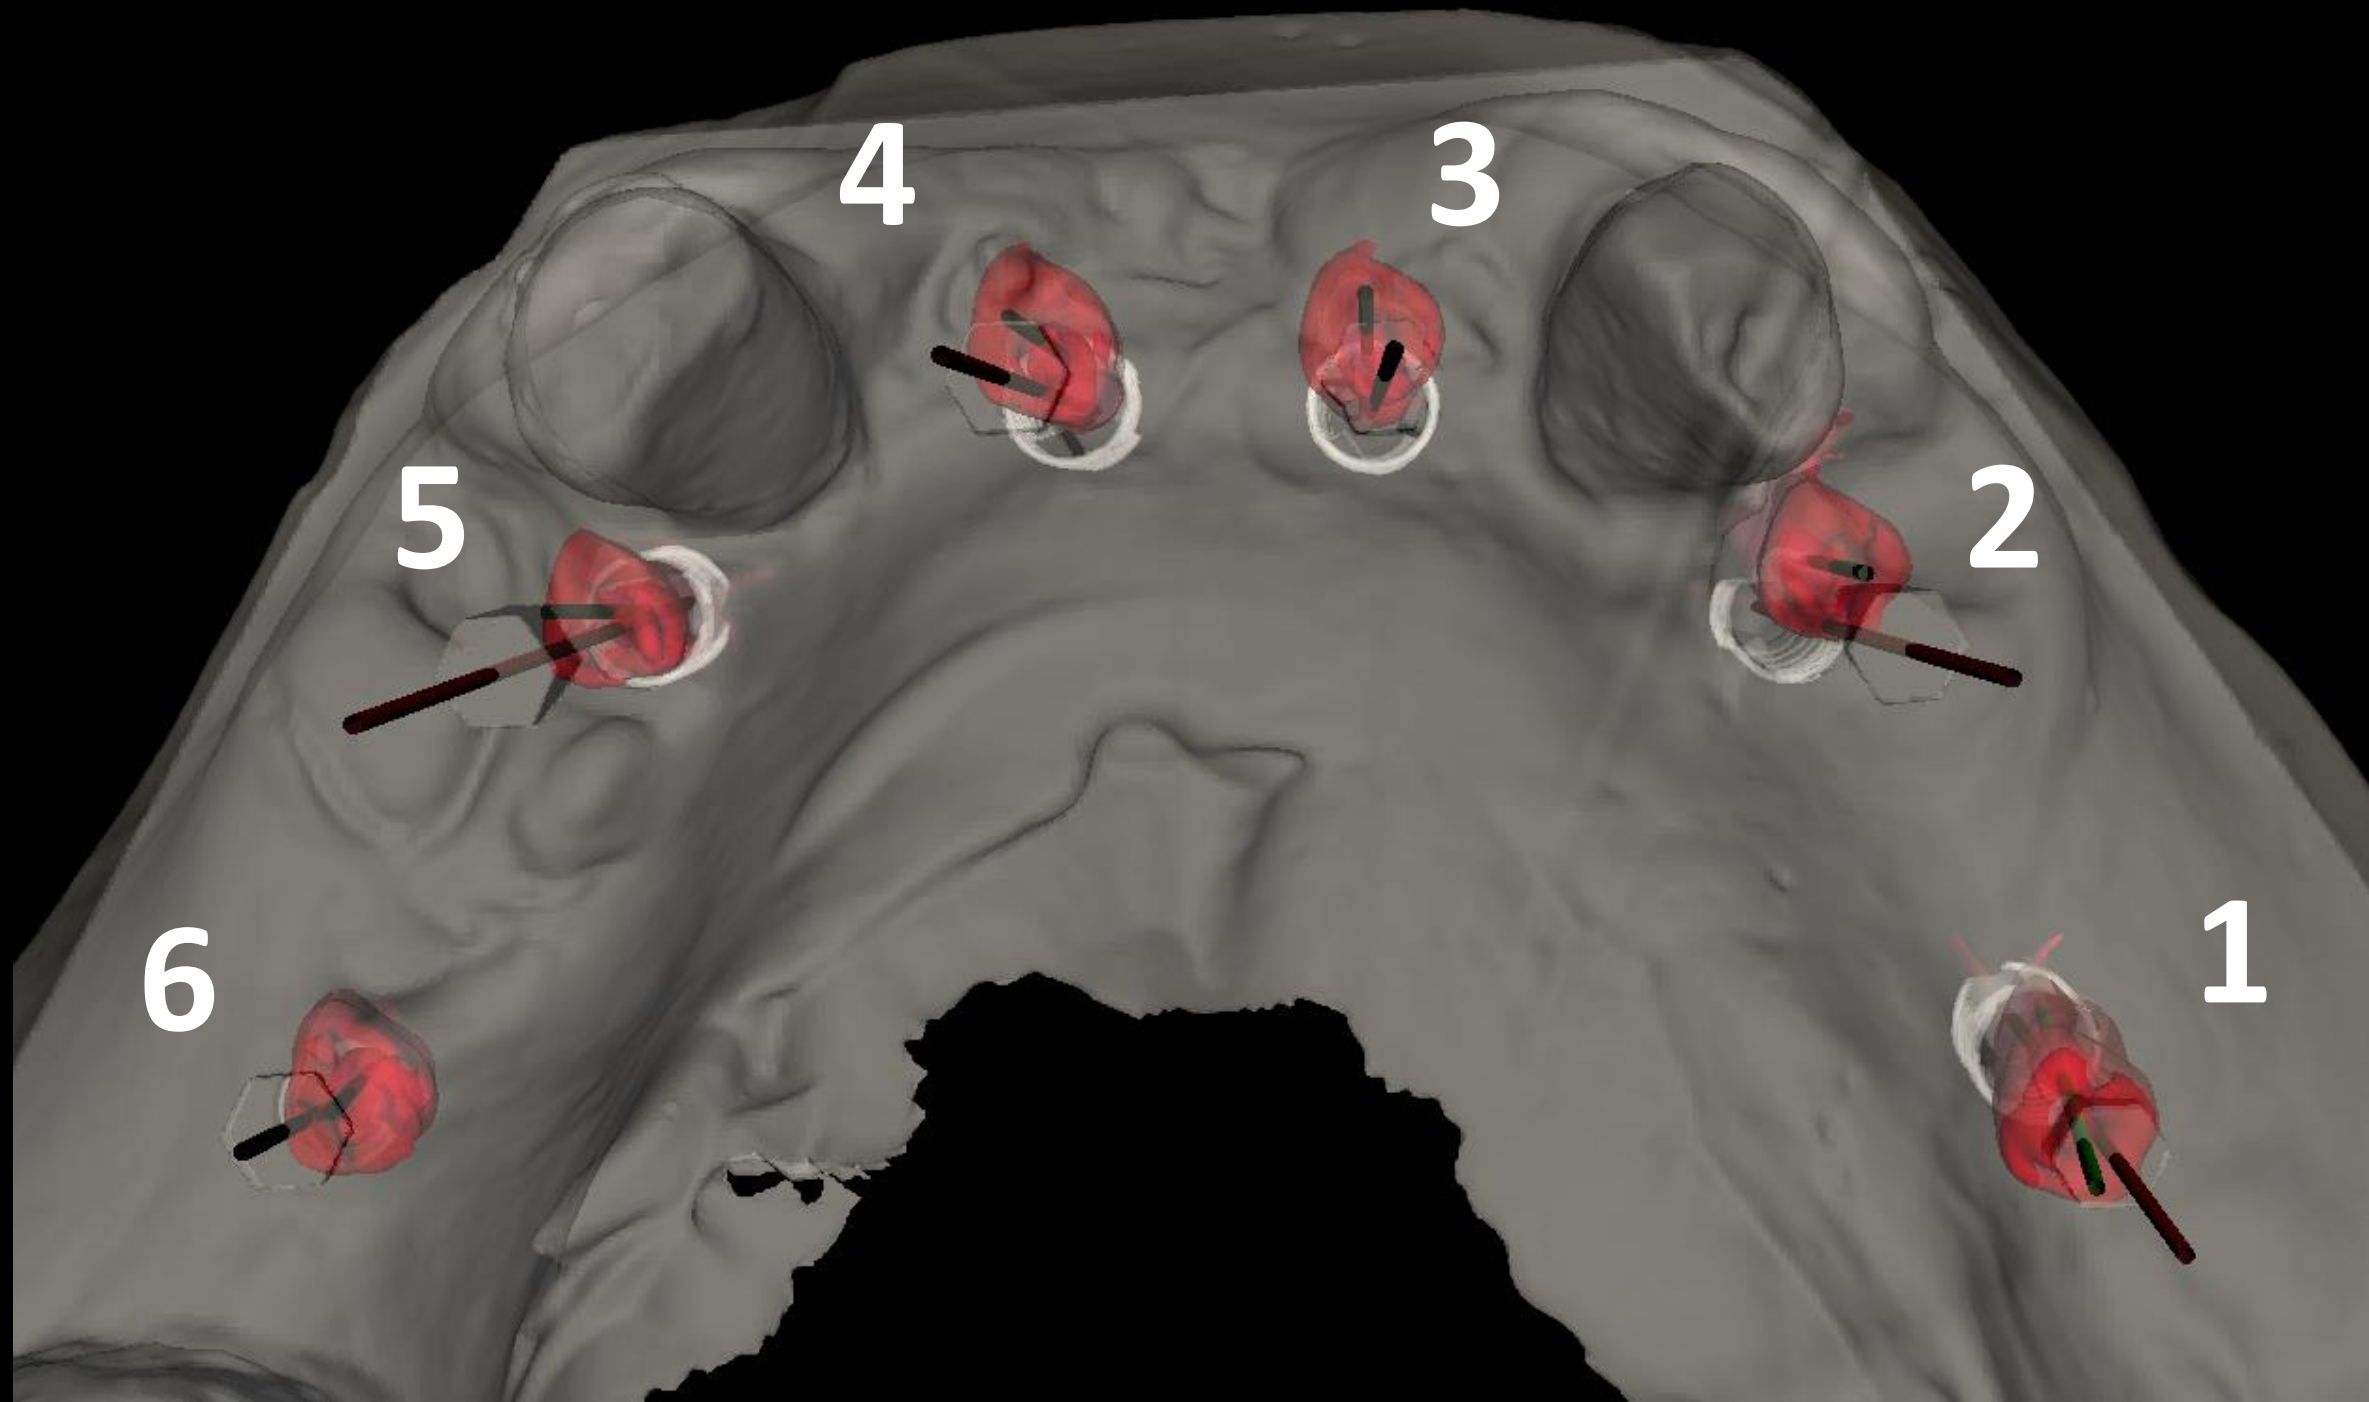

ION0010 - SUP

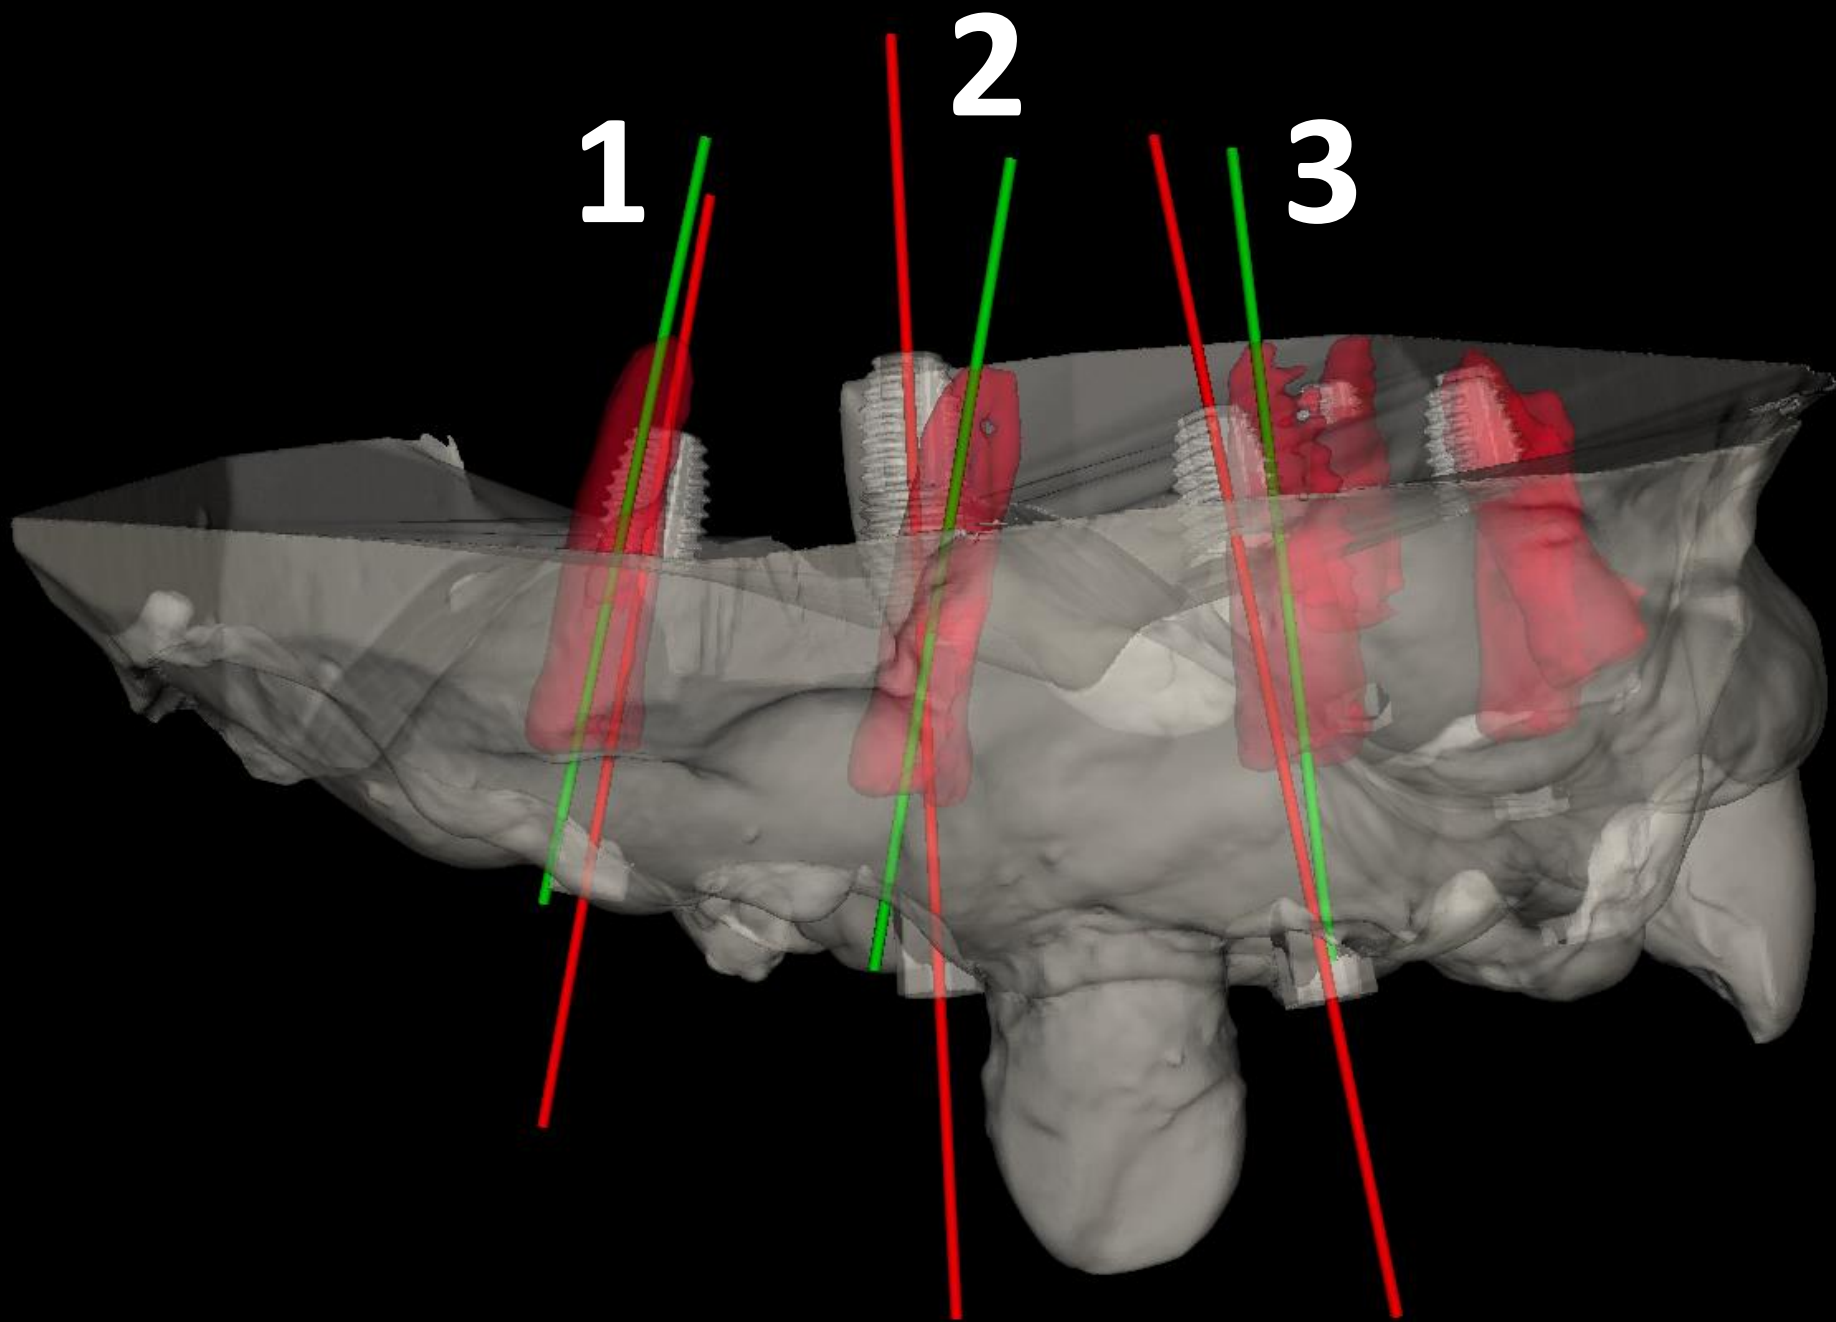

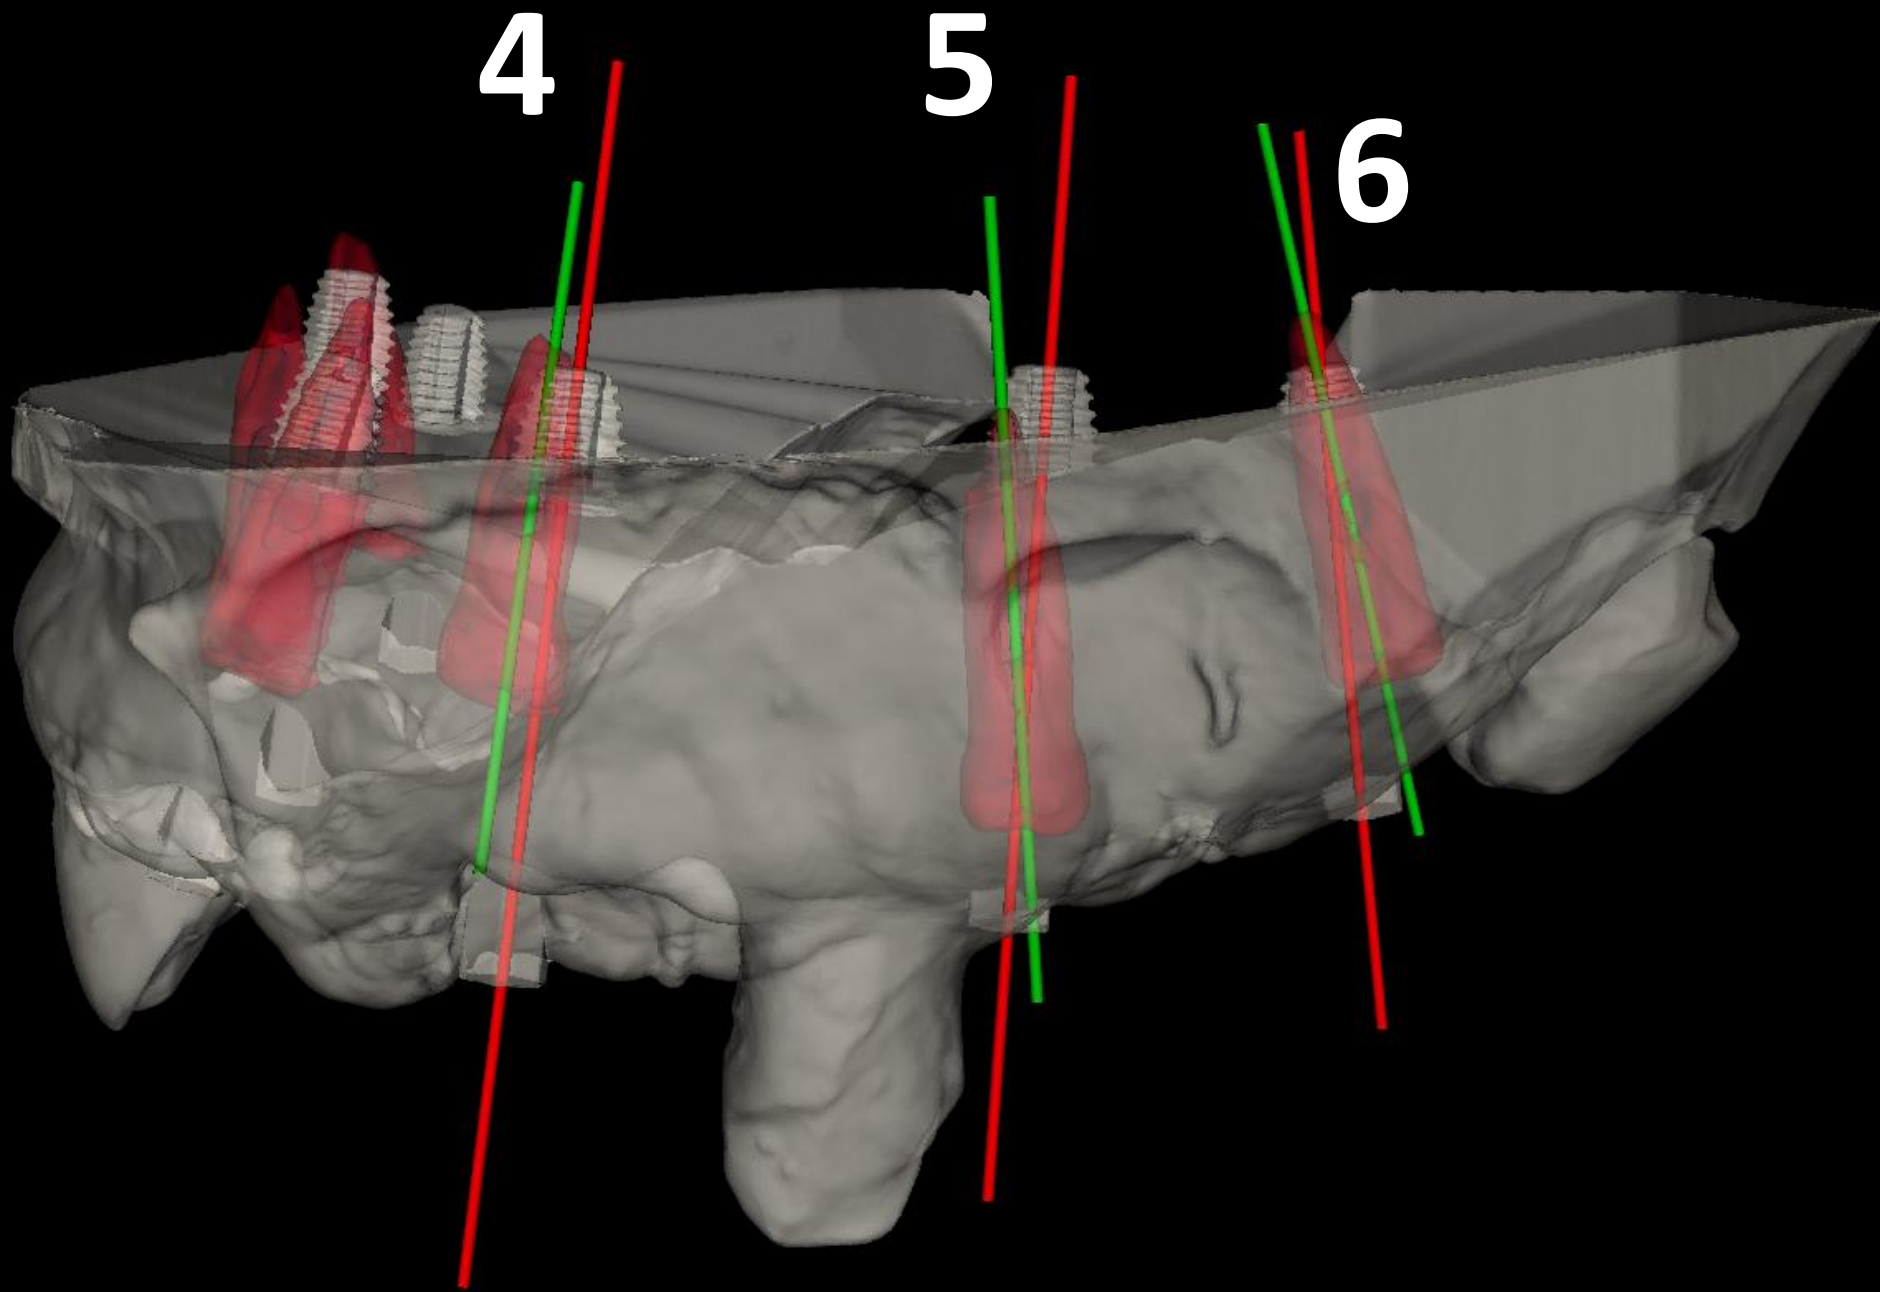

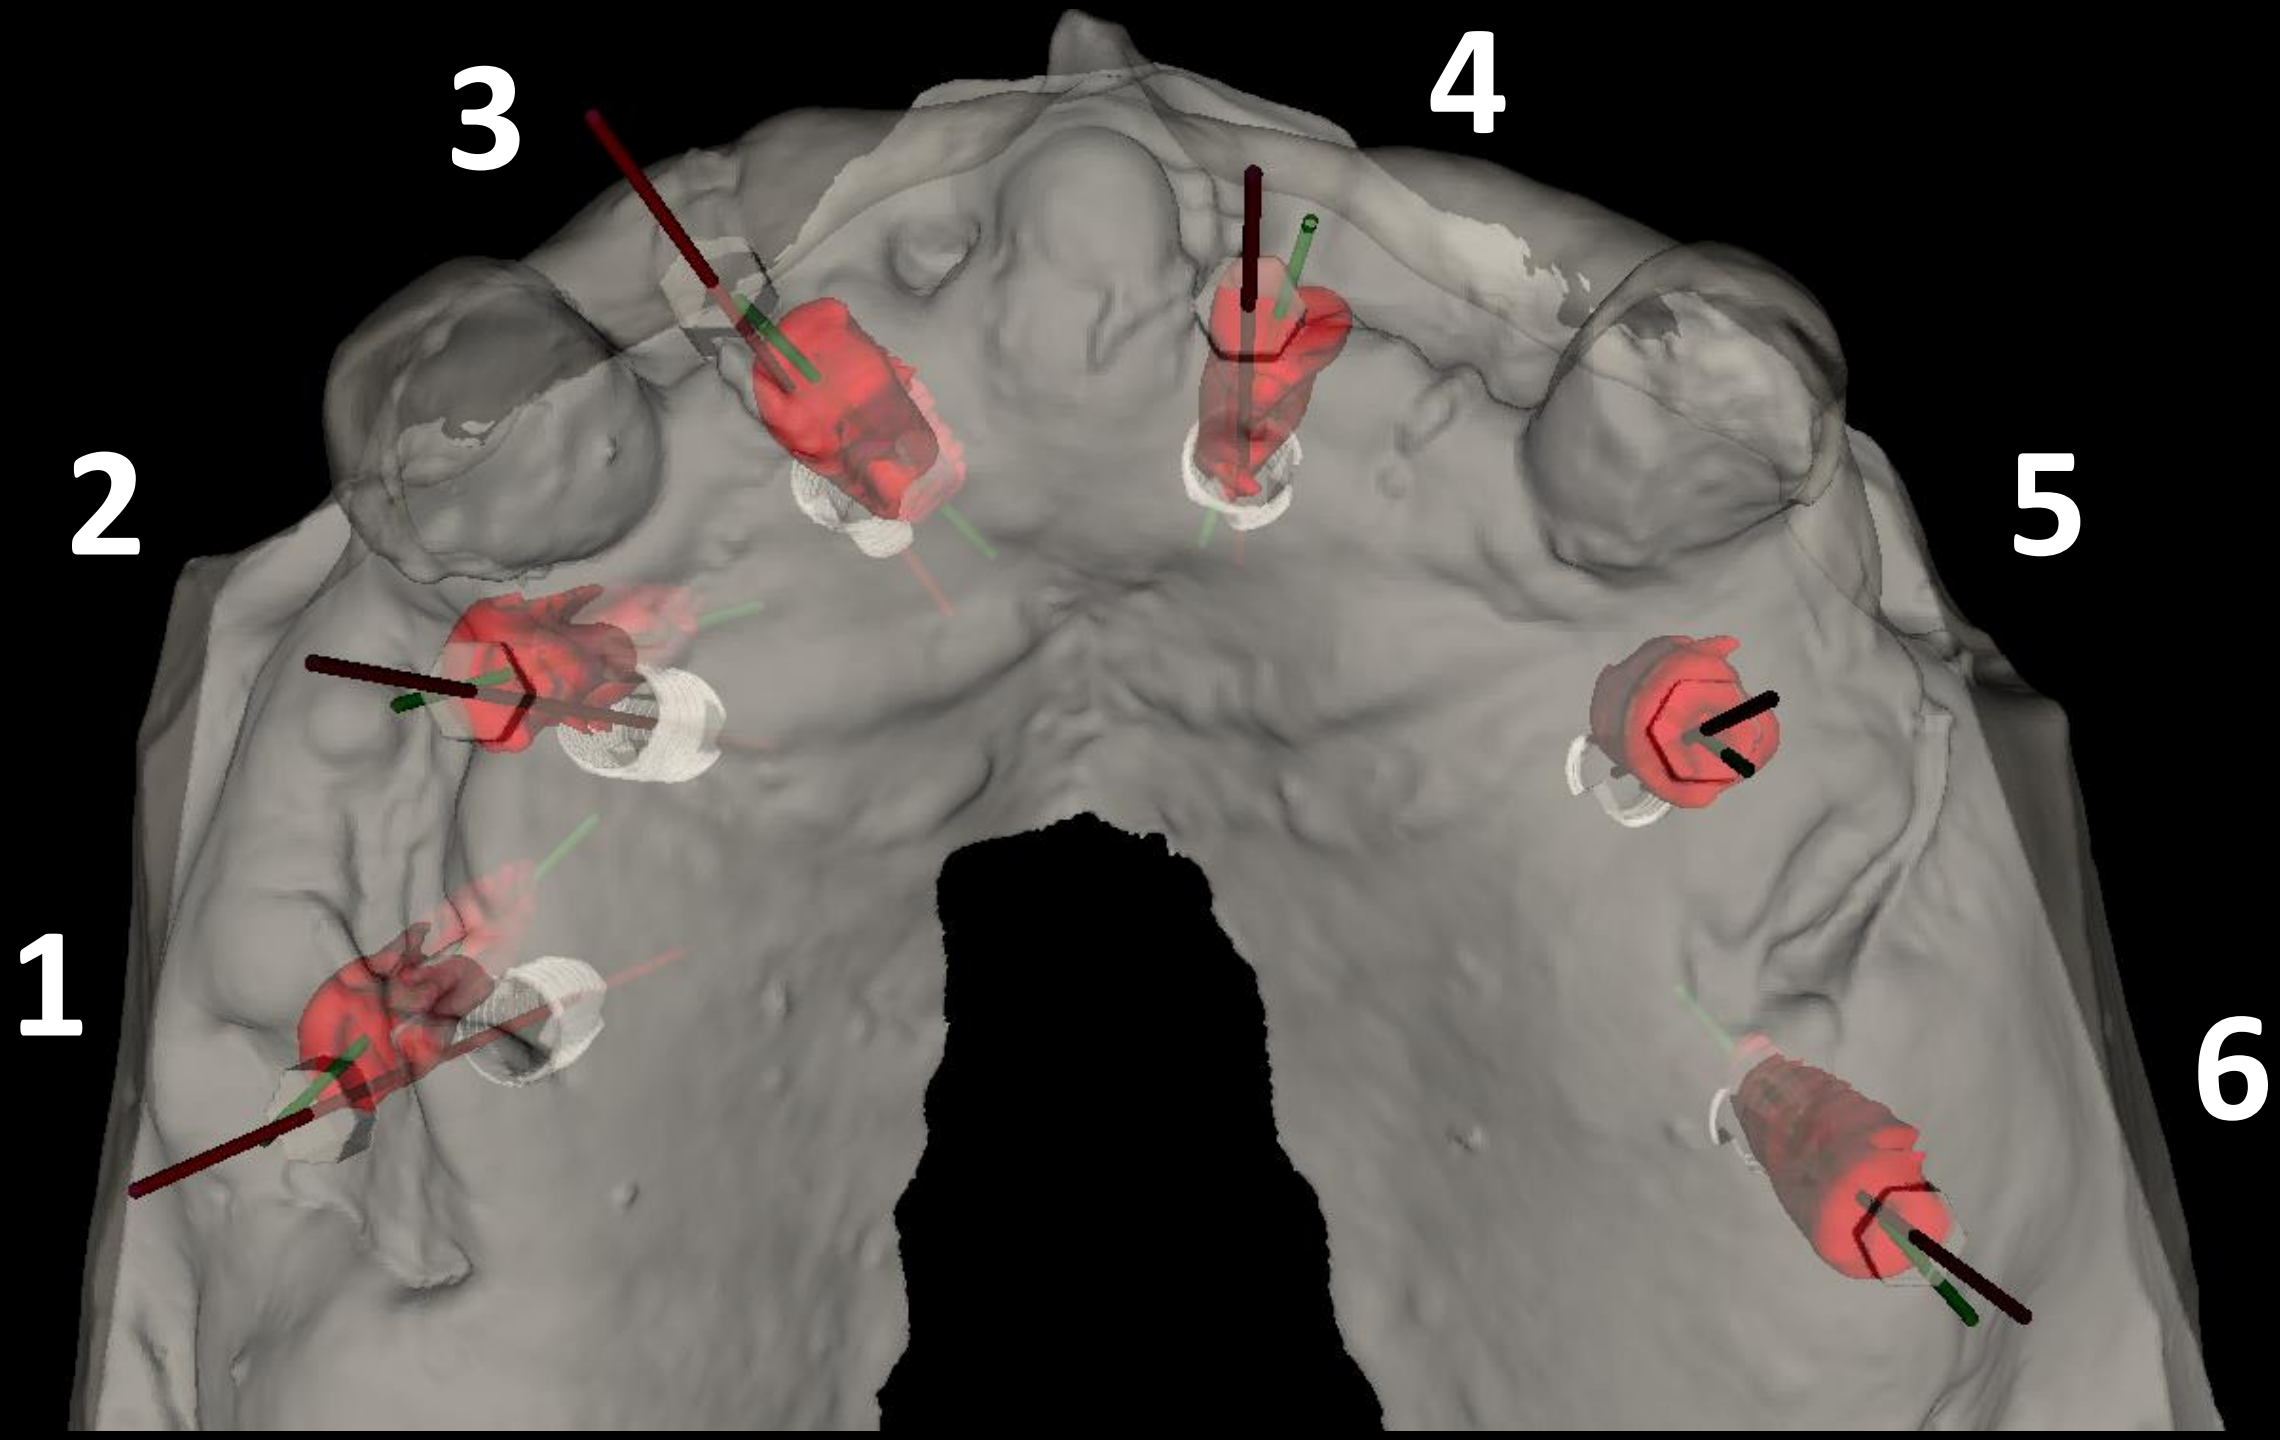

ION0011 - SUP

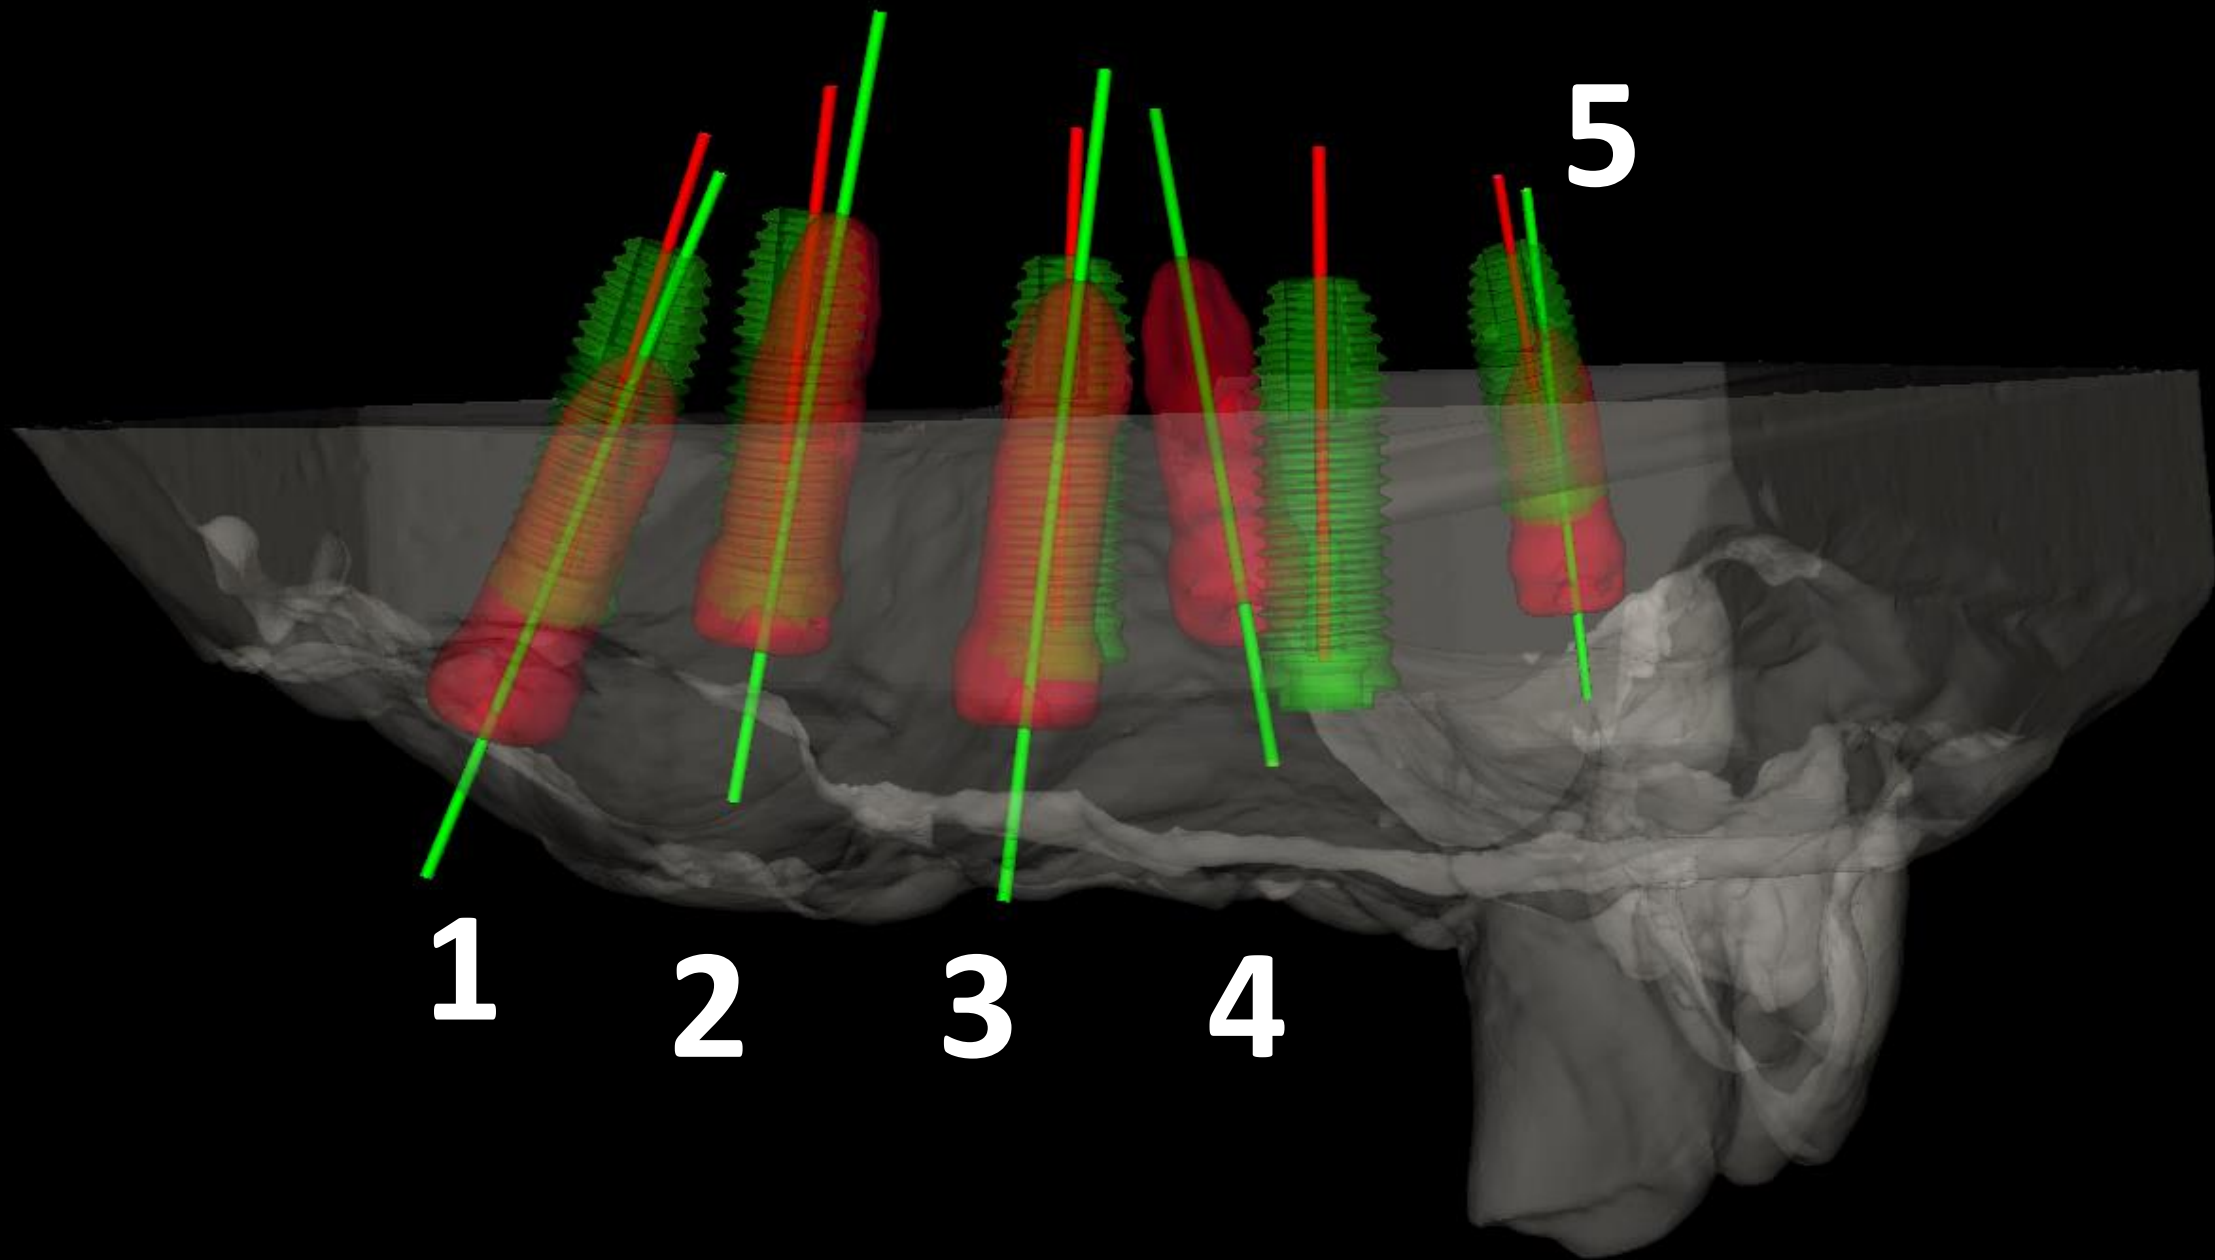



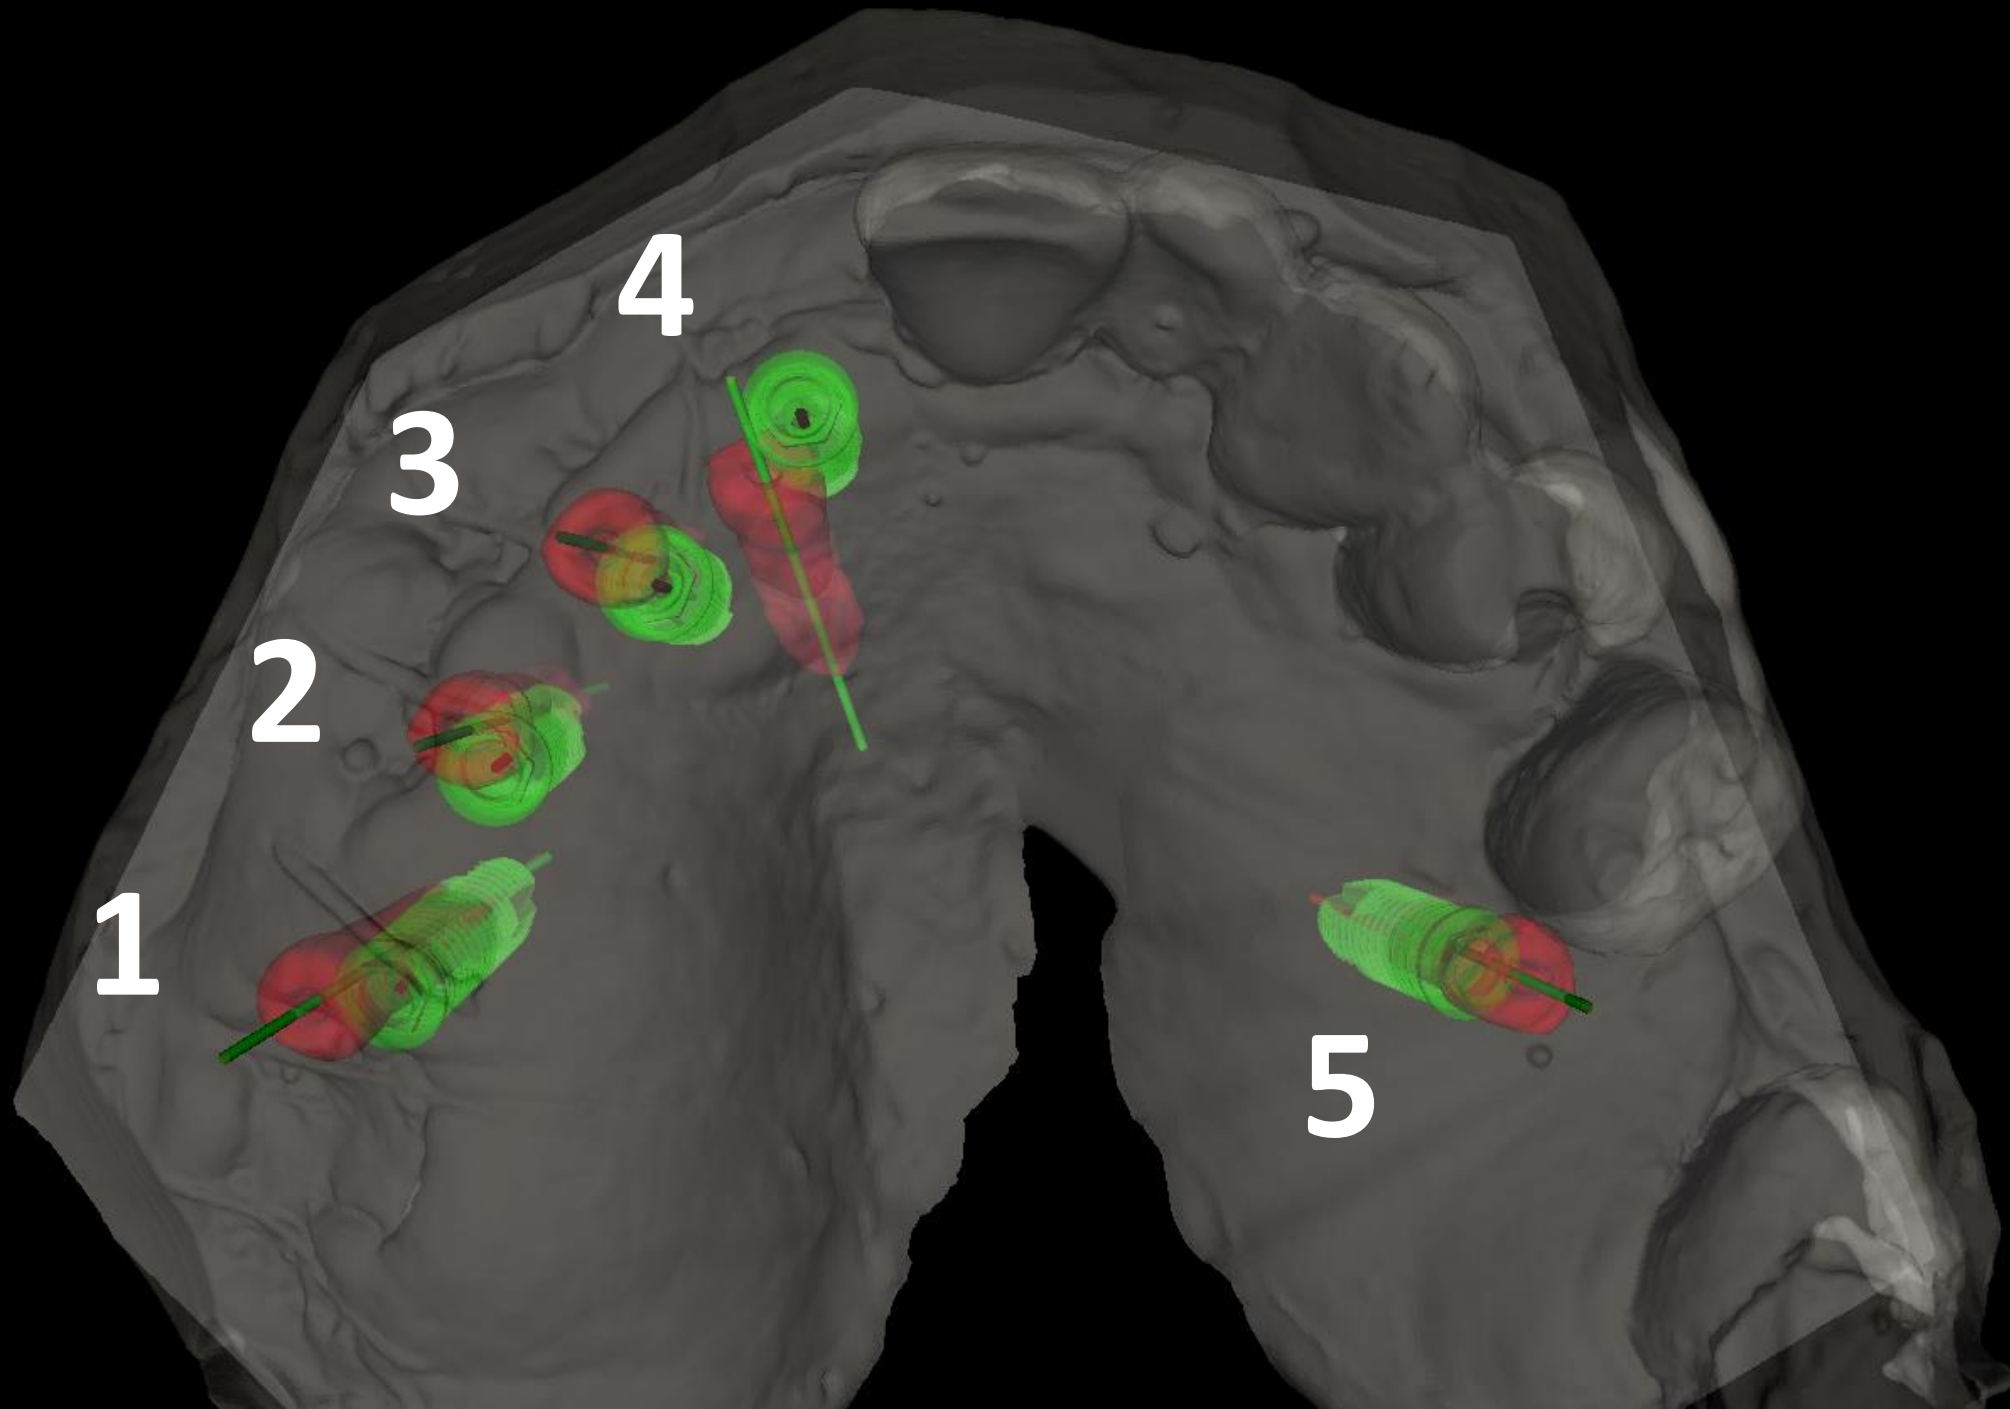

1

2

3

4

5

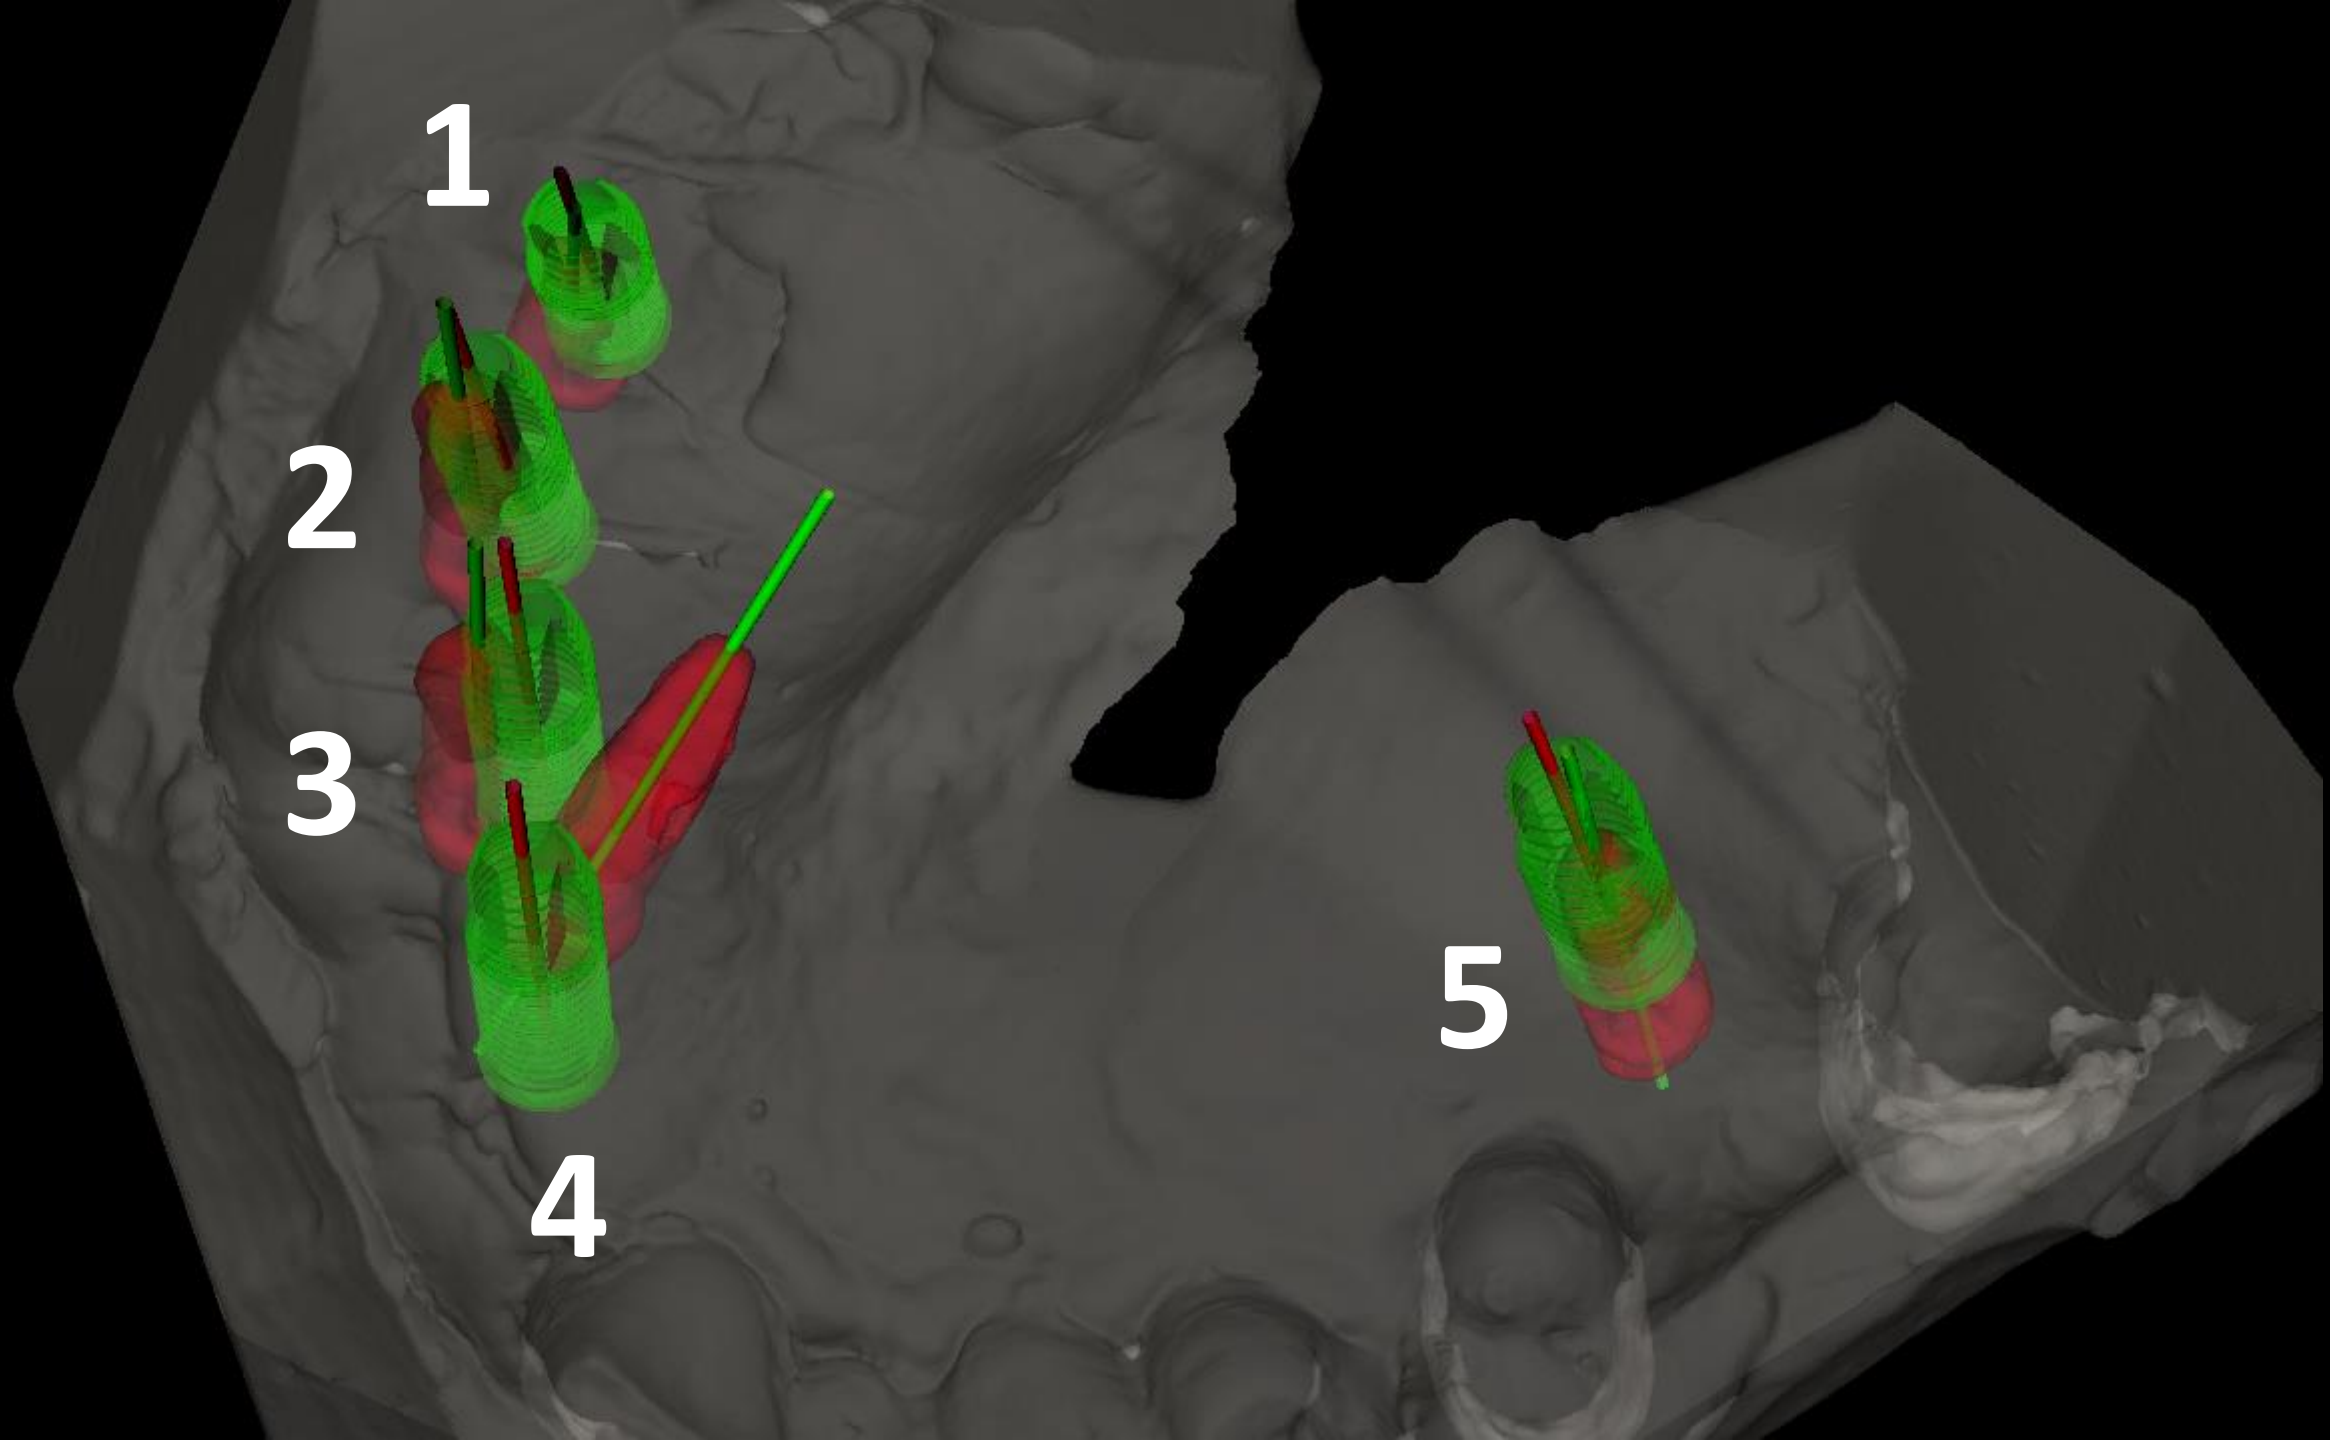

Supplement: DataSheet_1.pdf [file DataSheet_1.pdf]
